# Supplementary material
Source: PubMed Central journal article supplement (PMC6234376)
Supplement: ba020123-suppl1.pdf [file ba020123-suppl1.pdf]

## **CD16<sup>+</sup> monocytes give rise to CD103+RALDH2+TCF4+ dendritic cells with unique transcriptional and immunological features**

Vanessa Sue Wacleche<sup>1,2</sup>, Amélie Cattin<sup>1,2</sup>, Jean-Philippe Goulet<sup>3</sup>, Dominique Gauchat<sup>2</sup>, Annie Gosselin<sup>2</sup>, Aurélie Cleret-Buhot<sup>2</sup>, Yuwei Zhang<sup>1,2</sup>, Cécile Tremblay<sup>1,2</sup>, Jean-Pierre Routy<sup>4,5</sup>, and Petronela Ancuta<sup>1, 2,\*</sup>

<sup>1</sup>Université de Montréal, Faculté de Médecine, Département of microbiologie, infectiologie et immunologie, Montreal, QC, Canada.

<sup>2</sup>Centre de recherche du CHUM, Montreal, QC, Canada.

<sup>3</sup>Caprion Biosciences Inc., Montreal, QC, Canada.

<sup>4</sup>Chronic Viral Illness Service and Research Institute, McGill University Health Centre, Montreal, QC, Canada.

<sup>5</sup>Division of Hematology, McGill University Health Centre, Montreal, QC, Canada.

**\*, Corresponding author**

**E-mail:** [petronela.ancuta@umontreal.ca](mailto:petronela.ancuta@umontreal.ca)

**Running title:** CD16<sup>+</sup> monocyte-derived dendritic cell transcriptome

## **Supplemental Figure Legends**

**Supplemental Figure 1: Purity of FACS isolated monocyte subsets.** Total monocytes were isolated by negative selection using magnetic beads (Miltenyi). Cells were stained with a cocktail of Abs against lineage markers (CD1c, CD3, CD8, CD19, and CD56) and CD16 Abs. Viable lineage<sup>-</sup> CD16<sup>+</sup> and CD16<sup>-</sup> monocytes were isolated by flow cytometry under low sorting pressure. Shown are the expressions of CD16 on total monocytes before sort **(A)** and the purity of CD16<sup>+</sup> and CD16<sup>-</sup> monocytes after sort **(B)**. Results are from one donor, representative of results obtained with cells from >5 different donors.

**Supplemental Figure 2: Both CD16<sup>+</sup> and CD16<sup>-</sup> monocytes acquire classical immature and mature DC markers.** Peripheral blood CD16<sup>+</sup> and CD16<sup>-</sup> monocytes were differentiated into immature MDDC and then into mature MDDC upon exposure to LPS for 48h. Shown is the expression of CD14, CD1a, CD1c, DC-SIGN, CD83 and CCR7 on **(A)** immature MDDC and **(B)** mature MDDC. **(C)** The morphology of immature CD16<sup>+</sup> and CD16<sup>-</sup> MDDC was visualized (40X magnification) by confocal microscopy upon staining with CD1a (DC marker), phalloidin (actin dye), and DAPI (nuclear dye). Results in **A-C** are from one donor representative of results generated with cells from two different donors.

**Supplemental Figure 3: Transcriptional differences between CD16<sup>+</sup> versus CD16<sup>-</sup> MDDC.** CD16<sup>+</sup> and CD16<sup>-</sup> MDDC were exposed to media, LPS or HIV for 24h. RNA was extracted and a genome-wide transcriptional analysis was performed using the Affymetrix technology as described in Figure 1A. Shown are the number of genes differentially expressed in CD16<sup>+</sup> versus CD16<sup>-</sup> MDDC upon exposure to media, LPS or HIV identified based on p-values and Benjamini Hochberg

(BH) p-values (or false discovery rate, FDR, adjusted p-values). Results were generated with matched CD16<sup>+</sup> and CD16<sup>-</sup> MDDC from five different subjects.

**Supplemental Figure 4: Differential gene expression in immature CD16<sup>+</sup> and CD16<sup>-</sup> MDDC.**

Transcriptional profiling was performed as described in Figure 1A. Gene Set Variation Analysis (GSVA) was used to identify top canonical pathways (C2) **(A)** and biological processes (C5) **(B)** differentially expressed in immature CD16<sup>+</sup> *versus* CD16<sup>-</sup> MDDC. Results were generated with cells from five different donors indicated with different color codes.

**Supplemental Figure 5: Differential gene expression in CD16<sup>+</sup> and CD16<sup>-</sup> MDDC in response to LPS.**

Transcriptional profiling was performed as described in Figure 1A with matched MDDC subsets exposed to media (immature) or LPS (mature) for 24h. **(A-B)** Shown are top transcripts upregulated by LPS in CD16<sup>+</sup> and CD16<sup>-</sup> MDDC (p-values <0.05 and FC cut-off of 1.3). Heatmap cells are scaled by the expression level z-scores for each probe individually. Results were generated with cells from five different donors identified with different color codes.

**Supplemental Figure 6: Differential gene expression in CD16<sup>+</sup> and CD16<sup>-</sup> MDDC in response to HIV.**

Transcriptional profiling was performed as described in Figure 1A with matched MDDC subsets exposed to media (immature) or HIV for 24h. **(A-B)** Shown are top transcripts upregulated by HIV in CD16<sup>+</sup> and CD16<sup>-</sup> MDDC, identified based on a fold change cut-off of 1.3 and adjusted p-values (adj. p) <0.05. Heatmap cells are scaled by the expression level z-scores for each probe individually. Results were generated with cells from five different donors identified with different color codes.

**Supplemental Figure 7: Novel functional markers for CD16<sup>+</sup> MDDC.** Genome-wide transcriptional profiles were generated using the Affymetrix HG Plus 2.0 Microarrays, as described in Figure 1A and 1D-H. Shown are the relative expression levels of the following DEGs: ITGAE/CD103, CDH1/E-cadherin; ALDH1A2/RALDH2, TCF7L2/TCF4, TNF- $\alpha$ , CCL22, and CCL18. Results were generated with matched CD16<sup>+</sup> and CD16<sup>-</sup> MDDC subsets from n=5 different individuals exposed to media, LPS or HIV for 24 hours.

**A. Phenotype before FACS sort**

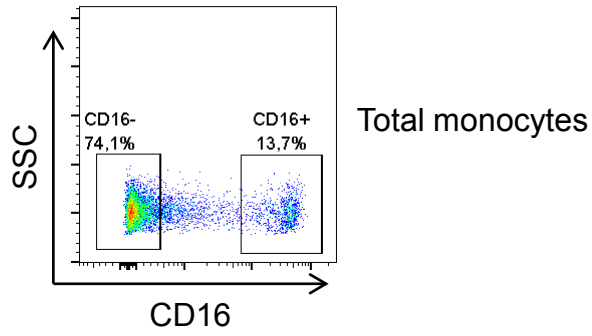

**B. Quality control after FACS sort**

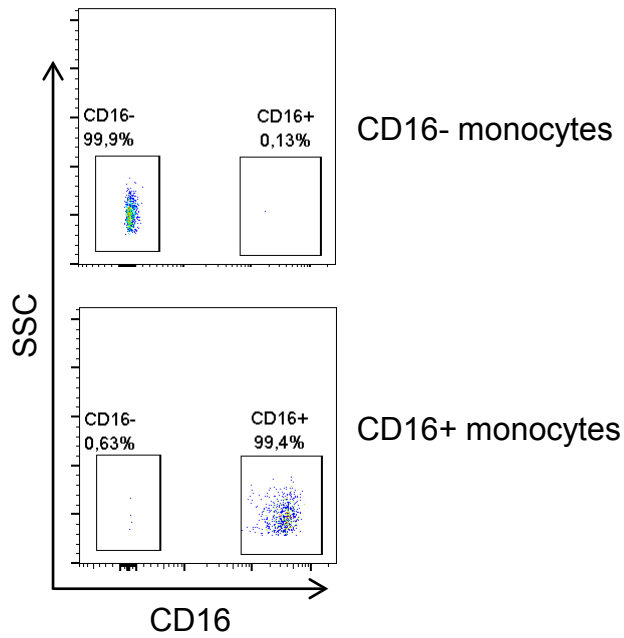

**A. Immature MDDC**

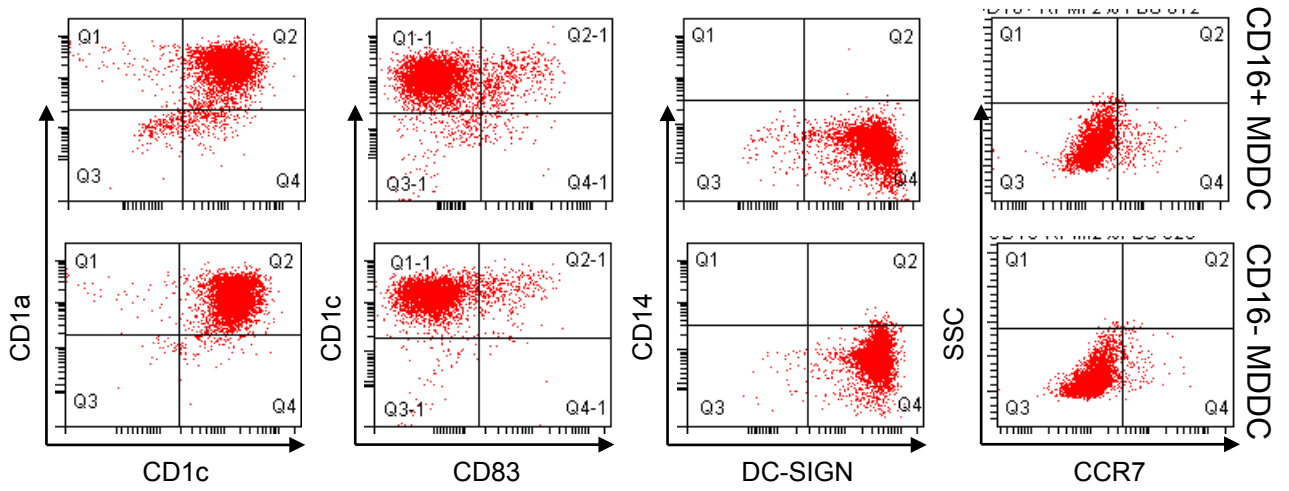

**B. Mature MDDC**

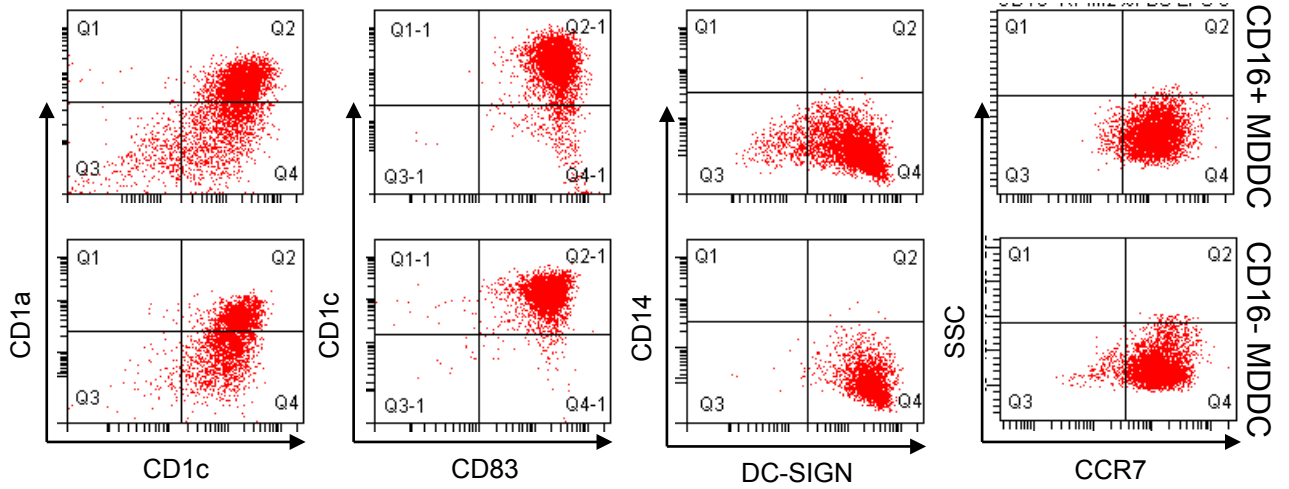

**C. Immature MDDC (40X magnification)**

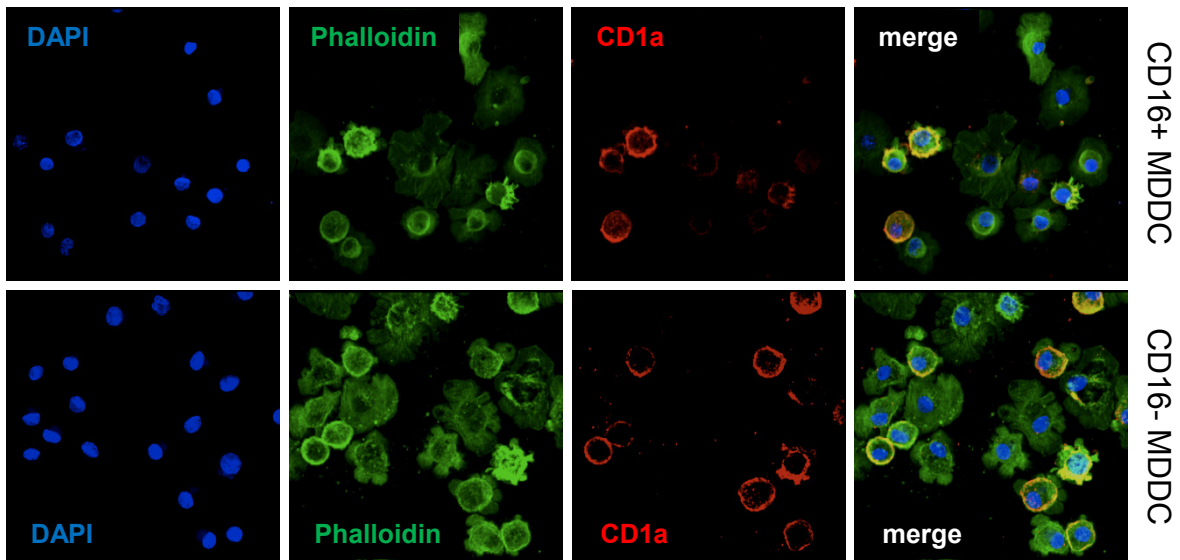

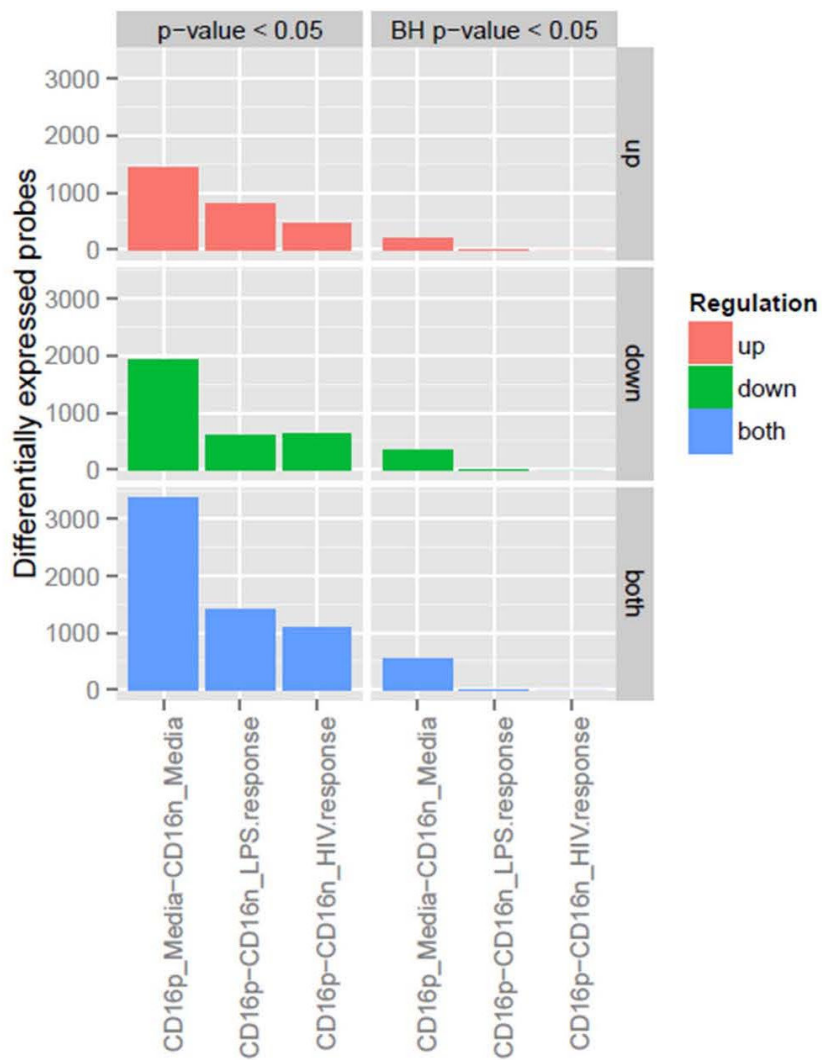

### A. GSVA: C2 Canonical pathways (CD16+ vs. CD16- MDDC)

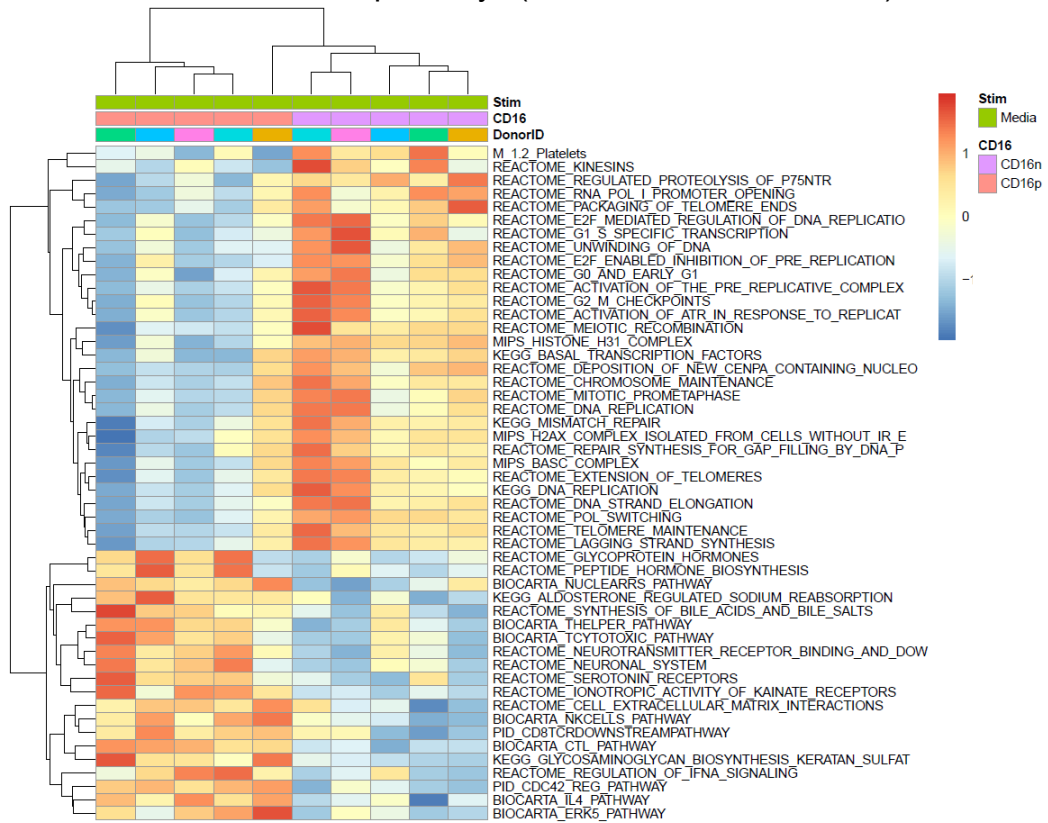

### B. GSVA: C5 Biological processes (CD16+ vs. CD16- MDDC)

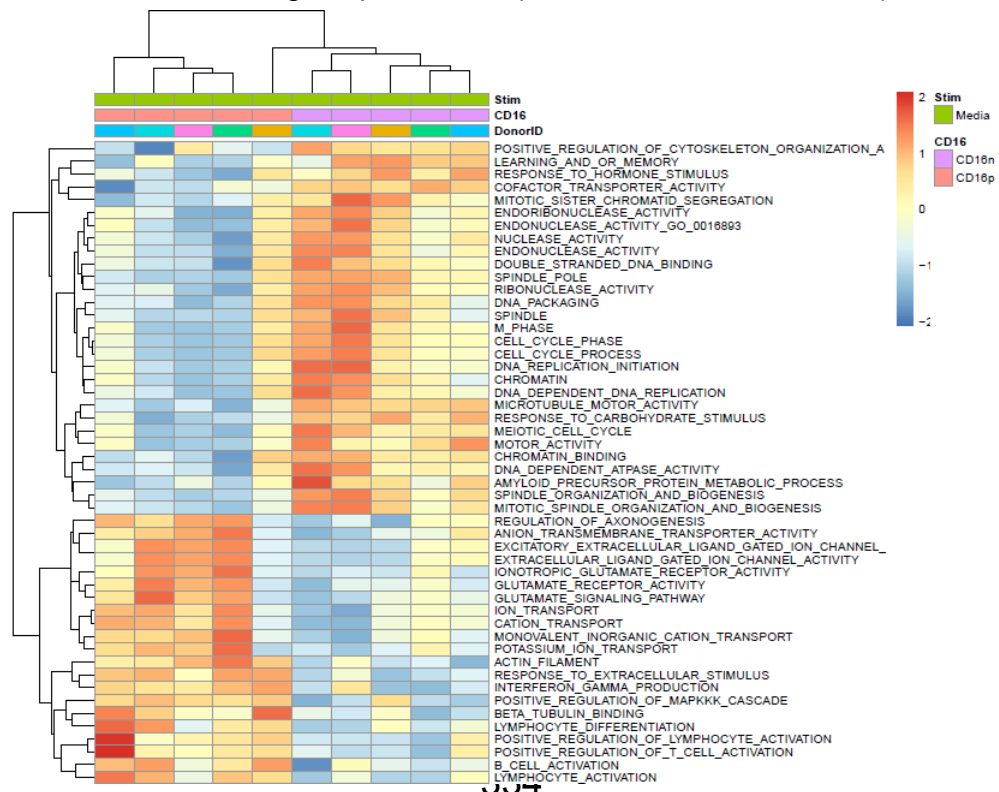



### A. LPS: top modulated transcripts in CD16+ MDDC

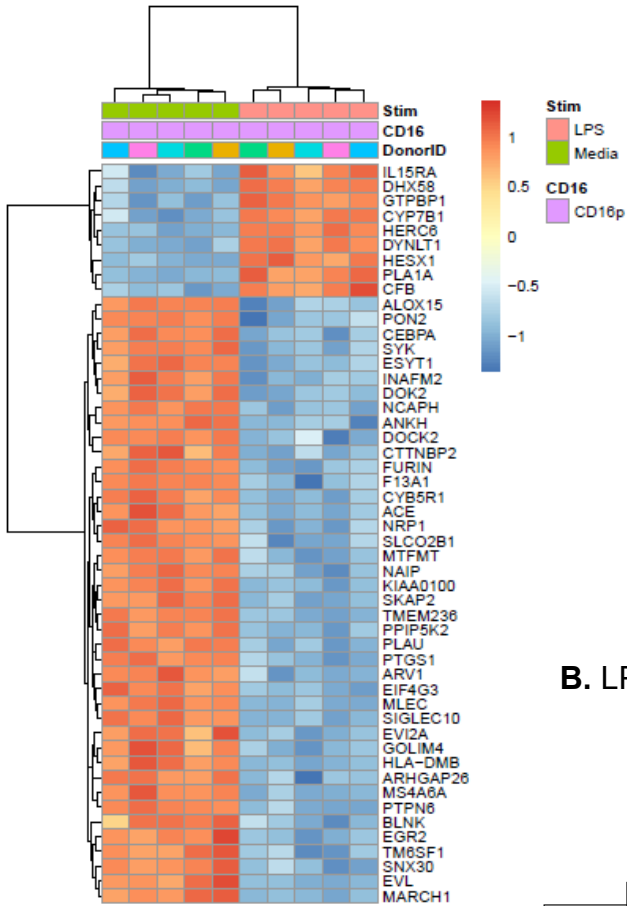

### B. LPS: top modulated transcripts in CD16- MDDC

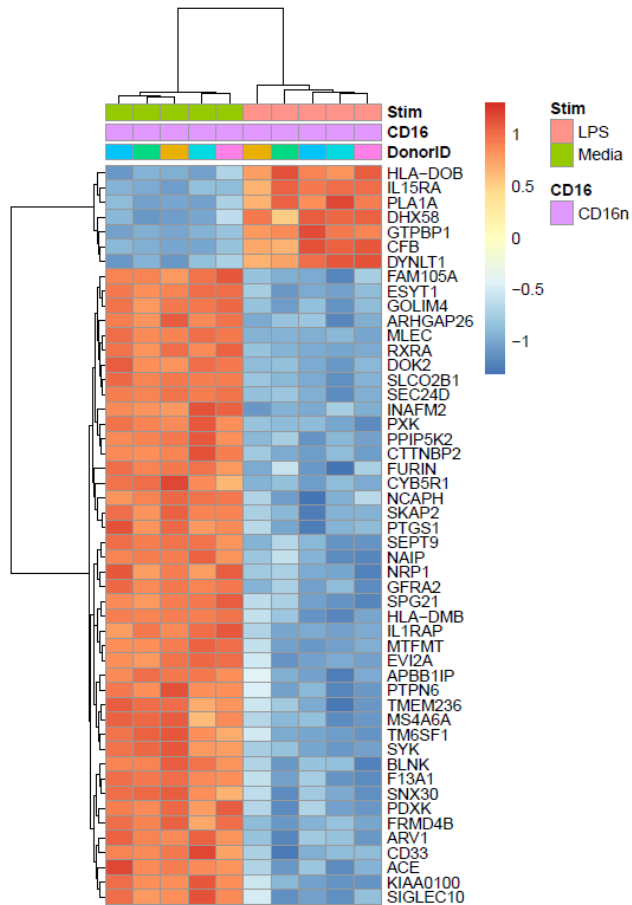

**A. HIV: top modulated transcripts in CD16+ MDDC**

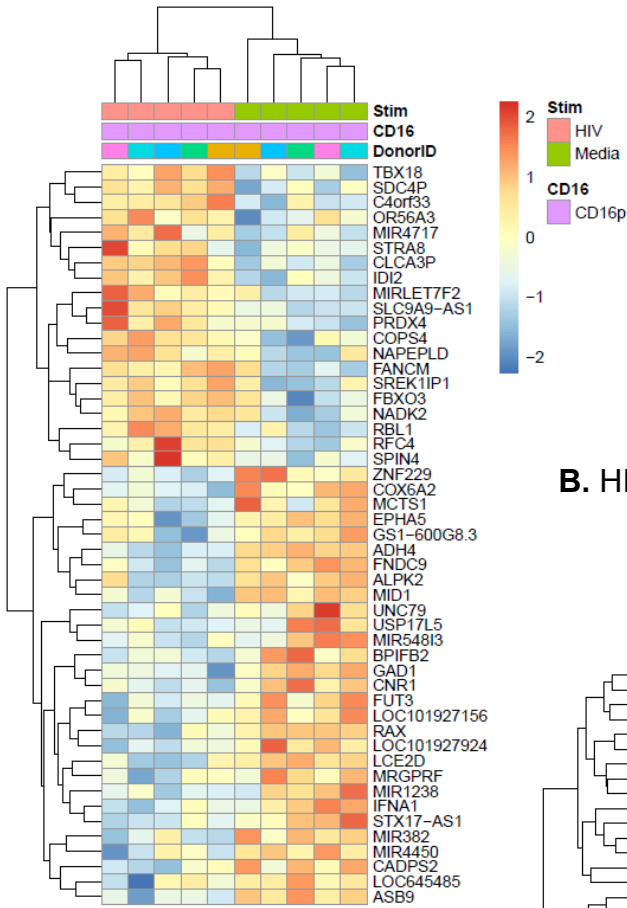

**B. HIV: top modulated transcripts in CD16- MDDC**

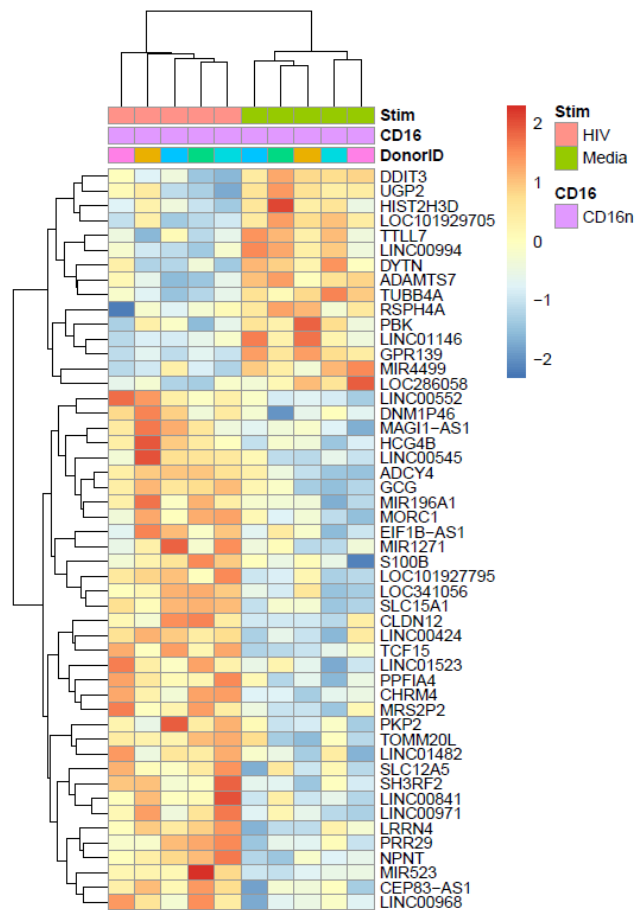

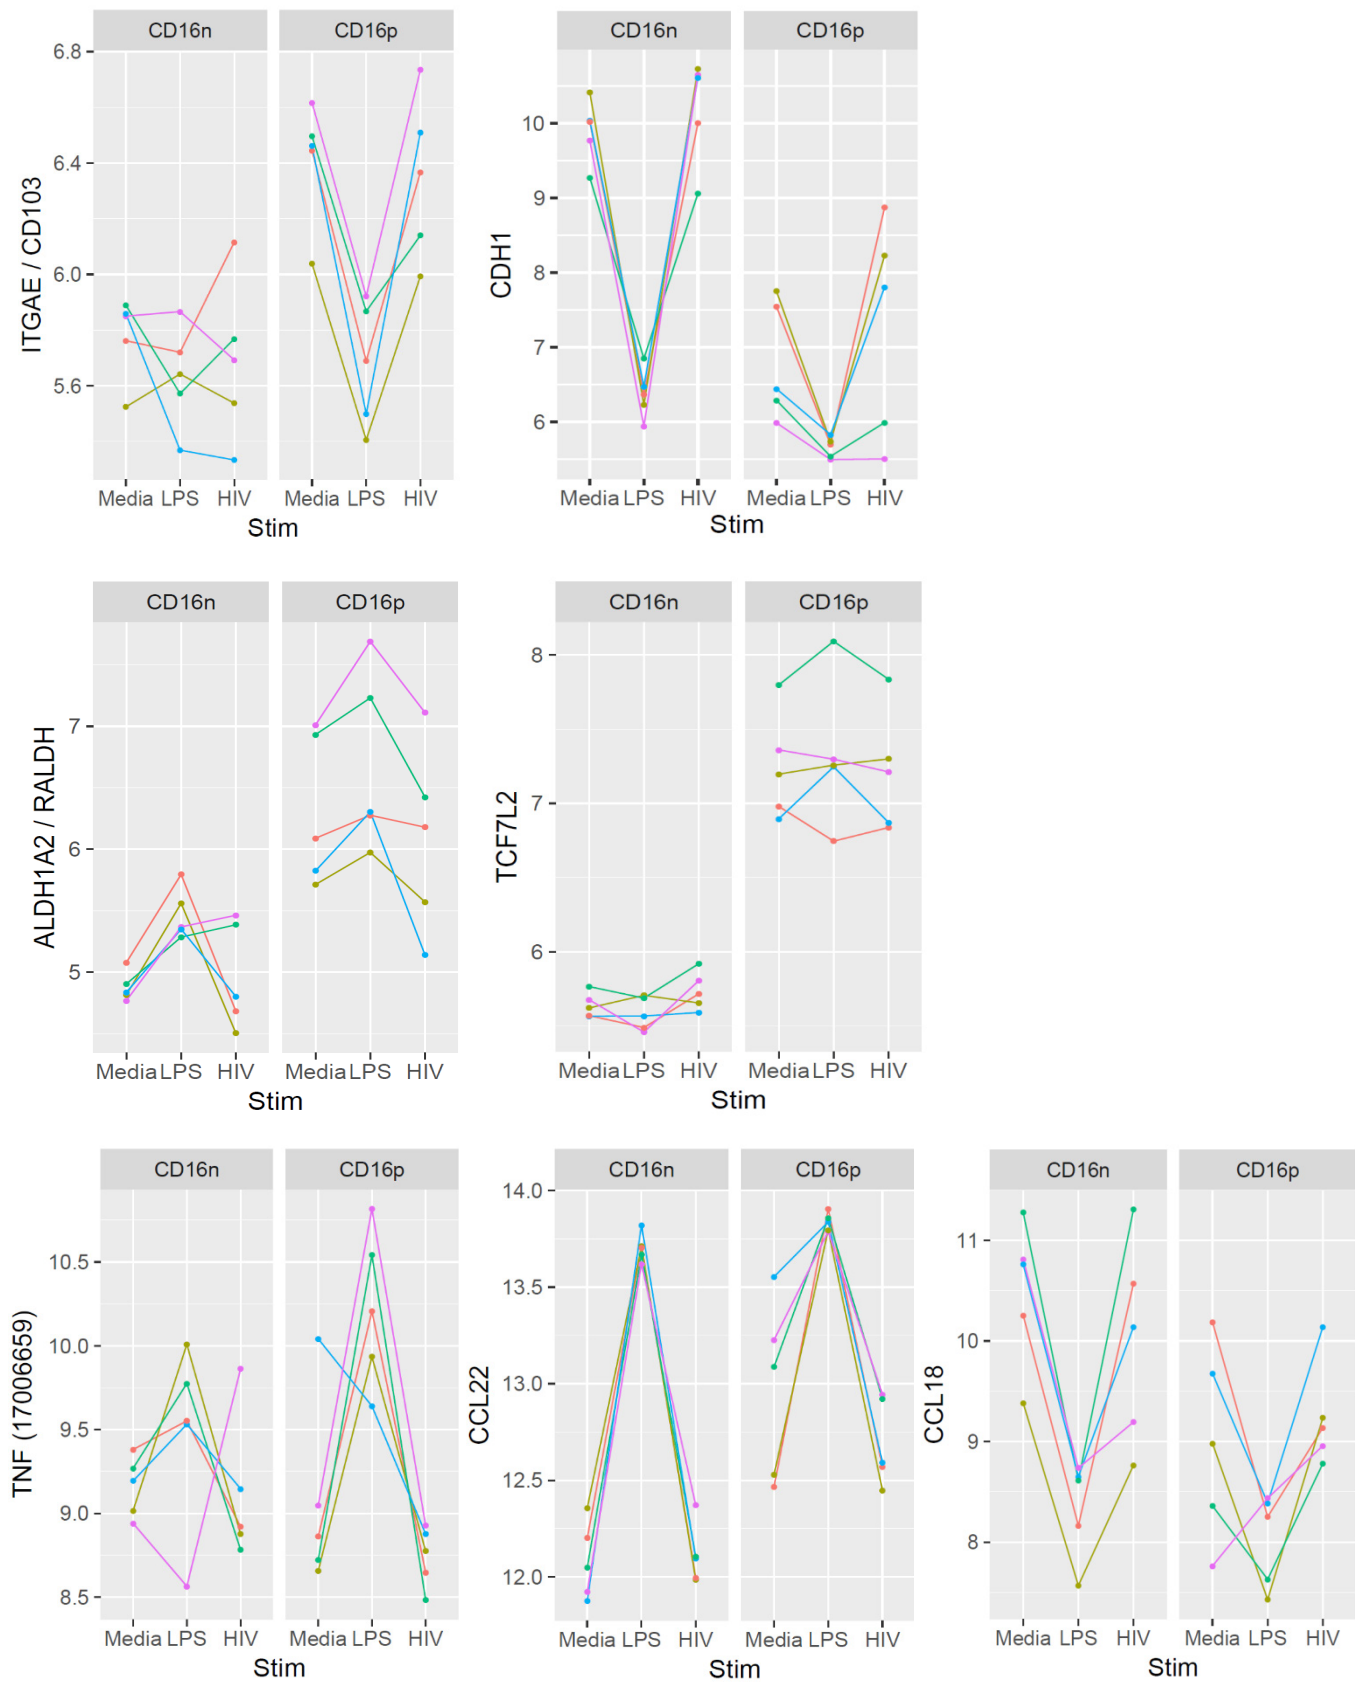

**Suppl. Table 1: Up regulated genes in CD16+ versus CD16-MDDC**

| Symbol  | adj. p      | FC   | description                                                                                           |
|---------|-------------|------|-------------------------------------------------------------------------------------------------------|
| AQP9    | 0,001345084 | 4,63 | aquaporin 9                                                                                           |
| DCSTAMP | 0,020286374 | 3,93 | dendrocyte expressed seven transmembrane protein                                                      |
| TGM2    | 0,028211439 | 3,09 | transglutaminase 2                                                                                    |
| CH25H   | 0,034619967 | 3,07 | cholesterol 25-hydroxylase                                                                            |
| TCF7L2  | 3,34E-07    | 3,05 | transcription factor 7-like 2 (T-cell specific, HMG-box)                                              |
| LILRB1  | 0,036864756 | 2,98 | leukocyte immunoglobulin-like receptor, subfamily B (with TM and ITIM domains), member 1              |
| RGCC    | 0,021578042 | 2,83 | regulator of cell cycle                                                                               |
| CHST15  | 0,000199888 | 2,75 | carbohydrate (N-acetylgalactosamine 4-sulfate 6-O) sulfotransferase 15                                |
| ALDH1A2 | 0,004504132 | 2,70 | aldehyde dehydrogenase 1 family, member A2                                                            |
| LRP1    | 0,00404557  | 2,57 | low density lipoprotein receptor-related protein 1                                                    |
| GBP4    | 0,032916924 | 2,55 | guanylate binding protein 4                                                                           |
| GIMAP4  | 0,020906716 | 2,53 | GTPase, IMAP family member 4                                                                          |
| LPL     | 0,003332613 | 2,51 | lipoprotein lipase                                                                                    |
| CCND2   | 0,021343315 | 2,50 | cyclin D2                                                                                             |
| SLAMF7  | 0,032922542 | 2,46 | SLAM family member 7                                                                                  |
| EPS8    | 9,94E-06    | 2,38 | epidermal growth factor receptor pathway substrate 8                                                  |
| INHBA   | 0,005886239 | 2,34 | inhibin, beta A                                                                                       |
| IL21R   | 0,003557576 | 2,32 | interleukin 21 receptor                                                                               |
| SCIMP   | 0,041179995 | 2,30 | SLP adaptor and CSK interacting membrane protein                                                      |
| GPC4    | 0,009520189 | 2,27 | glypican 4                                                                                            |
| TIMP3   | 0,014365449 | 2,24 | TIMP metalloproteinase inhibitor 3                                                                    |
| SASH1   | 0,006627678 | 2,24 | SAM and SH3 domain containing 1                                                                       |
| FAM20A  | 0,005999118 | 2,24 | family with sequence similarity 20, member A                                                          |
| PIK3AP1 | 0,022387659 | 2,22 | phosphoinositide-3-kinase adaptor protein 1                                                           |
| ITGAL   | 0,003432854 | 2,20 | integrin, alpha L (antigen CD11A (p180), lymphocyte function-associated antigen 1; alpha polypeptide) |
| ABHD2   | 0,000179965 | 2,16 | abhydrolase domain containing 2                                                                       |
| SETBP1  | 0,006424162 | 2,15 | SET binding protein 1                                                                                 |

|              |             |      |                                                                                                |
|--------------|-------------|------|------------------------------------------------------------------------------------------------|
| C1orf162     | 0,028319964 | 2,15 | chromosome 1 open reading frame 162                                                            |
| DOCK3        | 0,000226732 | 2,09 | dedicator of cytokinesis 3                                                                     |
| LOC100507639 | 0,012768831 | 2,06 | uncharacterized LOC100507639                                                                   |
| SYT17        | 0,000981734 | 2,05 | synaptotagmin XVII                                                                             |
| SEL1L3       | 0,042374321 | 2,04 | sel-1 suppressor of lin-12-like 3 (C. elegans)                                                 |
| PPARG        | 0,016111031 | 2,03 | peroxisome proliferator-activated receptor gamma                                               |
| FGD5         | 0,042374321 | 2,02 | FYVE, RhoGEF and PH domain containing 5                                                        |
| MSR1         | 0,007283765 | 2,00 | macrophage scavenger receptor 1                                                                |
| GALNT12      | 0,020574533 | 1,99 | polypeptide N-acetylgalactosaminyltransferase 12                                               |
| MLLT4        | 0,001235784 | 1,99 | myeloid/lymphoid or mixed-lineage leukemia (trithorax homolog, Drosophila); translocated to, 4 |
| LY9          | 0,000844131 | 1,98 | lymphocyte antigen 9                                                                           |
| IL15         | 0,040047509 | 1,98 | interleukin 15                                                                                 |
| GCH1         | 0,004766439 | 1,97 | GTP cyclohydrolase 1                                                                           |
| TREM2        | 0,020299151 | 1,97 | triggering receptor expressed on myeloid cells 2                                               |
| OCSTAMP      | 0,014217266 | 1,94 | osteoclast stimulatory transmembrane protein                                                   |
| SPRY2        | 0,019516901 | 1,91 | sprouty homolog 2 (Drosophila)                                                                 |
| CLEC19A      | 0,049290329 | 1,88 | C-type lectin domain family 19, member A                                                       |
| LOC200772    | 4,46E-06    | 1,88 | uncharacterized LOC200772                                                                      |
| HEG1         | 0,022396076 | 1,87 | heart development protein with EGF-like domains 1                                              |
| FAR2         | 0,042362266 | 1,87 | fatty acyl CoA reductase 2                                                                     |
| ATF3         | 0,016735127 | 1,86 | activating transcription factor 3                                                              |
| CCL22        | 0,000456819 | 1,86 | chemokine (C-C motif) ligand 22                                                                |
| GBP2         | 0,005119835 | 1,84 | guanylate binding protein 2, interferon-inducible                                              |
| TBC1D9       | 0,001763953 | 1,83 | TBC1 domain family, member 9 (with GRAM domain)                                                |
| BCAT1        | 0,00929276  | 1,81 | branched chain amino-acid transaminase 1, cytosolic                                            |
| DHRS11       | 0,025314821 | 1,81 | dehydrogenase/reductase (SDR family) member 11                                                 |
| DENND5A      | 0,003704764 | 1,80 | DENN/MADD domain containing 5A                                                                 |
| ETV5         | 0,022110824 | 1,80 | ets variant 5                                                                                  |
| ITPKB        | 0,007283765 | 1,78 | inositol-trisphosphate 3-kinase B                                                              |

|          |             |      |                                                                                           |
|----------|-------------|------|-------------------------------------------------------------------------------------------|
| RAPH1    | 0,01446133  | 1,78 | Ras association (RalGDS/AF-6) and pleckstrin homology domains 1                           |
| KCNN4    | 0,018925464 | 1,77 | potassium intermediate/small conductance calcium-activated channel, subfamily N, member 4 |
| PHLDA1   | 0,01544101  | 1,77 | pleckstrin homology-like domain, family A, member 1                                       |
| SLC8A1   | 0,042362266 | 1,76 | solute carrier family 8 (sodium/calcium exchanger), member 1                              |
| ALCAM    | 0,049461456 | 1,75 | activated leukocyte cell adhesion molecule                                                |
| FA2H     | 0,001436212 | 1,75 | fatty acid 2-hydroxylase                                                                  |
| MGLL     | 0,046207314 | 1,74 | monoglyceride lipase                                                                      |
| MREG     | 0,013526454 | 1,73 | melanoregulin                                                                             |
| ROR1-AS1 | 0,041940432 | 1,71 | ROR1 antisense RNA 1                                                                      |
| BHLHE41  | 0,010636839 | 1,71 | basic helix-loop-helix family, member e41                                                 |
| TLE1     | 0,032344918 | 1,71 | transducin-like enhancer of split 1 (E(sp1) homolog, Drosophila)                          |
| PAG1     | 0,010636839 | 1,69 | phosphoprotein membrane anchor with glycosphingolipid microdomains 1                      |
| SERPINA1 | 0,004504132 | 1,69 | serpin peptidase inhibitor, clade A (alpha-1 antiproteinase, antitrypsin), member 1       |
| CABP4    | 3,35E-05    | 1,68 | calcium binding protein 4                                                                 |
| MCOLN3   | 0,006424162 | 1,67 | mucolipin 3                                                                               |
| MEF2C    | 0,020299151 | 1,67 | myocyte enhancer factor 2C                                                                |
| H6PD     | 0,00404557  | 1,65 | hexose-6-phosphate dehydrogenase (glucose 1-dehydrogenase)                                |
| SLC7A7   | 0,02872293  | 1,64 | solute carrier family 7 (amino acid transporter light chain, y+L system), member 7        |
| CD86     | 0,00399585  | 1,62 | CD86 molecule                                                                             |
| NBEAL2   | 0,003432854 | 1,62 | neurobeachin-like 2                                                                       |
| ST3GAL1  | 0,014365449 | 1,60 | ST3 beta-galactoside alpha-2,3-sialyltransferase 1                                        |
| AKT3     | 0,00929276  | 1,58 | v-akt murine thymoma viral oncogene homolog 3                                             |
| SLC15A3  | 0,007899462 | 1,58 | solute carrier family 15 (oligopeptide transporter), member 3                             |
| CHST11   | 0,010952307 | 1,58 | carbohydrate (chondroitin 4) sulfotransferase 11                                          |
| DOCK5    | 0,022477926 | 1,58 | dedicator of cytokinesis 5                                                                |
| UCP2     | 0,001235784 | 1,58 | uncoupling protein 2 (mitochondrial, proton carrier)                                      |
| ACTA2    | 0,003743328 | 1,57 | actin, alpha 2, smooth muscle, aorta                                                      |
| P2RX1    | 0,013526454 | 1,56 | purinergic receptor P2X, ligand-gated ion channel, 1                                      |
| EML4     | 0,028211439 | 1,55 | echinoderm microtubule associated protein like 4                                          |

|              |             |      |                                                                                          |
|--------------|-------------|------|------------------------------------------------------------------------------------------|
| KIAA0513     | 0,034619967 | 1,55 | KIAA0513                                                                                 |
| ITGAE        | 0,005886239 | 1,55 | integrin, alpha E (antigen CD103, human mucosal lymphocyte antigen 1; alpha polypeptide) |
| ARAP2        | 0,002656371 | 1,54 | ArfGAP with RhoGAP domain, ankyrin repeat and PH domain 2                                |
| UPP1         | 0,018925464 | 1,54 | uridine phosphorylase 1                                                                  |
| HIPK2        | 0,016111031 | 1,53 | homeodomain interacting protein kinase 2                                                 |
| CYFIP2       | 0,032073993 | 1,53 | cytoplasmic FMR1 interacting protein 2                                                   |
| TRAFD1       | 0,017252121 | 1,52 | TRAF-type zinc finger domain containing 1                                                |
| CD97         | 0,04029774  | 1,52 | CD97 molecule                                                                            |
| PTGER4       | 0,035188415 | 1,51 | prostaglandin E receptor 4 (subtype EP4)                                                 |
| RUFY3        | 0,033109948 | 1,51 | RUN and FYVE domain containing 3                                                         |
| DOCK8        | 0,003307121 | 1,50 | dedicator of cytokinesis 8                                                               |
| LOC100289533 | 0,003619948 | 1,50 | uncharacterized LOC100289533                                                             |
| GAL          | 0,036803238 | 1,49 | galanin/GMAP prepropeptide                                                               |
| BAI1         | 0,010636839 | 1,49 | brain-specific angiogenesis inhibitor 1                                                  |
| PALLD        | 0,00079014  | 1,49 | palladin, cytoskeletal associated protein                                                |
| LINC00847    | 0,018579295 | 1,48 | long intergenic non-protein coding RNA 847                                               |
| ZDHHC18      | 0,030339052 | 1,48 | zinc finger, DHHC-type containing 18                                                     |
| PACS1        | 0,003212011 | 1,48 | phosphofurin acidic cluster sorting protein 1                                            |
| TBC1D1       | 0,013307413 | 1,47 | TBC1 (tre-2/USP6, BUB2, cdc16) domain family, member 1                                   |
| FMNL2        | 0,008924837 | 1,47 | formin-like 2                                                                            |
| FOXO1        | 0,028431173 | 1,46 | forkhead box O1                                                                          |
| DLGAP4       | 0,013670143 | 1,46 | discs, large (Drosophila) homolog-associated protein 4                                   |
| VWCE         | 0,004585029 | 1,45 | von Willebrand factor C and EGF domains                                                  |
| ASB9         | 0,028211439 | 1,45 | ankyrin repeat and SOCS box containing 9                                                 |
| PC           | 0,010636839 | 1,45 | pyruvate carboxylase                                                                     |
| GEM          | 0,013391517 | 1,44 | GTP binding protein overexpressed in skeletal muscle                                     |
| TRAV12-2     | 0,046736442 | 1,44 | T cell receptor alpha variable 12-2                                                      |
| SLC22A23     | 0,035188415 | 1,44 | solute carrier family 22, member 23                                                      |
| SPOCD1       | 0,026751204 | 1,43 | SPOC domain containing 1                                                                 |

|              |             |      |                                                                                          |
|--------------|-------------|------|------------------------------------------------------------------------------------------|
| PRR5L        | 0,010088172 | 1,43 | proline rich 5 like                                                                      |
| PLA2G15      | 0,049290329 | 1,43 | phospholipase A2, group XV                                                               |
| BACE1        | 0,029628827 | 1,43 | beta-site APP-cleaving enzyme 1                                                          |
| ZNF732       | 0,042362266 | 1,43 | zinc finger protein 732                                                                  |
| WFS1         | 0,026394663 | 1,43 | Wolfram syndrome 1 (wolframin)                                                           |
| KLHL6        | 0,012543702 | 1,42 | kelch-like family member 6                                                               |
| TMC8         | 0,006424162 | 1,42 | transmembrane channel-like 8                                                             |
| MTSS1        | 0,016087396 | 1,41 | metastasis suppressor 1                                                                  |
| LOC100506928 | 0,020506014 | 1,41 | uncharacterized LOC100506928                                                             |
| MFSD12       | 0,013670143 | 1,40 | major facilitator superfamily domain containing 12                                       |
| PI4K2A       | 0,048825732 | 1,40 | phosphatidylinositol 4-kinase type 2 alpha                                               |
| C19orf60     | 0,007949832 | 1,39 | chromosome 19 open reading frame 60                                                      |
| TMC6         | 0,047758353 | 1,39 | transmembrane channel-like 6                                                             |
| CADPS2       | 0,004626759 | 1,39 | Ca <sup>++</sup> -dependent secretion activator 2                                        |
| PDE6G        | 0,013501033 | 1,38 | phosphodiesterase 6G, cGMP-specific, rod, gamma                                          |
| RASSF3       | 0,006424162 | 1,38 | Ras association (RalGDS/AF-6) domain family member 3                                     |
| RNF207       | 0,018925464 | 1,38 | ring finger protein 207                                                                  |
| CYP27A1      | 0,042374321 | 1,38 | cytochrome P450, family 27, subfamily A, polypeptide 1                                   |
| PGBD5        | 0,038626888 | 1,37 | piggyBac transposable element derived 5                                                  |
| SLC28A3      | 0,012729886 | 1,37 | solute carrier family 28 (concentrative nucleoside transporter), member 3                |
| TNFRSF12A    | 0,039903772 | 1,36 | tumor necrosis factor receptor superfamily, member 12A                                   |
| CA14         | 0,005123585 | 1,36 | carbonic anhydrase XIV                                                                   |
| TCIRG1       | 0,024088086 | 1,35 | T-cell, immune regulator 1, ATPase, H <sup>+</sup> transporting, lysosomal V0 subunit A3 |
| UG0898H09    | 0,029628827 | 1,35 | uncharacterized LOC643763                                                                |
| PCGF2        | 0,009633151 | 1,34 | polycomb group ring finger 2                                                             |
| NDST1        | 0,042362266 | 1,34 | N-deacetylase/N-sulfotransferase (heparan glucosaminyl) 1                                |
| HCP5         | 0,030415845 | 1,34 | HLA complex P5 (non-protein coding)                                                      |
| CLSTN1       | 0,032451965 | 1,34 | calsyntenin 1                                                                            |
| ZNF703       | 0,034828727 | 1,33 | zinc finger protein 703                                                                  |



|              |             |      |                                                                                   |
|--------------|-------------|------|-----------------------------------------------------------------------------------|
| LONRF3       | 0,042362266 | 1,33 | LON peptidase N-terminal domain and ring finger 3                                 |
| LOC101927438 | 0,044282374 | 1,33 | uncharacterized LOC101927438                                                      |
| AP4B1-AS1    | 0,022396076 | 1,33 | AP4B1 antisense RNA 1                                                             |
| TNFSF14      | 0,034619967 | 1,33 | tumor necrosis factor (ligand) superfamily, member 14                             |
| JAK1         | 0,004504132 | 1,33 | Janus kinase 1                                                                    |
| TMEM164      | 0,012516633 | 1,33 | transmembrane protein 164                                                         |
| SNORD89      | 0,003815492 | 1,33 | small nucleolar RNA, C/D box 89                                                   |
| CCND1        | 0,042058257 | 1,32 | cyclin D1                                                                         |
| SLC15A1      | 0,036921459 | 1,32 | solute carrier family 15 (oligopeptide transporter), member 1                     |
| TBC1D30      | 0,047095338 | 1,32 | TBC1 domain family, member 30                                                     |
| DOPEY2       | 0,036371377 | 1,31 | dopey family member 2                                                             |
| LOC100506514 | 0,023532351 | 1,31 | uncharacterized LOC100506514                                                      |
| LINC00877    | 0,04272916  | 1,31 | long intergenic non-protein coding RNA 877                                        |
| ZNF454       | 0,020906716 | 1,31 | zinc finger protein 454                                                           |
| RPS19        | 0,006424162 | 1,30 | ribosomal protein S19                                                             |
| KCNMB4       | 0,042362266 | 1,30 | potassium large conductance calcium-activated channel, subfamily M, beta member 4 |

**Suppl. Table 2: Down regulated genes in CD16+ versus CD16-MDDC**

| Symbol    | adj. p      | FC    | description                                                              |
|-----------|-------------|-------|--------------------------------------------------------------------------|
| CDH1      | 4,48E-05    | -8,59 | cadherin 1, type 1, E-cadherin (epithelial)                              |
| RXFP1     | 1,06E-05    | -7,58 | relaxin/insulin-like family peptide receptor 1                           |
| STEAP4    | 0,000967676 | -6,78 | STEAP family member 4                                                    |
| PAK7      | 2,68E-08    | -5,16 | p21 protein (Cdc42/Rac)-activated kinase 7                               |
| CCR6      | 1,74E-07    | -3,91 | chemokine (C-C motif) receptor 6                                         |
| CD163L1   | 0,003432854 | -3,86 | CD163 molecule-like 1                                                    |
| RNASE2    | 0,00846588  | -3,84 | ribonuclease, RNase A family, 2 (liver, eosinophil-derived neurotoxin)   |
| COLEC12   | 6,47E-05    | -3,75 | collectin sub-family member 12                                           |
| PPBP      | 0,016735127 | -3,74 | pro-platelet basic protein (chemokine (C-X-C motif) ligand 7)            |
| MPO       | 0,003743328 | -3,59 | myeloperoxidase                                                          |
| HRH4      | 0,008015255 | -3,49 | histamine receptor H4                                                    |
| GPR171    | 0,002428325 | -3,44 | G protein-coupled receptor 171                                           |
| IL17RB    | 0,00079014  | -3,39 | interleukin 17 receptor B                                                |
| PTGER3    | 5,65E-05    | -3,31 | prostaglandin E receptor 3 (subtype EP3)                                 |
| SLC40A1   | 0,007700021 | -3,29 | solute carrier family 40 (iron-regulated transporter), member 1          |
| ME1       | 0,00730176  | -3,23 | malic enzyme 1, NADP(+)-dependent, cytosolic                             |
| MIR146B   | 0,009004086 | -3,20 | microRNA 146b                                                            |
| DUOXA1    | 4,48E-05    | -2,98 | dual oxidase maturation factor 1                                         |
| ITGA9     | 0,014365449 | -2,96 | integrin, alpha 9                                                        |
| DUOX1     | 0,000150649 | -2,95 | dual oxidase 1                                                           |
| TOX       | 0,000203362 | -2,94 | thymocyte selection-associated high mobility group box                   |
| CPA3      | 0,00330199  | -2,93 | carboxypeptidase A3 (mast cell)                                          |
| HIST1H2AJ | 0,005560076 | -2,92 | histone cluster 1, H2aj                                                  |
| CCL18     | 0,038436376 | -2,83 | chemokine (C-C motif) ligand 18 (pulmonary and activation-regulated)     |
| ATP1B2    | 0,006424162 | -2,73 | ATPase, Na <sup>+</sup> /K <sup>+</sup> transporting, beta 2 polypeptide |
| ALOX5AP   | 0,005886239 | -2,69 | arachidonate 5-lipoxygenase-activating protein                           |
| FZD3      | 0,000969723 | -2,65 | frizzled class receptor 3                                                |

|              |             |       |                                                                                                        |
|--------------|-------------|-------|--------------------------------------------------------------------------------------------------------|
| PROS1        | 0,000699561 | -2,64 | protein S (alpha)                                                                                      |
| TMPRSS13     | 0,009206754 | -2,56 | transmembrane protease, serine 13                                                                      |
| ZNF827       | 0,010067462 | -2,53 | zinc finger protein 827                                                                                |
| SERPINF1     | 4,75E-05    | -2,51 | serpin peptidase inhibitor, clade F (alpha-2 antiplasmin, pigment epithelium derived factor), member 1 |
| HIST1H2BM    | 0,020906716 | -2,50 | histone cluster 1, H2bm                                                                                |
| GGT5         | 0,000199888 | -2,49 | gamma-glutamyltransferase 5                                                                            |
| SCN9A        | 0,012516633 | -2,48 | sodium channel, voltage-gated, type IX, alpha subunit                                                  |
| IGJ          | 0,021343315 | -2,43 | immunoglobulin J polypeptide, linker protein for immunoglobulin alpha and mu polypeptides              |
| NFXL1        | 0,015958926 | -2,41 | nuclear transcription factor, X-box binding-like 1                                                     |
| TSPAN15      | 0,00330199  | -2,40 | tetraspanin 15                                                                                         |
| CREB3L1      | 0,000687329 | -2,38 | cAMP responsive element binding protein 3-like 1                                                       |
| ADAM23       | 0,001345084 | -2,38 | ADAM metallopeptidase domain 23                                                                        |
| CDH2         | 0,005938694 | -2,34 | cadherin 2, type 1, N-cadherin (neuronal)                                                              |
| SIGLEC1      | 6,47E-05    | -2,31 | sialic acid binding Ig-like lectin 1, sialoadhesin                                                     |
| MYBL1        | 7,85E-06    | -2,31 | v-myb avian myeloblastosis viral oncogene homolog-like 1                                               |
| RAB27B       | 0,01514017  | -2,30 | RAB27B, member RAS oncogene family                                                                     |
| EPCAM        | 2,27E-05    | -2,27 | epithelial cell adhesion molecule                                                                      |
| LSR          | 0,033101676 | -2,27 | lipolysis stimulated lipoprotein receptor                                                              |
| CRH          | 9,36E-05    | -2,26 | corticotropin releasing hormone                                                                        |
| TSPAN7       | 0,045708897 | -2,24 | tetraspanin 7                                                                                          |
| CLEC4G       | 0,001997598 | -2,22 | C-type lectin domain family 4, member G                                                                |
| CD34         | 0,008015255 | -2,20 | CD34 molecule                                                                                          |
| SMARCA1      | 0,005938694 | -2,18 | SWI/SNF related, matrix associated, actin dependent regulator of chromatin, subfamily a, member 1      |
| NUP107       | 7,85E-06    | -2,18 | nucleoporin 107kDa                                                                                     |
| SNORD75      | 0,005952553 | -2,14 | small nucleolar RNA, C/D box 75                                                                        |
| GIPC3        | 0,005119835 | -2,11 | GIPC PDZ domain containing family, member 3                                                            |
| TPX2         | 0,006615125 | -2,10 | TPX2, microtubule-associated                                                                           |
| RALGPS2      | 0,002491484 | -2,08 | Ral GEF with PH domain and SH3 binding motif 2                                                         |
| LOC101927780 | 0,000199888 | -2,05 | uncharacterized LOC101927780                                                                           |

|              |             |       |                                                                                       |
|--------------|-------------|-------|---------------------------------------------------------------------------------------|
| CST7         | 0,000398548 | -2,04 | cystatin F (leukocystatin)                                                            |
| FAM189A2     | 0,032829728 | -2,04 | family with sequence similarity 189, member A2                                        |
| ZNF480       | 0,003432854 | -2,04 | zinc finger protein 480                                                               |
| SLC2A1       | 0,009101532 | -2,03 | solute carrier family 2 (facilitated glucose transporter), member 1                   |
| SH3PXD2B     | 0,015493578 | -2,03 | SH3 and PX domains 2B                                                                 |
| PPAP2A       | 0,016111031 | -2,00 | phosphatidic acid phosphatase type 2A                                                 |
| TOP2A        | 0,012543702 | -1,99 | topoisomerase (DNA) II alpha 170kDa                                                   |
| DNM1         | 0,006424162 | -1,99 | dynamamin 1                                                                           |
| LOC101928161 | 0,014294496 | -1,96 | uncharacterized LOC101928161                                                          |
| MSI2         | 0,014365449 | -1,96 | musashi RNA-binding protein 2                                                         |
| GAPT         | 0,015493578 | -1,94 | GRB2-binding adaptor protein, transmembrane                                           |
| CLEC4M       | 0,012516633 | -1,93 | C-type lectin domain family 4, member M                                               |
| CRIM1        | 0,038436376 | -1,93 | cysteine rich transmembrane BMP regulator 1 (chordin-like)                            |
| FNBP1L       | 0,020722946 | -1,93 | formin binding protein 1-like                                                         |
| DNASE1L3     | 0,008149648 | -1,91 | deoxyribonuclease I-like 3                                                            |
| CCNA1        | 0,012768831 | -1,91 | cyclin A1                                                                             |
| SGCB         | 0,036921459 | -1,90 | sarcoglycan, beta (43kDa dystrophin-associated glycoprotein)                          |
| SLC22A5      | 0,003743328 | -1,89 | solute carrier family 22 (organic cation/carnitine transporter), member 5             |
| CECR2        | 0,008677393 | -1,88 | cat eye syndrome chromosome region, candidate 2                                       |
| HSPA2        | 0,019422107 | -1,87 | heat shock 70kDa protein 2                                                            |
| SLC35F3      | 0,032670604 | -1,86 | solute carrier family 35, member F3                                                   |
| NCR3LG1      | 0,014348784 | -1,85 | natural killer cell cytotoxicity receptor 3 ligand 1                                  |
| TULP3        | 0,004766439 | -1,83 | tubby like protein 3                                                                  |
| ESCO2        | 0,005560076 | -1,81 | establishment of sister chromatid cohesion N-acetyltransferase 2                      |
| SKA3         | 0,010088172 | -1,80 | spindle and kinetochore associated complex subunit 3                                  |
| RCBTB2       | 0,00061286  | -1,80 | regulator of chromosome condensation (RCC1) and BTB (POZ) domain containing protein 2 |
| ID3          | 0,025521001 | -1,80 | inhibitor of DNA binding 3, dominant negative helix-loop-helix protein                |
| KIF11        | 0,006434531 | -1,78 | kinesin family member 11                                                              |
| SNHG19       | 0,043947273 | -1,78 | small nucleolar RNA host gene 19 (non-protein coding)                                 |

|           |             |       |                                                                   |
|-----------|-------------|-------|-------------------------------------------------------------------|
| SAMD9     | 0,005999118 | -1,75 | sterile alpha motif domain containing 9                           |
| FAM171B   | 0,048060436 | -1,74 | family with sequence similarity 171, member B                     |
| PLEK2     | 0,018398082 | -1,74 | pleckstrin 2                                                      |
| LONRF1    | 0,003432854 | -1,74 | LON peptidase N-terminal domain and ring finger 1                 |
| EIF2AK2   | 0,013526454 | -1,73 | eukaryotic translation initiation factor 2-alpha kinase 2         |
| S100B     | 0,004155399 | -1,72 | S100 calcium binding protein B                                    |
| HSPA4L    | 0,049536531 | -1,71 | heat shock 70kDa protein 4-like                                   |
| ESAM      | 0,00330199  | -1,71 | endothelial cell adhesion molecule                                |
| DDIT3     | 0,001436212 | -1,71 | DNA-damage-inducible transcript 3                                 |
| HR        | 0,000199888 | -1,71 | hair growth associated                                            |
| ADHFE1    | 0,021154624 | -1,70 | alcohol dehydrogenase, iron containing, 1                         |
| PRSS36    | 0,000969723 | -1,70 | protease, serine, 36                                              |
| TXLNB     | 0,013670143 | -1,69 | taxilin beta                                                      |
| GCNT1     | 0,032616994 | -1,69 | glucosaminyl (N-acetyl) transferase 1, core 2                     |
| MIR503    | 0,005502371 | -1,69 | microRNA 503                                                      |
| KBTBD7    | 0,010977951 | -1,68 | kelch repeat and BTB (POZ) domain containing 7                    |
| CDR2L     | 0,006927827 | -1,68 | cerebellar degeneration-related protein 2-like                    |
| HIST1H2BL | 0,035886512 | -1,68 | histone cluster 1, H2bl                                           |
| C9orf72   | 0,005886239 | -1,67 | chromosome 9 open reading frame 72                                |
| BUB1      | 0,017612594 | -1,66 | BUB1 mitotic checkpoint serine/threonine kinase                   |
| LINC00967 | 0,015493578 | -1,66 | long intergenic non-protein coding RNA 967                        |
| EZH2      | 0,016735127 | -1,65 | enhancer of zeste 2 polycomb repressive complex 2 subunit         |
| TRIM15    | 0,003946823 | -1,65 | tripartite motif containing 15                                    |
| ABCC4     | 0,000411135 | -1,65 | ATP-binding cassette, sub-family C (CFTR/MRP), member 4           |
| MIR4499   | 0,024937371 | -1,64 | microRNA 4499                                                     |
| SELL      | 0,035023187 | -1,64 | selectin L                                                        |
| SYCP2     | 0,044034996 | -1,63 | synaptonemal complex protein 2                                    |
| IL1RL2    | 0,005345224 | -1,63 | interleukin 1 receptor-like 2                                     |
| RNF138P1  | 0,029646979 | -1,63 | ring finger protein 138, E3 ubiquitin protein ligase pseudogene 1 |

|          |             |       |                                                                               |
|----------|-------------|-------|-------------------------------------------------------------------------------|
| RNASE1   | 0,008598691 | -1,62 | ribonuclease, RNase A family, 1 (pancreatic)                                  |
| IGFBP7   | 0,001355833 | -1,62 | insulin-like growth factor binding protein 7                                  |
| SLC44A1  | 0,00399585  | -1,62 | solute carrier family 44 (choline transporter), member 1                      |
| PKP2     | 0,007283765 | -1,62 | plakophilin 2                                                                 |
| ITM2C    | 0,01800465  | -1,62 | integral membrane protein 2C                                                  |
| MKI67    | 0,008015255 | -1,61 | marker of proliferation Ki-67                                                 |
| HCAR3    | 0,006250764 | -1,61 | hydroxycarboxylic acid receptor 3                                             |
| TFAP2C   | 0,012205232 | -1,61 | transcription factor AP-2 gamma (activating enhancer binding protein 2 gamma) |
| AIG1     | 0,010636839 | -1,60 | androgen-induced 1                                                            |
| TRIM15   | 0,005938694 | -1,59 | tripartite motif containing 15                                                |
| TRIM15   | 0,005938694 | -1,59 | tripartite motif containing 15                                                |
| TRIM15   | 0,005938694 | -1,59 | tripartite motif containing 15                                                |
| IKZF4    | 0,004504132 | -1,59 | IKAROS family zinc finger 4 (Eos)                                             |
| TRIM15   | 0,005886239 | -1,58 | tripartite motif containing 15                                                |
| TRIM15   | 0,005886239 | -1,58 | tripartite motif containing 15                                                |
| TRIM15   | 0,005886239 | -1,58 | tripartite motif containing 15                                                |
| C4orf32  | 0,018773627 | -1,58 | chromosome 4 open reading frame 32                                            |
| NUSAP1   | 0,005938694 | -1,58 | nucleolar and spindle associated protein 1                                    |
| NCKAP5   | 0,018150712 | -1,58 | NCK-associated protein 5                                                      |
| EDDM3A   | 0,046736442 | -1,58 | epididymal protein 3A                                                         |
| BANK1    | 0,003815492 | -1,58 | B-cell scaffold protein with ankyrin repeats 1                                |
| KIT      | 0,038436376 | -1,58 | v-kit Hardy-Zuckerman 4 feline sarcoma viral oncogene homolog                 |
| HSPA12B  | 0,013249297 | -1,57 | heat shock 70kD protein 12B                                                   |
| WDFY2    | 0,018599272 | -1,56 | WD repeat and FYVE domain containing 2                                        |
| SLX4IP   | 0,00846588  | -1,56 | SLX4 interacting protein                                                      |
| ICA1     | 0,01294825  | -1,55 | islet cell autoantigen 1, 69kDa                                               |
| SGOL1    | 0,048060436 | -1,55 | shugoshin-like 1 (S. pombe)                                                   |
| CRYM-AS1 | 0,01446133  | -1,55 | CRYM antisense RNA 1                                                          |
| RFC4     | 0,004504132 | -1,55 | replication factor C (activator 1) 4, 37kDa                                   |

|              |             |       |                                                                              |
|--------------|-------------|-------|------------------------------------------------------------------------------|
| FAM95B1      | 0,046173976 | -1,55 | family with sequence similarity 95, member B1                                |
| DEPDC1B      | 0,04501606  | -1,54 | DEP domain containing 1B                                                     |
| TRIM15       | 0,010411394 | -1,54 | tripartite motif containing 15                                               |
| MVB12B       | 0,0148961   | -1,54 | multivesicular body subunit 12B                                              |
| PDCD1LG2     | 0,005886239 | -1,54 | programmed cell death 1 ligand 2                                             |
| CCNE2        | 0,017612594 | -1,54 | cyclin E2                                                                    |
| KDEL2        | 0,012345555 | -1,54 | KDEL (Lys-Asp-Glu-Leu) containing 2                                          |
| TIPIN        | 0,010407667 | -1,53 | TIMELESS interacting protein                                                 |
| SVIL         | 0,036921459 | -1,53 | supervillin                                                                  |
| RNF24        | 0,00501938  | -1,53 | ring finger protein 24                                                       |
| CDCA7L       | 0,006424162 | -1,52 | cell division cycle associated 7-like                                        |
| IGF2BP2      | 0,042362266 | -1,52 | insulin-like growth factor 2 mRNA binding protein 2                          |
| PCMTD2       | 0,003589583 | -1,52 | protein-L-isoaspartate (D-aspartate) O-methyltransferase domain containing 2 |
| ZCCHC7       | 0,004905648 | -1,52 | zinc finger, CCHC domain containing 7                                        |
| LOC100288814 | 0,020041698 | -1,52 | uncharacterized LOC100288814                                                 |
| PGAP1        | 0,048026791 | -1,51 | post-GPI attachment to proteins 1                                            |
| GPSM2        | 0,023641524 | -1,51 | G-protein signaling modulator 2                                              |
| FOXQ1        | 0,020286374 | -1,51 | forkhead box Q1                                                              |
| ST8SIA4      | 0,024937371 | -1,51 | ST8 alpha-N-acetyl-neuraminide alpha-2,8-sialyltransferase 4                 |
| B3GALNT1     | 0,005560076 | -1,51 | beta-1,3-N-acetylgalactosaminyltransferase 1 (globoside blood group)         |
| PRIM1        | 0,013015434 | -1,50 | primase, DNA, polypeptide 1 (49kDa)                                          |
| BRCA2        | 0,027977573 | -1,50 | breast cancer 2, early onset                                                 |
| TWSG1        | 0,046946294 | -1,50 | twisted gastrulation BMP signaling modulator 1                               |
| ZNF383       | 0,036803238 | -1,50 | zinc finger protein 383                                                      |
| TMEM255B     | 0,045104724 | -1,49 | transmembrane protein 255B                                                   |
| MBOAT2       | 0,006484723 | -1,49 | membrane bound O-acyltransferase domain containing 2                         |
| STX2         | 0,009413945 | -1,49 | syntaxin 2                                                                   |
| SHCBP1       | 0,008175731 | -1,49 | SHC SH2-domain binding protein 1                                             |
| RRS1-AS1     | 0,048059158 | -1,49 | RRS1 antisense RNA 1 (head to head)                                          |

|           |             |       |                                                                                         |
|-----------|-------------|-------|-----------------------------------------------------------------------------------------|
| RHPN1-AS1 | 0,012543702 | -1,49 | RHPN1 antisense RNA 1 (head to head)                                                    |
| MAP1A     | 0,012669679 | -1,49 | microtubule-associated protein 1A                                                       |
| ARL4A     | 0,008366345 | -1,48 | ADP-ribosylation factor-like 4A                                                         |
| NFE2      | 0,013391517 | -1,48 | nuclear factor, erythroid 2                                                             |
| KBTBD11   | 0,006424162 | -1,48 | kelch repeat and BTB (POZ) domain containing 11                                         |
| CLDN4     | 0,026610987 | -1,48 | claudin 4                                                                               |
| KIF20B    | 0,022458066 | -1,48 | kinesin family member 20B                                                               |
| KIF15     | 0,031101368 | -1,48 | kinesin family member 15                                                                |
| SNTB1     | 0,007853219 | -1,48 | syntrophin, beta 1 (dystrophin-associated protein A1, 59kDa, basic component 1)         |
| LRRCC1    | 0,049536531 | -1,47 | leucine rich repeat and coiled-coil centrosomal protein 1                               |
| NCR3LG1   | 0,011384085 | -1,47 | natural killer cell cytotoxicity receptor 3 ligand 1                                    |
| FLJ22447  | 0,016087396 | -1,47 | uncharacterized LOC400221                                                               |
| HIF1A     | 0,000716838 | -1,47 | hypoxia inducible factor 1, alpha subunit (basic helix-loop-helix transcription factor) |
| AKR1B1    | 0,048060436 | -1,46 | aldo-keto reductase family 1, member B1 (aldose reductase)                              |
| CWF19L1   | 0,022396076 | -1,46 | CWF19-like 1, cell cycle control (S. pombe)                                             |
| STIL      | 0,035608235 | -1,46 | SCL/TAL1 interrupting locus                                                             |
| LYRM7     | 0,005350352 | -1,46 | LYR motif containing 7                                                                  |
| TGFBR1    | 0,012926609 | -1,45 | transforming growth factor, beta receptor 1                                             |
| ACAP1     | 0,039439794 | -1,45 | ArfGAP with coiled-coil, ankyrin repeat and PH domains 1                                |
| ZNF823    | 0,038551127 | -1,45 | zinc finger protein 823                                                                 |
| STOX2     | 0,020299151 | -1,45 | storkhead box 2                                                                         |
| RFC3      | 0,017185822 | -1,45 | replication factor C (activator 1) 3, 38kDa                                             |
| SMAGP     | 0,048413261 | -1,45 | small cell adhesion glycoprotein                                                        |
| LINC01150 | 0,013249297 | -1,44 | long intergenic non-protein coding RNA 1150                                             |
| TAF4B     | 0,044199813 | -1,44 | TAF4b RNA polymerase II, TATA box binding protein (TBP)-associated factor, 105kDa       |
| RBM22     | 0,000147152 | -1,44 | RNA binding motif protein 22                                                            |
| RB1       | 0,005886239 | -1,44 | retinoblastoma 1                                                                        |
| SPIN4     | 0,006250764 | -1,44 | spindlin family, member 4                                                               |
| SCN5A     | 0,039819189 | -1,44 | sodium channel, voltage-gated, type V, alpha subunit                                    |



|          |             |       |                                                                  |
|----------|-------------|-------|------------------------------------------------------------------|
| CTTNBP2  | 0,027413904 | -1,44 | cortactin binding protein 2                                      |
| PEAK1    | 0,048650506 | -1,44 | pseudopodium-enriched atypical kinase 1                          |
| AK2      | 0,006822062 | -1,44 | adenylate kinase 2                                               |
| GLIS2    | 0,015229132 | -1,44 | GLIS family zinc finger 2                                        |
| DSTNP2   | 0,028438957 | -1,43 | destrin (actin depolymerizing factor) pseudogene 2               |
| IFT74    | 0,016139908 | -1,43 | intraflagellar transport 74                                      |
| ANLN     | 0,033720643 | -1,43 | anillin, actin binding protein                                   |
| PIBF1    | 0,00873694  | -1,43 | progesterone immunomodulatory binding factor 1                   |
| TRIM10   | 0,015958926 | -1,43 | tripartite motif containing 10                                   |
| ALMS1    | 0,036921459 | -1,42 | Alstrom syndrome 1                                               |
| CACNA2D4 | 0,030507412 | -1,42 | calcium channel, voltage-dependent, alpha 2/delta subunit 4      |
| NSUN6    | 0,04501606  | -1,42 | NOP2/Sun domain family, member 6                                 |
| ZDHHC2   | 0,023005619 | -1,42 | zinc finger, DHHC-type containing 2                              |
| CAPN2    | 0,035023187 | -1,41 | calpain 2, (m/II) large subunit                                  |
| C6orf25  | 0,017706592 | -1,41 | chromosome 6 open reading frame 25                               |
| C6orf25  | 0,017706592 | -1,41 | chromosome 6 open reading frame 25                               |
| C6orf25  | 0,017706592 | -1,41 | chromosome 6 open reading frame 25                               |
| C6orf25  | 0,017706592 | -1,41 | chromosome 6 open reading frame 25                               |
| CBFB     | 0,010952307 | -1,41 | core-binding factor, beta subunit                                |
| CHDH     | 0,035188415 | -1,40 | choline dehydrogenase                                            |
| GRIN3B   | 0,020227341 | -1,40 | glutamate receptor, ionotropic, N-methyl-D-aspartate 3B          |
| MPP5     | 0,036921459 | -1,40 | membrane protein, palmitoylated 5 (MAGUK p55 subfamily member 5) |
| ALG6     | 0,008895971 | -1,40 | ALG6, alpha-1,3-glucosyltransferase                              |
| KIAA0825 | 0,048060436 | -1,40 | KIAA0825                                                         |
| POLD2    | 0,029376149 | -1,40 | polymerase (DNA directed), delta 2, accessory subunit            |
| CENPI    | 0,032451965 | -1,40 | centromere protein I                                             |
| CDKN2C   | 0,011349411 | -1,39 | cyclin-dependent kinase inhibitor 2C (p18, inhibits CDK4)        |
| HPSE     | 0,008924837 | -1,39 | heparanase                                                       |
| LCLAT1   | 0,00822055  | -1,39 | lysocardiolipin acyltransferase 1                                |

|           |             |       |                                                                      |
|-----------|-------------|-------|----------------------------------------------------------------------|
| C6orf25   | 0,013526454 | -1,39 | chromosome 6 open reading frame 25                                   |
| MCM8      | 0,010407667 | -1,39 | minichromosome maintenance complex component 8                       |
| PBLD      | 0,007853219 | -1,39 | phenazine biosynthesis-like protein domain containing                |
| LYSMD3    | 0,039658199 | -1,38 | LysM, putative peptidoglycan-binding, domain containing 3            |
| RNF168    | 0,036921459 | -1,38 | ring finger protein 168, E3 ubiquitin protein ligase                 |
| SLC37A1   | 0,048650506 | -1,38 | solute carrier family 37 (glucose-6-phosphate transporter), member 1 |
| LNX2      | 0,026159721 | -1,38 | ligand of numb-protein X 2                                           |
| SAMD9L    | 0,022941834 | -1,38 | sterile alpha motif domain containing 9-like                         |
| SNAI1     | 0,016958742 | -1,38 | snail family zinc finger 1                                           |
| APMAP     | 0,013391517 | -1,38 | adipocyte plasma membrane associated protein                         |
| IFI16     | 0,035023187 | -1,38 | interferon, gamma-inducible protein 16                               |
| ATAD2     | 0,02593725  | -1,37 | ATPase family, AAA domain containing 2                               |
| OXCT1     | 0,046645784 | -1,37 | 3-oxoacid CoA transferase 1                                          |
| PHF10     | 0,043438334 | -1,37 | PHD finger protein 10                                                |
| LTBP1     | 0,017706592 | -1,37 | latent transforming growth factor beta binding protein 1             |
| CKS2      | 0,022134562 | -1,37 | CDC28 protein kinase regulatory subunit 2                            |
| MAFA      | 0,029628827 | -1,37 | v-maf avian musculoaponeurotic fibrosarcoma oncogene homolog A       |
| MCUR1     | 0,041582811 | -1,37 | mitochondrial calcium uniporter regulator 1                          |
| WDR76     | 0,017612594 | -1,36 | WD repeat domain 76                                                  |
| ZNF268    | 0,026528057 | -1,36 | zinc finger protein 268                                              |
| NRSN2     | 0,034619967 | -1,36 | neurensin 2                                                          |
| POLA2     | 0,01060777  | -1,36 | polymerase (DNA directed), alpha 2, accessory subunit                |
| PIGM      | 0,041149605 | -1,36 | phosphatidylinositol glycan anchor biosynthesis, class M             |
| LOC728323 | 0,038626888 | -1,36 | uncharacterized LOC728323                                            |
| SMC4      | 0,013291554 | -1,36 | structural maintenance of chromosomes 4                              |
| ZNF280D   | 0,018064564 | -1,35 | zinc finger protein 280D                                             |
| PARBP     | 0,001614762 | -1,35 | PARP1 binding protein                                                |
| GTF2F2    | 0,005312877 | -1,35 | general transcription factor IIF, polypeptide 2, 30kDa               |
| LANCL1    | 0,006629956 | -1,35 | LanC lantibiotic synthetase component C-like 1 (bacterial)           |

|           |             |       |                                                                                  |
|-----------|-------------|-------|----------------------------------------------------------------------------------|
| FAM101B   | 0,036921459 | -1,35 | family with sequence similarity 101, member B                                    |
| RRM2      | 0,042362266 | -1,35 | ribonucleotide reductase M2                                                      |
| TAF9B     | 0,025308058 | -1,35 | TAF9B RNA polymerase II, TATA box binding protein (TBP)-associated factor, 31kDa |
| WDR89     | 0,018287459 | -1,35 | WD repeat domain 89                                                              |
| SLC16A5   | 0,030379263 | -1,35 | solute carrier family 16 (monocarboxylate transporter), member 5                 |
| CHAF1B    | 0,005560076 | -1,35 | chromatin assembly factor 1, subunit B (p60)                                     |
| THOC1     | 0,015493578 | -1,34 | THO complex 1                                                                    |
| FANCD2    | 0,024359738 | -1,34 | Fanconi anemia, complementation group D2                                         |
| ANP32E    | 0,035188415 | -1,34 | acidic (leucine-rich) nuclear phosphoprotein 32 family, member E                 |
| RABL3     | 0,025889635 | -1,34 | RAB, member of RAS oncogene family-like 3                                        |
| WDR91     | 0,012768831 | -1,34 | WD repeat domain 91                                                              |
| C6orf25   | 0,038754116 | -1,34 | chromosome 6 open reading frame 25                                               |
| IFT80     | 0,04272916  | -1,34 | intraflagellar transport 80                                                      |
| TMEM106B  | 0,03899335  | -1,34 | transmembrane protein 106B                                                       |
| TUBGCP4   | 0,011377838 | -1,34 | tubulin, gamma complex associated protein 4                                      |
| MCM4      | 0,040576794 | -1,34 | minichromosome maintenance complex component 4                                   |
| C12orf65  | 0,0148961   | -1,34 | chromosome 12 open reading frame 65                                              |
| ANO10     | 0,035886512 | -1,34 | anoctamin 10                                                                     |
| LOC286058 | 0,032451965 | -1,33 | uncharacterized LOC286058                                                        |
| RRP1B     | 0,034145192 | -1,32 | ribosomal RNA processing 1B                                                      |
| LOC284023 | 0,021343315 | -1,32 | uncharacterized LOC284023                                                        |
| ALG9      | 0,038436376 | -1,32 | ALG9, alpha-1,2-mannosyltransferase                                              |
| SKP2      | 0,019437303 | -1,32 | S-phase kinase-associated protein 2, E3 ubiquitin protein ligase                 |
| CTPS2     | 0,049822679 | -1,32 | CTP synthase 2                                                                   |
| C5orf42   | 0,022993709 | -1,31 | chromosome 5 open reading frame 42                                               |
| MNS1      | 0,039439794 | -1,31 | meiosis-specific nuclear structural 1                                            |
| ZNF766    | 0,030507412 | -1,31 | zinc finger protein 766                                                          |
| BPGM      | 0,032878606 | -1,30 | 2,3-bisphosphoglycerate mutase                                                   |
| E2F6      | 0,049651938 | -1,30 | E2F transcription factor 6                                                       |

**Supplemental Table 3: LPS up regulated genes in CD16+ MDDCs**

| Symbol       | adj. p      | FC         | description                                                                    |
|--------------|-------------|------------|--------------------------------------------------------------------------------|
| CCL8         | 0,000677682 | 4,50308442 | chemokine (C-C motif) ligand 8                                                 |
| LOC100507639 | 6,80E-07    | 3,21855039 | uncharacterized LOC100507639                                                   |
| SIGLEC1      | 1,56E-09    | 3,13329865 | sialic acid binding Ig-like lectin 1, sialoadhesin                             |
| MIR4439      | 0,002688544 | 3,05668516 | microRNA 4439                                                                  |
| SCIN         | 7,69E-06    | 2,84738199 | scinderin                                                                      |
| IL7R         | 0,012918023 | 2,27259981 | interleukin 7 receptor                                                         |
| PLTP         | 0,000879659 | 2,26124204 | phospholipid transfer protein                                                  |
| TNF          | 0,000348163 | 2,23862297 | tumor necrosis factor                                                          |
| TNF          | 0,000348163 | 2,23862297 | tumor necrosis factor                                                          |
| TNF          | 0,000348163 | 2,23862297 | tumor necrosis factor                                                          |
| TNF          | 0,000348163 | 2,23862297 | tumor necrosis factor                                                          |
| TNF          | 0,000348163 | 2,23862297 | tumor necrosis factor                                                          |
| TNF          | 0,000348163 | 2,23862297 | tumor necrosis factor                                                          |
| TNF          | 0,000348163 | 2,23862297 | tumor necrosis factor                                                          |
| TNF          | 0,000518666 | 2,23486738 | tumor necrosis factor                                                          |
| LOC644090    | 0,001087289 | 2,22539335 | uncharacterized LOC644090                                                      |
| CFP          | 0,006639592 | 2,17943735 | complement factor properdin                                                    |
| CLU          | 5,09E-05    | 2,16901214 | clusterin                                                                      |
| PAXIP1OS     | 2,21E-05    | 1,93972731 | PAXIP1 opposite strand                                                         |
| ZNF876P      | 0,000922801 | 1,8900249  | zinc finger protein 876, pseudogene                                            |
| SNORD12C     | 0,000408488 | 1,83555893 | small nucleolar RNA, C/D box 12C                                               |
| C2           | 0,00010197  | 1,83236963 | complement component 2                                                         |
| MIR331       | 0,004058197 | 1,81308173 | microRNA 331                                                                   |
| TMEM139      | 0,00026407  | 1,79657414 | transmembrane protein 139                                                      |
| MAP3K8       | 0,003836354 | 1,79076549 | mitogen-activated protein kinase kinase kinase 8                               |
| SNX10        | 0,000296299 | 1,76769641 | sorting nexin 10                                                               |
| CXCL1        | 0,01039801  | 1,76015071 | chemokine (C-X-C motif) ligand 1 (melanoma growth stimulating activity, alpha) |

|               |             |            |                                                                     |
|---------------|-------------|------------|---------------------------------------------------------------------|
| IL18          | 0,003128375 | 1,71234122 | interleukin 18                                                      |
| MIR544A       | 0,003109696 | 1,69905612 | microRNA 544a                                                       |
| ARID5B        | 0,011988904 | 1,69493231 | AT rich interactive domain 5B (MRF1-like)                           |
| H2AFY2        | 0,008305814 | 1,67483419 | H2A histone family, member Y2                                       |
| BCL11A        | 0,00357192  | 1,67295544 | B-cell CLL/lymphoma 11A (zinc finger protein)                       |
| CTD-2270F17.1 | 0,000338803 | 1,66315114 | uncharacterized LOC101928033                                        |
| EPT1          | 0,000298243 | 1,65170358 | ethanolaminephosphotransferase 1 (CDP-ethanolamine-specific)        |
| ELL3          | 0,001040794 | 1,60099507 | elongation factor RNA polymerase II-like 3                          |
| IRG1          | 0,001967929 | 1,59844173 | immunoresponsive 1 homolog (mouse)                                  |
| ZG16B         | 0,012141797 | 1,59682062 | zymogen granule protein 16B                                         |
| NIPAL1        | 0,002075607 | 1,59392558 | NIPA-like domain containing 1                                       |
| PRF1          | 0,003910422 | 1,57527365 | perforin 1 (pore forming protein)                                   |
| ANKRD36       | 0,009295741 | 1,57043233 | ankyrin repeat domain 36                                            |
| HORMAD1       | 0,003621411 | 1,55476078 | HORMA domain containing 1                                           |
| DHCR24        | 0,001569093 | 1,55149432 | 24-dehydrocholesterol reductase                                     |
| B4GALT6       | 0,029790009 | 1,55068917 | UDP-Gal:betaGlcNAc beta 1,4- galactosyltransferase, polypeptide 6   |
| CENPI         | 0,000126771 | 1,54620488 | centromere protein I                                                |
| NUPR1         | 0,007466001 | 1,53073022 | nuclear protein, transcriptional regulator, 1                       |
| SLC2A1        | 0,033277853 | 1,52644641 | solute carrier family 2 (facilitated glucose transporter), member 1 |
| CLIC3         | 0,001082505 | 1,5258458  | chloride intracellular channel 3                                    |
| SCML1         | 0,0018776   | 1,52176284 | sex comb on midleg-like 1 (Drosophila)                              |
| MIR4463       | 0,000876066 | 1,51657936 | microRNA 4463                                                       |
| C17orf96      | 0,002950107 | 1,51016979 | chromosome 17 open reading frame 96                                 |
| CADM1         | 0,003132244 | 1,50309467 | cell adhesion molecule 1                                            |
| PGA3          | 0,006117016 | 1,49969587 | pepsinogen 3, group I (pepsinogen A)                                |
| FAM205B       | 0,002474454 | 1,49819013 | transmembrane protein C9orf144B pseudogene                          |
| GOLGA8H       | 0,004561425 | 1,49116001 | golgin A8 family, member H                                          |
| P2RY8         | 0,039308578 | 1,48832973 | purinergic receptor P2Y, G-protein coupled, 8                       |
| LPIN1         | 0,000540284 | 1,48349351 | lipin 1                                                             |

|              |             |            |                                                                                                        |
|--------------|-------------|------------|--------------------------------------------------------------------------------------------------------|
| STAG3        | 0,001748159 | 1,48341968 | stromal antigen 3                                                                                      |
| ARHGAP5      | 0,001421964 | 1,4831615  | Rho GTPase activating protein 5                                                                        |
| LPAR3        | 0,00220545  | 1,48181635 | lysophosphatidic acid receptor 3                                                                       |
| RIMBP3B      | 0,026419097 | 1,47997201 | RIMS binding protein 3B                                                                                |
| ZFAND6       | 0,02269288  | 1,47916708 | zinc finger, AN1-type domain 6                                                                         |
| VEZT         | 0,000262009 | 1,47575738 | vezatin, adherens junctions transmembrane protein                                                      |
| RABAC1       | 0,000751744 | 1,47440425 | Rab acceptor 1 (prenylated)                                                                            |
| MIR449C      | 0,004192427 | 1,47352356 | microRNA 449c                                                                                          |
| LOC101929057 | 0,008999451 | 1,46521468 | uncharacterized LOC101929057                                                                           |
| SLC50A1      | 0,004462298 | 1,45932297 | solute carrier family 50 (sugar efflux transporter), member 1                                          |
| MIR4772      | 0,003133619 | 1,45871236 | microRNA 4772                                                                                          |
| PAM          | 0,028199043 | 1,45662318 | peptidylglycine alpha-amidating monooxygenase                                                          |
| C9orf72      | 0,005348477 | 1,45006613 | chromosome 9 open reading frame 72                                                                     |
| SLFN12       | 0,000325185 | 1,44762908 | schlafen family member 12                                                                              |
| MVB12A       | 1,52E-05    | 1,44297847 | multivesicular body subunit 12A                                                                        |
| NOLC1        | 0,000568328 | 1,4408301  | nucleolar and coiled-body phosphoprotein 1                                                             |
| SERPINF1     | 0,021264137 | 1,44030529 | serpin peptidase inhibitor, clade F (alpha-2 antiplasmin, pigment epithelium derived factor), member 1 |
| CST7         | 0,010888214 | 1,43848121 | cystatin F (leukocystatin)                                                                             |
| PARP11       | 0,000857381 | 1,43458278 | poly (ADP-ribose) polymerase family, member 11                                                         |
| KIAA1109     | 0,001424278 | 1,43422011 | KIAA1109                                                                                               |
| ARIH2OS      | 7,51E-05    | 1,43275552 | ariadne homolog 2 opposite strand                                                                      |
| RNPS1        | 0,010445309 | 1,43168125 | RNA binding protein S1, serine-rich domain                                                             |
| MPP5         | 0,001815788 | 1,43118765 | membrane protein, palmitoylated 5 (MAGUK p55 subfamily member 5)                                       |
| GK3P         | 0,017234296 | 1,43003179 | glycerol kinase 3 pseudogene                                                                           |
| ARHGAP25     | 0,000533648 | 1,42961735 | Rho GTPase activating protein 25                                                                       |
| OXER1        | 0,005464163 | 1,42709746 | oxoeicosanoid (OXE) receptor 1                                                                         |
| LOC100129781 | 0,003356043 | 1,42617815 | uncharacterized LOC100129781                                                                           |
| STARD5       | 0,046075743 | 1,42616515 | StAR-related lipid transfer (START) domain containing 5                                                |
| OR56B1       | 0,025072828 | 1,42394059 | olfactory receptor, family 56, subfamily B, member 1                                                   |

|              |             |            |                                                                                  |
|--------------|-------------|------------|----------------------------------------------------------------------------------|
| ADPRM        | 0,005416828 | 1,4230329  | ADP-ribose/CDP-alcohol diphosphatase, manganese-dependent                        |
| RND3         | 0,022332021 | 1,42139362 | Rho family GTPase 3                                                              |
| ZFYVE26      | 0,000166252 | 1,42123403 | zinc finger, FYVE domain containing 26                                           |
| NPPA         | 0,000467566 | 1,42033926 | natriuretic peptide A                                                            |
| AIDA         | 0,000718288 | 1,41722541 | axin interactor, dorsalization associated                                        |
| CTPS2        | 0,000456172 | 1,41633478 | CTP synthase 2                                                                   |
| MIR3188      | 0,015275612 | 1,41481707 | microRNA 3188                                                                    |
| TPI1P2       | 0,028116217 | 1,41474728 | triosephosphate isomerase 1 pseudogene 2                                         |
| LOC100190986 | 0,049402386 | 1,4145766  | uncharacterized LOC100190986                                                     |
| MIR4299      | 0,003415548 | 1,41432602 | microRNA 4299                                                                    |
| MIR3945      | 0,000809506 | 1,41399096 | microRNA 3945                                                                    |
| GRHL1        | 0,009316438 | 1,41370092 | grainyhead-like 1 (Drosophila)                                                   |
| LILRA5       | 0,016874502 | 1,41294545 | leukocyte immunoglobulin-like receptor, subfamily A (with TM domain), member 5   |
| KCNMB3       | 0,009919811 | 1,41059707 | potassium large conductance calcium-activated channel, subfamily M beta member 3 |
| EXD2         | 0,000300349 | 1,41051348 | exonuclease 3'-5' domain containing 2                                            |
| BLZF1        | 0,007478875 | 1,40902083 | basic leucine zipper nuclear factor 1                                            |
| TLCD2        | 0,002293498 | 1,4081406  | TLC domain containing 2                                                          |
| PCYT2        | 0,001057193 | 1,40752269 | phosphate cytidylyltransferase 2, ethanolamine                                   |
| TMCO5B       | 0,001484452 | 1,40344728 | transmembrane and coiled-coil domains 5B, pseudogene                             |
| TMEM182      | 0,001355041 | 1,40297926 | transmembrane protein 182                                                        |
| FBXO48       | 0,001822945 | 1,40281935 | F-box protein 48                                                                 |
| CASP10       | 0,006759615 | 1,40276064 | caspase 10, apoptosis-related cysteine peptidase                                 |
| ZC2HC1A      | 0,015727397 | 1,39928268 | zinc finger, C2HC-type containing 1A                                             |
| LOC399815    | 0,002365799 | 1,39918071 | chromosome 10 open reading frame 88 pseudogene                                   |
| LOC100506317 | 0,000243574 | 1,39625043 | uncharacterized LOC100506317                                                     |
| FAM76B       | 0,000317673 | 1,39498332 | family with sequence similarity 76, member B                                     |
| MAGOH        | 0,024356316 | 1,39455538 | mago-nashi homolog, proliferation-associated (Drosophila)                        |
| LOC100506606 | 0,024989857 | 1,39161976 | uncharacterized LOC100506606                                                     |
| C9orf153     | 0,006308072 | 1,39140709 | chromosome 9 open reading frame 153                                              |

|              |             |            |                                                                           |
|--------------|-------------|------------|---------------------------------------------------------------------------|
| SLC13A5      | 0,001938215 | 1,38995217 | solute carrier family 13 (sodium-dependent citrate transporter), member 5 |
| FAM63B       | 0,023515223 | 1,38783324 | family with sequence similarity 63, member B                              |
| CNNM4        | 0,003724751 | 1,38560503 | cyclin and CBS domain divalent metal cation transport mediator 4          |
| AKT1S1       | 0,017440698 | 1,3849948  | AKT1 substrate 1 (proline-rich)                                           |
| PHLDB3       | 0,006056815 | 1,38142824 | pleckstrin homology-like domain, family B, member 3                       |
| XRCC6BP1     | 0,007903342 | 1,37933298 | XRCC6 binding protein 1                                                   |
| MIR135A2     | 0,001560857 | 1,37827315 | microRNA 135a-2                                                           |
| LN2          | 0,00204894  | 1,37824755 | ligand of numb-protein X 2                                                |
| ADAMTS4      | 0,022672526 | 1,37753998 | ADAM metalloproteinase with thrombospondin type 1 motif, 4                |
| NHLRC2       | 0,000303706 | 1,37607056 | NHL repeat containing 2                                                   |
| CCDC71       | 0,000559841 | 1,37606713 | coiled-coil domain containing 71                                          |
| RHOB         | 0,016092785 | 1,3758662  | ras homolog family member B                                               |
| FLJ32255     | 0,019429315 | 1,37378364 | uncharacterized LOC643977                                                 |
| GOLGA2P9     | 0,002644164 | 1,37363144 | golgin A2 pseudogene 9                                                    |
| LOC100128751 | 0,025038245 | 1,37331492 | INM04                                                                     |
| CPLX3        | 0,002484241 | 1,37296903 | complexin 3                                                               |
| MIRLET7D     | 0,017335194 | 1,37223456 | microRNA let-7d                                                           |
| MIR329-2     | 0,013479932 | 1,37186494 | microRNA 329-2                                                            |
| KRTAP5-3     | 0,040136833 | 1,37096191 | keratin associated protein 5-3                                            |
| RAB39B       | 0,000610317 | 1,37039579 | RAB39B, member RAS oncogene family                                        |
| MAATS1       | 4,26E-05    | 1,37027756 | MYCBP-associated, testis expressed 1                                      |
| YME1L1       | 0,006167815 | 1,36981296 | YME1-like 1 ATPase                                                        |
| CXorf28      | 0,043616562 | 1,36866982 | chromosome X open reading frame 28                                        |
| MORC3        | 0,028263738 | 1,36671522 | MORC family CW-type zinc finger 3                                         |
| LOC100288842 | 0,005655877 | 1,3654556  | UDP-GlcNAc:betaGal beta-1,3-N-acetylglucosaminyltransferase 5 pseudogene  |
| CHI3L2       | 0,014971058 | 1,36467808 | chitinase 3-like 2                                                        |
| LINC01191    | 0,041781767 | 1,36459141 | long intergenic non-protein coding RNA 1191                               |
| ZNF462       | 0,011626437 | 1,36332504 | zinc finger protein 462                                                   |
| ARMCX1       | 0,028160031 | 1,36248503 | armadillo repeat containing, X-linked 1                                   |



|           |             |            |                                                                                |
|-----------|-------------|------------|--------------------------------------------------------------------------------|
| FIGNL1    | 0,017637373 | 1,35959347 | fidgetin-like 1                                                                |
| MIR4768   | 0,007391045 | 1,35843762 | microRNA 4768                                                                  |
| LINC01029 | 0,040338523 | 1,35759967 | long intergenic non-protein coding RNA 1029                                    |
| NIPSNAP3B | 0,028271625 | 1,35747209 | nipsnap homolog 3B (C. elegans)                                                |
| SPDYE4    | 0,037563307 | 1,35551325 | speedy/RINGO cell cycle regulator family member E4                             |
| TMEM222   | 0,000194021 | 1,35444662 | transmembrane protein 222                                                      |
| CYP4F24P  | 0,038902246 | 1,3537105  | cytochrome P450, family 4, subfamily F, polypeptide 24, pseudogene             |
| C11orf57  | 0,027154449 | 1,35308729 | chromosome 11 open reading frame 57                                            |
| SLC6A9    | 0,009195176 | 1,35251984 | solute carrier family 6 (neurotransmitter transporter, glycine), member 9      |
| UHRF2     | 0,002758212 | 1,35117278 | ubiquitin-like with PHD and ring finger domains 2, E3 ubiquitin protein ligase |
| CDADC1    | 0,002028727 | 1,35107715 | cytidine and dCMP deaminase domain containing 1                                |
| ADA       | 0,00985111  | 1,35004476 | adenosine deaminase                                                            |
| KIAA1407  | 0,005048555 | 1,35002583 | KIAA1407                                                                       |
| LINC00987 | 0,011978089 | 1,34977712 | long intergenic non-protein coding RNA 987                                     |
| CLDN17    | 0,001283796 | 1,34923821 | claudin 17                                                                     |
| TUBA1B    | 0,025814961 | 1,34760267 | tubulin, alpha 1b                                                              |
| TNIP3     | 0,049660959 | 1,34752035 | TNFAIP3 interacting protein 3                                                  |
| C1orf147  | 0,002394686 | 1,34704972 | chromosome 1 open reading frame 147                                            |
| ADPRHL2   | 0,005058735 | 1,34662944 | ADP-ribosylhydrolase like 2                                                    |
| OR2T2     | 0,010281598 | 1,3463376  | olfactory receptor, family 2, subfamily T, member 2                            |
| TBPL1     | 0,003175773 | 1,34566441 | TBP-like 1                                                                     |
| GNG11     | 0,016612336 | 1,34523783 | guanine nucleotide binding protein (G protein), gamma 11                       |
| MC3R      | 0,001737901 | 1,34492426 | melanocortin 3 receptor                                                        |
| OR7E156P  | 0,008572627 | 1,34432461 | olfactory receptor, family 7, subfamily E, member 156 pseudogene               |
| TM7SF2    | 0,006162234 | 1,34319153 | transmembrane 7 superfamily member 2                                           |
| DMTF1     | 0,011543145 | 1,34297338 | cyclin D binding myb-like transcription factor 1                               |
| LINC00334 | 0,007700963 | 1,34272733 | long intergenic non-protein coding RNA 334                                     |
| MPV17L    | 0,004158699 | 1,34254481 | MPV17 mitochondrial membrane protein-like                                      |
| LOC339622 | 0,002104478 | 1,34241337 | uncharacterized LOC339622                                                      |

|              |             |            |                                                                    |
|--------------|-------------|------------|--------------------------------------------------------------------|
| LOC100129138 | 0,048619287 | 1,34185469 | THAP domain containing, apoptosis associated protein 3 pseudogene  |
| GIN51        | 0,01308078  | 1,34169483 | GIN5 complex subunit 1 (Psf1 homolog)                              |
| SASS6        | 0,01314431  | 1,34047361 | spindle assembly 6 homolog (C. elegans)                            |
| POLN         | 0,001576956 | 1,34016431 | polymerase (DNA directed) nu                                       |
| MIR299       | 0,001016493 | 1,33984359 | microRNA 299                                                       |
| TMEM139      | 0,001674462 | 1,33932864 | transmembrane protein 139                                          |
| TBK1         | 0,00030199  | 1,338563   | TANK-binding kinase 1                                              |
| FAM212A      | 0,003342161 | 1,33841149 | family with sequence similarity 212, member A                      |
| LOC101927056 | 0,03498659  | 1,33835442 | uncharacterized LOC101927056                                       |
| HLA-F-AS1    | 0,041469515 | 1,33788095 | HLA-F antisense RNA 1                                              |
| FRK          | 0,012979768 | 1,33787199 | fyn-related Src family tyrosine kinase                             |
| LOC727896    | 0,006903022 | 1,33637582 | cysteine and histidine-rich domain (CHORD) containing 1 pseudogene |
| C6orf132     | 0,003459234 | 1,33624557 | chromosome 6 open reading frame 132                                |
| JMJD1C-AS1   | 0,005226981 | 1,33477065 | JMJD1C antisense RNA 1                                             |
| LMAN2L       | 0,002676439 | 1,33396407 | lectin, mannose-binding 2-like                                     |
| TIMM8B       | 0,002643197 | 1,33293887 | translocase of inner mitochondrial membrane 8 homolog B (yeast)    |
| RNF144B      | 0,016834267 | 1,33255835 | ring finger protein 144B                                           |
| MTBP         | 0,022923592 | 1,33009826 | MDM2 binding protein                                               |
| KDM4D        | 0,012734482 | 1,32979186 | lysine (K)-specific demethylase 4D                                 |
| FAM127A      | 0,002008726 | 1,32922401 | family with sequence similarity 127, member A                      |
| MACF1        | 0,020785437 | 1,32846746 | microtubule-actin crosslinking factor 1                            |
| TPBG         | 0,023742368 | 1,32821424 | trophoblast glycoprotein                                           |
| CEP192       | 0,015570205 | 1,32785986 | centrosomal protein 192kDa                                         |
| SCPEP1       | 0,008903403 | 1,32734799 | serine carboxypeptidase 1                                          |
| RPARP-AS1    | 0,02356728  | 1,32712918 | RPARP antisense RNA 1                                              |
| MAB21L2      | 0,003172586 | 1,32700495 | mab-21-like 2 (C. elegans)                                         |
| ARL4A        | 0,009127043 | 1,32593625 | ADP-ribosylation factor-like 4A                                    |
| C8orf31      | 0,015657447 | 1,32586317 | chromosome 8 open reading frame 31                                 |
| PERP         | 0,005289507 | 1,32492006 | PERP, TP53 apoptosis effector                                      |

|              |             |            |                                                                                          |
|--------------|-------------|------------|------------------------------------------------------------------------------------------|
| TRIM49       | 0,023104814 | 1,32390769 | tripartite motif containing 49                                                           |
| UBTFL1       | 0,043912478 | 1,32311609 | upstream binding transcription factor, RNA polymerase I-like 1                           |
| PDCD5        | 0,007825866 | 1,32275029 | programmed cell death 5                                                                  |
| HEXDC        | 0,002103952 | 1,3226796  | hexosaminidase (glycosyl hydrolase family 20, catalytic domain) containing               |
| OXCT1        | 0,011888616 | 1,32214786 | 3-oxoacid CoA transferase 1                                                              |
| KATNAL1      | 0,019026725 | 1,32157834 | katanin p60 subunit A-like 1                                                             |
| LOC100128988 | 0,017471506 | 1,31872921 | uncharacterized LOC100128988                                                             |
| MIR1295A     | 0,010084622 | 1,31843057 | microRNA 1295a                                                                           |
| RNU6-76P     | 0,034336522 | 1,31807904 | RNA, U6 small nuclear 76, pseudogene                                                     |
| C21orf91-OT1 | 0,034047669 | 1,31804959 | C21orf91 overlapping transcript 1                                                        |
| RPGRIP1      | 0,031354751 | 1,31790352 | retinitis pigmentosa GTPase regulator interacting protein 1                              |
| C14orf28     | 0,009288773 | 1,31690027 | chromosome 14 open reading frame 28                                                      |
| RUSC1        | 0,002348714 | 1,31619763 | RUN and SH3 domain containing 1                                                          |
| SLC25A2      | 0,004876591 | 1,31563187 | solute carrier family 25 (mitochondrial carrier; ornithine transporter) member 2         |
| SLC35B3      | 0,000240629 | 1,31529539 | solute carrier family 35 (adenosine 3'-phospho 5'-phosphosulfate transporter), member B3 |
| UBB          | 0,016154501 | 1,31432922 | ubiquitin B                                                                              |
| LCN10        | 0,006097507 | 1,31431496 | lipocalin 10                                                                             |
| C19orf54     | 0,016752829 | 1,31355315 | chromosome 19 open reading frame 54                                                      |
| LINC00607    | 0,030921136 | 1,31248497 | long intergenic non-protein coding RNA 607                                               |
| C20orf85     | 0,007591554 | 1,31205354 | chromosome 20 open reading frame 85                                                      |
| CHAF1B       | 0,000478723 | 1,31063724 | chromatin assembly factor 1, subunit B (p60)                                             |
| TCF7         | 0,002886223 | 1,31035715 | transcription factor 7 (T-cell specific, HMG-box)                                        |
| ORAI1        | 0,001321413 | 1,30976869 | ORAI calcium release-activated calcium modulator 1                                       |
| PRRT2        | 0,025165098 | 1,30975896 | proline-rich transmembrane protein 2                                                     |
| SLC14A2      | 0,000214028 | 1,30909061 | solute carrier family 14 (urea transporter), member 2                                    |
| SVIP         | 0,007984599 | 1,30889229 | small VCP/p97-interacting protein                                                        |
| DND1         | 0,002291722 | 1,30886431 | DND microRNA-mediated repression inhibitor 1                                             |
| DND1         | 0,002291722 | 1,30886431 | DND microRNA-mediated repression inhibitor 1                                             |
| VDR          | 0,011707214 | 1,30876577 | vitamin D (1,25- dihydroxyvitamin D3) receptor                                           |

|             |             |            |                                                                    |
|-------------|-------------|------------|--------------------------------------------------------------------|
| SLA2        | 0,039026675 | 1,30874877 | Src-like-adaptor 2                                                 |
| METTL3      | 0,002766495 | 1,3086095  | methyltransferase like 3                                           |
| LINC01133   | 0,010802345 | 1,30858583 | long intergenic non-protein coding RNA 1133                        |
| HCG27       | 0,011228806 | 1,30815236 | HLA complex group 27 (non-protein coding)                          |
| RAB9B       | 0,015459022 | 1,30811121 | RAB9B, member RAS oncogene family                                  |
| SLC7A11-AS1 | 0,02808087  | 1,30708568 | SLC7A11 antisense RNA 1                                            |
| LINC00605   | 0,000397355 | 1,30634243 | long intergenic non-protein coding RNA 605                         |
| KRTAP4-5    | 0,024699045 | 1,30621681 | keratin associated protein 4-5                                     |
| PSMB9       | 0,000970699 | 1,3061081  | proteasome (prosome, macropain) subunit, beta type, 9              |
| PSMB9       | 0,000970699 | 1,3061081  | proteasome (prosome, macropain) subunit, beta type, 9              |
| PSMB9       | 0,000970699 | 1,3061081  | proteasome (prosome, macropain) subunit, beta type, 9              |
| FAM163A     | 0,002479577 | 1,30594872 | family with sequence similarity 163, member A                      |
| KRTAP27-1   | 0,006785645 | 1,30518504 | keratin associated protein 27-1                                    |
| MTUS2-AS1   | 0,004660295 | 1,3048128  | MTUS2 antisense RNA 1                                              |
| LOC285740   | 0,003100162 | 1,30463468 | uncharacterized LOC285740                                          |
| CCDC115     | 0,028745079 | 1,30435386 | coiled-coil domain containing 115                                  |
| METTL6      | 0,038974863 | 1,30375592 | methyltransferase like 6                                           |
| TRIM35      | 0,005609546 | 1,30347307 | tripartite motif containing 35                                     |
| CDRT15      | 0,005867779 | 1,30344852 | CMT1A duplicated region transcript 15                              |
| ADM         | 0,004850017 | 1,30343521 | adrenomedullin                                                     |
| TMED1       | 0,002420481 | 1,30322357 | transmembrane emp24 protein transport domain containing 1          |
| SLCO3A1     | 0,001152535 | 1,30318418 | solute carrier organic anion transporter family, member 3A1        |
| NANOS1      | 0,004439153 | 1,30317821 | nanos homolog 1 (Drosophila)                                       |
| OTOL1       | 0,043359125 | 1,30308559 | otolin 1                                                           |
| POU3F4      | 0,001604928 | 1,30292297 | POU class 3 homeobox 4                                             |
| TRPA1       | 0,004939931 | 1,30261283 | transient receptor potential cation channel, subfamily A, member 1 |
| GFAP        | 0,003350966 | 1,30217121 | glial fibrillary acidic protein                                    |
| MIR4534     | 0,047311812 | 1,30205225 | microRNA 4534                                                      |
| TRIM46      | 0,000598968 | 1,3016715  | tripartite motif containing 46                                     |

|          |             |            |                                                              |
|----------|-------------|------------|--------------------------------------------------------------|
| B3GALT6  | 0,001121245 | 1,30166005 | UDP-Gal:betaGal beta 1,3-galactosyltransferase polypeptide 6 |
| RNASEH2A | 0,000540036 | 1,30020596 | ribonuclease H2, subunit A                                   |

**Supplemental Table 4: LPS down regulated genes in CD16+ MDDCs**

| <b>Symbol</b> | <b>adj. p</b> | <b>FC</b>    | <b>description</b>                                                                         |
|---------------|---------------|--------------|--------------------------------------------------------------------------------------------|
| LPL           | 1,45E-05      | -2,767835456 | lipoprotein lipase                                                                         |
| OCSTAMP       | 6,23E-06      | -2,589996962 | osteoclast stimulatory transmembrane protein                                               |
| SPP1          | 0,03095551    | -2,541131005 | secreted phosphoprotein 1                                                                  |
| ETV5          | 1,89E-05      | -2,304477335 | ets variant 5                                                                              |
| ROCK1P1       | 0,04485881    | -2,173537359 | Rho-associated, coiled-coil containing protein kinase 1 pseudogene 1                       |
| GPC4          | 0,00091243    | -2,149332855 | glypican 4                                                                                 |
| CLEC19A       | 0,00085757    | -2,127651351 | C-type lectin domain family 19, member A                                                   |
| MERTK         | 2,99E-05      | -2,09909593  | MER proto-oncogene, tyrosine kinase                                                        |
| USP17L15      | 0,00909561    | -2,003262907 | ubiquitin specific peptidase 17-like family member 15                                      |
| PTGFRN        | 0,01085785    | -1,947670803 | prostaglandin F2 receptor inhibitor                                                        |
| ERRFI1        | 0,00969738    | -1,900857411 | ERBB receptor feedback inhibitor 1                                                         |
| CHST15        | 0,001047      | -1,889141366 | carbohydrate (N-acetylgalactosamine 4-sulfate 6-O) sulfotransferase 15                     |
| PHLDA1        | 0,00024822    | -1,88760527  | pleckstrin homology-like domain, family A, member 1                                        |
| ZNF93         | 0,00035721    | -1,839240326 | zinc finger protein 93                                                                     |
| MYO1E         | 1,83E-06      | -1,82935744  | myosin IE                                                                                  |
| MIR54813      | 0,00643356    | -1,827073321 | microRNA 548i-3                                                                            |
| ACPP          | 0,00616781    | -1,805166416 | acid phosphatase, prostate                                                                 |
| PITPNC1       | 2,87E-05      | -1,789625705 | phosphatidylinositol transfer protein, cytoplasmic 1                                       |
| TNC           | 0,00998483    | -1,773834789 | tenascin C                                                                                 |
| DOCK3         | 0,00010218    | -1,773193428 | dedicator of cytokinesis 3                                                                 |
| KLHL6         | 7,16E-07      | -1,766955699 | kelch-like family member 6                                                                 |
| SORL1         | 0,0008654     | -1,756984151 | sortilin-related receptor, L(DLR class) A repeats containing                               |
| CD109         | 0,0078581     | -1,726730047 | CD109 molecule                                                                             |
| SLC7A7        | 0,00077657    | -1,724754487 | solute carrier family 7 (amino acid transporter light chain, $\gamma$ +L system), member 7 |
| KBTD8         | 0,00115357    | -1,718505267 | kelch repeat and BTB (POZ) domain containing 8                                             |
| CASS4         | 0,02783237    | -1,710842942 | Cas scaffolding protein family member 4                                                    |
| PDGFC         | 0,03393946    | -1,71076994  | platelet derived growth factor C                                                           |

|           |            |              |                                                                                          |
|-----------|------------|--------------|------------------------------------------------------------------------------------------|
| USP41     | 0,01172528 | -1,703178767 | ubiquitin specific peptidase 41                                                          |
| OR6C75    | 0,00858284 | -1,698684981 | olfactory receptor, family 6, subfamily C, member 75                                     |
| SLC4A7    | 0,00054004 | -1,685318218 | solute carrier family 4, sodium bicarbonate cotransporter, member 7                      |
| TLR3      | 0,04515105 | -1,670996061 | toll-like receptor 3                                                                     |
| ITGAE     | 2,41E-05   | -1,663857212 | integrin, alpha E (antigen CD103, human mucosal lymphocyte antigen 1; alpha polypeptide) |
| CA2       | 0,01680938 | -1,651272024 | carbonic anhydrase II                                                                    |
| MCOLN3    | 0,0003328  | -1,647066127 | mucoilin 3                                                                               |
| TMC8      | 1,98E-06   | -1,632243452 | transmembrane channel-like 8                                                             |
| DDIAS     | 0,00026019 | -1,629439188 | DNA damage-induced apoptosis suppressor                                                  |
| LOC286437 | 0,00074699 | -1,617238243 | uncharacterized LOC286437                                                                |
| TRPM2     | 0,00014847 | -1,615868901 | transient receptor potential cation channel, subfamily M, member 2                       |
| CAPNS2    | 0,00592599 | -1,612717079 | calpain, small subunit 2                                                                 |
| GNGT2     | 0,00047569 | -1,611779083 | guanine nucleotide binding protein (G protein), gamma transducing activity polypeptide 2 |
| MSR1      | 0,01074165 | -1,610011423 | macrophage scavenger receptor 1                                                          |
| CIART     | 0,00054115 | -1,60893289  | circadian associated repressor of transcription                                          |
| STRBP     | 5,62E-05   | -1,60296165  | spermatid perinuclear RNA binding protein                                                |
| LOC200772 | 3,69E-06   | -1,582275525 | uncharacterized LOC200772                                                                |
| MCTS2P    | 0,0288248  | -1,572756407 | malignant T cell amplified sequence 2, pseudogene                                        |
| GPBAR1    | 0,00043258 | -1,567043102 | G protein-coupled bile acid receptor 1                                                   |
| CABP4     | 2,28E-06   | -1,564294382 | calcium binding protein 4                                                                |
| ABCA1     | 0,00068874 | -1,559372546 | ATP-binding cassette, sub-family A (ABC1), member 1                                      |
| ITGAV     | 0,03318706 | -1,558348388 | integrin, alpha V                                                                        |
| CC2D2B    | 0,00777518 | -1,552823387 | coiled-coil and C2 domain containing 2B                                                  |
| MIR767    | 0,00085787 | -1,551370604 | microRNA 767                                                                             |
| NT5DC3    | 0,02564173 | -1,544419855 | 5'-nucleotidase domain containing 3                                                      |
| RFPL4AL1  | 0,01593782 | -1,542855399 | ret finger protein-like 4A-like 1                                                        |
| BEST1     | 8,88E-05   | -1,542374843 | bestrophin 1                                                                             |
| DTNB      | 0,0009947  | -1,53845844  | dystrobrevin, beta                                                                       |
| TMEM2     | 0,01766924 | -1,5382591   | transmembrane protein 2                                                                  |

|              |            |              |                                                                        |
|--------------|------------|--------------|------------------------------------------------------------------------|
| SAMD4A       | 0,00211276 | -1,534009515 | sterile alpha motif domain containing 4A                               |
| ZNF506       | 0,0064358  | -1,532600974 | zinc finger protein 506                                                |
| PDLIM7       | 7,31E-05   | -1,530595215 | PDZ and LIM domain 7 (enigma)                                          |
| LOC100289533 | 4,17E-05   | -1,528812729 | uncharacterized LOC100289533                                           |
| KLF10        | 0,01241298 | -1,524333691 | Kruppel-like factor 10                                                 |
| RPL13AP20    | 7,53E-05   | -1,518787654 | ribosomal protein L13a pseudogene 20                                   |
| CYYR1        | 0,03635987 | -1,515970499 | cysteine/tyrosine-rich 1                                               |
| TMEM14A      | 0,01700151 | -1,514465328 | transmembrane protein 14A                                              |
| HIST2H2AB    | 0,01257951 | -1,513294705 | histone cluster 2, H2ab                                                |
| LSM6         | 0,00185826 | -1,509069372 | LSM6 homolog, U6 small nuclear RNA associated ( <i>S. cerevisiae</i> ) |
| ZMAT3        | 0,00046352 | -1,501822135 | zinc finger, matrin-type 3                                             |
| MIR378E      | 0,01054676 | -1,499222371 | microRNA 378e                                                          |
| SIPA1L3      | 0,00078799 | -1,495177211 | signal-induced proliferation-associated 1 like 3                       |
| TMEM26       | 0,00303843 | -1,494919543 | transmembrane protein 26                                               |
| FCGR3A       | 0,02131883 | -1,491852254 | Fc fragment of IgG, low affinity IIIa, receptor (CD16a)                |
| ZNF573       | 0,00485774 | -1,491576442 | zinc finger protein 573                                                |
| GPR174       | 0,03696092 | -1,491536513 | G protein-coupled receptor 174                                         |
| MBP          | 0,00019967 | -1,488236815 | myelin basic protein                                                   |
| ABCC1        | 0,00112125 | -1,486476205 | ATP-binding cassette, sub-family C (CFTR/MRP), member 1                |
| APP          | 0,00624143 | -1,486164835 | amyloid beta (A4) precursor protein                                    |
| ZNF486       | 0,00654548 | -1,483094724 | zinc finger protein 486                                                |
| RPL23AP53    | 0,00240467 | -1,474397589 | ribosomal protein L23a pseudogene 53                                   |
| C10orf54     | 0,00305245 | -1,473892197 | chromosome 10 open reading frame 54                                    |
| PMEP1        | 0,01446822 | -1,471361271 | prostate transmembrane protein, androgen induced 1                     |
| MIR4727      | 0,02675053 | -1,471169142 | microRNA 4727                                                          |
| POLR2J       | 0,00321913 | -1,466780823 | polymerase (RNA) II (DNA directed) polypeptide J, 13.3kDa              |
| BCAT1        | 0,02112882 | -1,465779343 | branched chain amino-acid transaminase 1, cytosolic                    |
| EPS8         | 0,00432769 | -1,46432336  | epidermal growth factor receptor pathway substrate 8                   |
| LINC00965    | 0,01038609 | -1,463692782 | long intergenic non-protein coding RNA 965                             |



|              |            |              |                                                                       |
|--------------|------------|--------------|-----------------------------------------------------------------------|
| CATSPER1     | 0,00177752 | -1,463457721 | cation channel, sperm associated 1                                    |
| TMEM51       | 0,02809101 | -1,453360029 | transmembrane protein 51                                              |
| ETS1         | 0,02398809 | -1,453231844 | v-ets avian erythroblastosis virus E26 oncogene homolog 1             |
| MOSPD2       | 9,35E-05   | -1,437653439 | motile sperm domain containing 2                                      |
| RPS18        | 0,00242988 | -1,436886276 | ribosomal protein S18                                                 |
| ZNF563       | 0,0378406  | -1,43532342  | zinc finger protein 563                                               |
| CCDC102B     | 0,01578904 | -1,434745931 | coiled-coil domain containing 102B                                    |
| FMNL2        | 0,00076394 | -1,433413614 | formin-like 2                                                         |
| STIP1        | 2,41E-06   | -1,426678087 | stress-induced phosphoprotein 1                                       |
| DEPTOR       | 0,01941812 | -1,423095889 | DEP domain containing MTOR-interacting protein                        |
| LPP-AS2      | 0,01203021 | -1,420107746 | LPP antisense RNA 2                                                   |
| C20orf27     | 0,00081695 | -1,419306135 | chromosome 20 open reading frame 27                                   |
| PPM1H        | 0,00044484 | -1,419017954 | protein phosphatase, Mg <sup>2+</sup> /Mn <sup>2+</sup> dependent, 1H |
| TGFB2        | 0,00768879 | -1,4187548   | transforming growth factor, beta 2                                    |
| EIF1B        | 0,0051165  | -1,417848776 | eukaryotic translation initiation factor 1B                           |
| ZNF554       | 0,03620556 | -1,416067229 | zinc finger protein 554                                               |
| TTC3P1       | 0,00263791 | -1,414525558 | tetratricopeptide repeat domain 3 pseudogene 1                        |
| RPS6KA2      | 0,00017091 | -1,413966335 | ribosomal protein S6 kinase, 90kDa, polypeptide 2                     |
| C11orf24     | 0,00573984 | -1,412918295 | chromosome 11 open reading frame 24                                   |
| LOC100128668 | 0,0023815  | -1,410917733 | uncharacterized LOC100128668                                          |
| FLJ43681     | 0,0086524  | -1,41013873  | ribosomal protein L23a pseudogene                                     |
| RAB40B       | 0,00458733 | -1,409409354 | RAB40B, member RAS oncogene family                                    |
| LOC115110    | 7,44E-05   | -1,406740333 | uncharacterized LOC115110                                             |
| DNMT3A       | 0,00161184 | -1,406347556 | DNA (cytosine-5-)-methyltransferase 3 alpha                           |
| ZNF630       | 0,0288199  | -1,406129781 | zinc finger protein 630                                               |
| SNORD116-15  | 0,03638432 | -1,40342283  | small nucleolar RNA, C/D box 116-15                                   |
| PRR34        | 0,00013951 | -1,402597457 | proline rich 34                                                       |
| HIST1H1C     | 0,00771831 | -1,401399629 | histone cluster 1, H1c                                                |
| ZNF714       | 0,04123948 | -1,400777069 | zinc finger protein 714                                               |

|              |            |              |                                                                           |
|--------------|------------|--------------|---------------------------------------------------------------------------|
| HEBP1        | 0,03454867 | -1,400247992 | heme binding protein 1                                                    |
| GOLM1        | 0,03261581 | -1,399902144 | golgi membrane protein 1                                                  |
| SLC28A3      | 0,00027346 | -1,399095708 | solute carrier family 28 (concentrative nucleoside transporter), member 3 |
| ZRSR2        | 0,01110222 | -1,398382568 | zinc finger (CCCH type), RNA-binding motif and serine/arginine rich 2     |
| LOC151475    | 0,02239145 | -1,397677071 | uncharacterized LOC151475                                                 |
| UBAC2        | 0,00060294 | -1,397438285 | UBA domain containing 2                                                   |
| POLA1        | 0,00236315 | -1,391149023 | polymerase (DNA directed), alpha 1, catalytic subunit                     |
| IGF2BP2      | 0,02436553 | -1,387772643 | insulin-like growth factor 2 mRNA binding protein 2                       |
| LOC100132352 | 0,01969596 | -1,385635903 | FSHD region gene 1 pseudogene                                             |
| RASAL2       | 0,00426038 | -1,383971719 | RAS protein activator like 2                                              |
| LOC100128508 | 0,01344749 | -1,383728703 | PP12100                                                                   |
| RASSF1       | 0,00378103 | -1,381014636 | Ras association (RalGDS/AF-6) domain family member 1                      |
| LINC01422    | 0,01353779 | -1,380835836 | long intergenic non-protein coding RNA 1422                               |
| PLCXD1       | 4,42E-05   | -1,378882889 | phosphatidylinositol-specific phospholipase C, X domain containing 1      |
| LGALS1       | 0,0171219  | -1,377399382 | lectin, galactoside-binding-like                                          |
| ZNF329       | 0,00048835 | -1,377347153 | zinc finger protein 329                                                   |
| MCM6         | 0,00104519 | -1,375834802 | minichromosome maintenance complex component 6                            |
| MEF2D        | 3,02E-05   | -1,374959944 | myocyte enhancer factor 2D                                                |
| PSG5         | 0,0462449  | -1,373082339 | pregnancy specific beta-1-glycoprotein 5                                  |
| CD81         | 3,12E-05   | -1,373079554 | CD81 molecule                                                             |
| FKBP7        | 0,00111184 | -1,373066382 | FK506 binding protein 7                                                   |
| LINC00977    | 0,00824352 | -1,372922145 | long intergenic non-protein coding RNA 977                                |
| PGBD5        | 0,00307163 | -1,37249649  | piggyBac transposable element derived 5                                   |
| CAMKK1       | 0,00120633 | -1,372258221 | calcium/calmodulin-dependent protein kinase kinase 1, alpha               |
| RNF122       | 0,00013911 | -1,371486106 | ring finger protein 122                                                   |
| METTL7B      | 0,04378063 | -1,370175082 | methyltransferase like 7B                                                 |
| CD28         | 0,0038606  | -1,365171351 | CD28 molecule                                                             |
| MIR548J      | 0,04888486 | -1,362195555 | microRNA 548j                                                             |
| C10orf131    | 0,02128807 | -1,361643004 | chromosome 10 open reading frame 131                                      |

|              |            |              |                                                        |
|--------------|------------|--------------|--------------------------------------------------------|
| LOC100505909 | 0,00339507 | -1,361634687 | uncharacterized LOC100505909                           |
| ZNF100       | 0,00830115 | -1,360626918 | zinc finger protein 100                                |
| OR10J1       | 0,00249264 | -1,360158162 | olfactory receptor, family 10, subfamily J, member 1   |
| FERMT1       | 0,01263924 | -1,359807928 | fermitin family member 1                               |
| AP4B1-AS1    | 0,00068333 | -1,359724489 | AP4B1 antisense RNA 1                                  |
| GPRC5D       | 0,03970039 | -1,359361543 | G protein-coupled receptor, class C, group 5, member D |
| RPL22L1      | 0,00760461 | -1,359054019 | ribosomal protein L22-like 1                           |
| ZMYND11      | 0,0031097  | -1,357443834 | zinc finger, MYND-type containing 11                   |
| TULP4        | 0,01633409 | -1,356576944 | tubby like protein 4                                   |
| CPB2         | 0,00982924 | -1,356481751 | carboxypeptidase B2 (plasma)                           |
| SLC35G6      | 0,04003482 | -1,355437873 | solute carrier family 35, member G6                    |
| MEP1A        | 0,01824132 | -1,355247772 | mepirin A, alpha (PABA peptide hydrolase)              |
| EXOC5        | 0,03780551 | -1,354600455 | exocyst complex component 5                            |
| LOC283440    | 0,0044623  | -1,354477928 | uncharacterized LOC283440                              |
| MAP1LC3C     | 0,01127859 | -1,354420087 | microtubule-associated protein 1 light chain 3 gamma   |
| TSPAN4       | 0,00092616 | -1,353699233 | tetraspanin 4                                          |
| DUXA         | 0,00184294 | -1,353565153 | double homeobox A                                      |
| MIR181B1     | 0,04930392 | -1,352451053 | microRNA 181b-1                                        |
| ZNF697       | 0,00032597 | -1,351048858 | zinc finger protein 697                                |
| ABHD12       | 0,00166172 | -1,347679169 | abhydrolase domain containing 12                       |
| XPNPEP3      | 0,00185256 | -1,347571653 | X-prolyl aminopeptidase (aminopeptidase P) 3, putative |
| SNORD66      | 0,00666451 | -1,346771503 | small nucleolar RNA, C/D box 66                        |
| RNF128       | 0,0114907  | -1,346559681 | ring finger protein 128, E3 ubiquitin protein ligase   |
| FLNA         | 0,00152707 | -1,344468361 | filamin A, alpha                                       |
| PLD4         | 0,01339988 | -1,343660235 | phospholipase D family, member 4                       |
| CALCR        | 0,0068943  | -1,341941617 | calcitonin receptor                                    |
| NMD3         | 0,00563024 | -1,341767396 | NMD3 ribosome export adaptor                           |
| ELF5         | 0,00080689 | -1,3415979   | E74-like factor 5 (ets domain transcription factor)    |
| ZNF112       | 0,02563608 | -1,340069657 | zinc finger protein 112                                |

|              |            |              |                                                                    |
|--------------|------------|--------------|--------------------------------------------------------------------|
| GAS6         | 0,00134589 | -1,339358488 | growth arrest-specific 6                                           |
| SORBS1       | 0,01340506 | -1,339207738 | sorbin and SH3 domain containing 1                                 |
| C19orf10     | 0,00041505 | -1,338863543 | chromosome 19 open reading frame 10                                |
| HCG8         | 0,0462445  | -1,338584813 | HLA complex group 8                                                |
| TPTEP1       | 0,03562986 | -1,335602498 | transmembrane phosphatase with tensin homology pseudogene 1        |
| LOC400541    | 0,0357821  | -1,334685096 | uncharacterized LOC400541                                          |
| ZNF274       | 0,00022858 | -1,334329973 | zinc finger protein 274                                            |
| LRRC3C       | 0,04349534 | -1,333973274 | leucine rich repeat containing 3C                                  |
| TMEM130      | 0,00678185 | -1,333570174 | transmembrane protein 130                                          |
| PICALM       | 0,00037943 | -1,332819122 | phosphatidylinositol binding clathrin assembly protein             |
| LOC101927924 | 0,00014644 | -1,332772041 | uncharacterized LOC101927924                                       |
| LONRF3       | 0,00356496 | -1,332120969 | LON peptidase N-terminal domain and ring finger 3                  |
| RPL39        | 0,00341134 | -1,331457406 | ribosomal protein L39                                              |
| LOC641746    | 0,03747659 | -1,331260748 | glycine cleavage system protein H (aminomethyl carrier) pseudogene |
| BZW2         | 0,02523498 | -1,331232804 | basic leucine zipper and W2 domains 2                              |
| USP13        | 0,01053687 | -1,329461897 | ubiquitin specific peptidase 13 (isopeptidase T-3)                 |
| ZNF551       | 0,01817184 | -1,329188449 | zinc finger protein 551                                            |
| FAM138C      | 0,01594365 | -1,328263023 | family with sequence similarity 138, member C                      |
| MTMR12       | 0,00166582 | -1,32682117  | myotubularin related protein 12                                    |
| ALG10        | 0,01068316 | -1,326211804 | ALG10, alpha-1,2-glucosyltransferase                               |
| TXNRD1       | 0,03299491 | -1,325874472 | thioredoxin reductase 1                                            |
| HOOK3        | 0,00171357 | -1,325187718 | hook microtubule-tethering protein 3                               |
| NBR2         | 0,00101717 | -1,323845166 | neighbor of BRCA1 gene 2 (non-protein coding)                      |
| LDOC1L       | 0,00319076 | -1,323777071 | leucine zipper, down-regulated in cancer 1-like                    |
| SUN2         | 0,04761981 | -1,322769191 | Sad1 and UNC84 domain containing 2                                 |
| MAPKAPK5     | 0,0005277  | -1,321248357 | mitogen-activated protein kinase-activated protein kinase 5        |
| PLEKHA6      | 0,00720102 | -1,320395827 | pleckstrin homology domain containing, family A member 6           |
| LRIG1        | 0,00752621 | -1,320199183 | leucine-rich repeats and immunoglobulin-like domains 1             |
| PIAS2        | 0,02730918 | -1,316146378 | protein inhibitor of activated STAT, 2                             |

|              |            |              |                                                                      |
|--------------|------------|--------------|----------------------------------------------------------------------|
| AGO2         | 0,00794925 | -1,315537084 | argonaute RISC catalytic component 2                                 |
| STK39        | 0,00537462 | -1,314907934 | serine threonine kinase 39                                           |
| HDAC9        | 0,00323155 | -1,314334705 | histone deacetylase 9                                                |
| ATR          | 0,00833876 | -1,313374595 | ATR serine/threonine kinase                                          |
| MIG7         | 0,04731482 | -1,313212354 | mig-7                                                                |
| ADAM1A       | 0,03478149 | -1,312780711 | ADAM metallopeptidase domain 1A, pseudogene                          |
| MIEF1        | 0,0035842  | -1,310305086 | mitochondrial elongation factor 1                                    |
| RPL22        | 0,00096707 | -1,307874834 | ribosomal protein L22                                                |
| CCDC28A      | 0,00040235 | -1,307743974 | coiled-coil domain containing 28A                                    |
| RPTOR        | 0,00024114 | -1,307634484 | regulatory associated protein of MTOR, complex 1                     |
| HECA         | 0,00427652 | -1,307162743 | headcase homolog (Drosophila)                                        |
| CBX3         | 0,01233404 | -1,307154722 | chromobox homolog 3                                                  |
| LOC729987    | 0,02242553 | -1,305303565 | uncharacterized LOC729987                                            |
| C1orf180     | 0,01935646 | -1,304697746 | chromosome 1 open reading frame 180                                  |
| IL1RL2       | 0,03583293 | -1,304657408 | interleukin 1 receptor-like 2                                        |
| LOC100507316 | 0,01761792 | -1,302911727 | uncharacterized LOC100507316                                         |
| ZNF677       | 0,01139516 | -1,302631674 | zinc finger protein 677                                              |
| LINC00470    | 0,00433167 | -1,302597005 | long intergenic non-protein coding RNA 470                           |
| ESF1         | 0,02052807 | -1,301846584 | ESF1, nucleolar pre-rRNA processing protein, homolog (S. cerevisiae) |
| GCSHP3       | 0,01642234 | -1,300148285 | glycine cleavage system protein H (aminomethyl carrier) pseudogene 3 |

**Supplemental Table 5: LPS up regulated genes in CD16- MDDCs**

| Symbol     | adj. p     | FC         | description                                                            |
|------------|------------|------------|------------------------------------------------------------------------|
| MMP10      | 0,00010874 | 9,84407272 | matrix metalloproteinase 10 (stromelysin 2)                            |
| MMP1       | 0,00121759 | 6,53092248 | matrix metalloproteinase 1 (interstitial collagenase)                  |
| TGM2       | 0,00050368 | 3,6065825  | transglutaminase 2                                                     |
| NCCRP1     | 5,67E-05   | 3,45171634 | non-specific cytotoxic cell receptor protein 1 homolog (zebrafish)     |
| TNFRSF11A  | 0,00020385 | 2,7021087  | tumor necrosis factor receptor superfamily, member 11a, NFkB activator |
| IL1A       | 0,03703324 | 2,44590278 | interleukin 1, alpha                                                   |
| DCLK2      | 0,00037846 | 2,36559735 | doublecortin-like kinase 2                                             |
| TMEM176B   | 0,03647502 | 2,31916068 | transmembrane protein 176B                                             |
| LAMC2      | 0,00181119 | 2,20642343 | laminin, gamma 2                                                       |
| FAM13A     | 4,55E-06   | 2,15766995 | family with sequence similarity 13, member A                           |
| ROBO1      | 0,02104274 | 2,08560438 | roundabout, axon guidance receptor, homolog 1 (Drosophila)             |
| ZNF608     | 5,36E-07   | 2,07076125 | zinc finger protein 608                                                |
| TBC1D9     | 3,54E-06   | 1,99345149 | TBC1 domain family, member 9 (with GRAM domain)                        |
| HSD52      | 4,03E-05   | 1,96331694 | uncharacterized LOC729467                                              |
| LAMP1      | 0,00508357 | 1,94399198 | lysosomal-associated membrane protein 1                                |
| GBP6       | 0,00628319 | 1,94096415 | guanylate binding protein family, member 6                             |
| MMP8       | 0,01799375 | 1,91456843 | matrix metalloproteinase 8 (neutrophil collagenase)                    |
| CSRP2      | 1,25E-05   | 1,8870485  | cysteine and glycine-rich protein 2                                    |
| DSC2       | 0,00019583 | 1,87071869 | desmocollin 2                                                          |
| DLGAP1-AS2 | 0,00023045 | 1,83974752 | DLGAP1 antisense RNA 2                                                 |
| CHD7       | 7,45E-07   | 1,82730927 | chromodomain helicase DNA binding protein 7                            |
| RGS2       | 0,00133739 | 1,81602648 | regulator of G-protein signaling 2                                     |
| SULT1C4    | 0,00123928 | 1,81321328 | sulfotransferase family, cytosolic, 1C, member 4                       |
| FBN1       | 1,00E-10   | 1,81276053 | fibrillin 1                                                            |
| SLC16A9    | 0,01563733 | 1,80138643 | solute carrier family 16, member 9                                     |
| ALDH1L2    | 0,00041277 | 1,79277009 | aldehyde dehydrogenase 1 family, member L2                             |
| CEP70      | 9,61E-05   | 1,79005838 | centrosomal protein 70kDa                                              |

|              |            |            |                                                                  |
|--------------|------------|------------|------------------------------------------------------------------|
| IL1RN        | 0,00553958 | 1,78359072 | interleukin 1 receptor antagonist                                |
| FOXD4        | 0,03462564 | 1,74482951 | forkhead box D4                                                  |
| TREM1        | 0,03212097 | 1,72862125 | triggering receptor expressed on myeloid cells 1                 |
| SNORA70C     | 0,00669115 | 1,72008043 | small nucleolar RNA, H/ACA box 70C                               |
| LUM          | 0,00056495 | 1,71889576 | lumican                                                          |
| TLE1         | 0,00218665 | 1,71686285 | transducin-like enhancer of split 1 (E(sp1) homolog, Drosophila) |
| URAD         | 2,52E-05   | 1,70391898 | ureidoimidazoline (2-oxo-4-hydroxy-4-carboxy-5-) decarboxylase   |
| IL31RA       | 0,00119256 | 1,70227019 | interleukin 31 receptor A                                        |
| SEL1L3       | 0,03400768 | 1,69089625 | sel-1 suppressor of lin-12-like 3 (C. elegans)                   |
| PTPRG        | 0,00261407 | 1,6894293  | protein tyrosine phosphatase, receptor type, G                   |
| YBX3P1       | 0,0005595  | 1,68715273 | Y box binding protein 3 pseudogene 1                             |
| AMOT         | 0,00553184 | 1,67132484 | angiominin                                                       |
| MALT1        | 0,00218712 | 1,66513949 | mucosa associated lymphoid tissue lymphoma translocation gene 1  |
| RNU6-55P     | 0,0065015  | 1,66329444 | RNA, U6 small nuclear 55, pseudogene                             |
| NBEAL2       | 3,01E-05   | 1,65731248 | neurobeachin-like 2                                              |
| TUBAL3       | 0,00056838 | 1,65468545 | tubulin, alpha-like 3                                            |
| ZFP69B       | 3,00E-07   | 1,65207388 | ZFP69 zinc finger protein B                                      |
| LYPD1        | 0,00081913 | 1,64928888 | LY6/PLAUR domain containing 1                                    |
| LOC100130476 | 0,00033461 | 1,643935   | uncharacterized LOC100130476                                     |
| RET          | 1,58E-05   | 1,64011425 | ret proto-oncogene                                               |
| BAALC        | 0,00051687 | 1,63865504 | brain and acute leukemia, cytoplasmic                            |
| ENPP6        | 0,00030621 | 1,6375102  | ectonucleotide pyrophosphatase/phosphodiesterase 6               |
| OSBPL3       | 0,00153562 | 1,63565664 | oxysterol binding protein-like 3                                 |
| ALCAM        | 0,01302005 | 1,63489501 | activated leukocyte cell adhesion molecule                       |
| BHLHA15      | 2,55E-05   | 1,63310778 | basic helix-loop-helix family, member a15                        |
| PTP4A3       | 0,00474589 | 1,6296168  | protein tyrosine phosphatase type IVA, member 3                  |
| PPARG        | 0,02326198 | 1,61789582 | peroxisome proliferator-activated receptor gamma                 |
| METTL1       | 0,00222099 | 1,60564404 | methyltransferase like 1                                         |
| RAPGEF5      | 0,00034274 | 1,60397062 | Rap guanine nucleotide exchange factor (GEF) 5                   |

|           |            |            |                                                            |
|-----------|------------|------------|------------------------------------------------------------|
| KLHL42    | 0,00221448 | 1,60335415 | kelch-like family member 42                                |
| LOC154761 | 0,0056715  | 1,59804231 | family with sequence similarity 115, member C pseudogene   |
| UBE2R2    | 2,55E-07   | 1,59580564 | ubiquitin-conjugating enzyme E2R 2                         |
| MIR139    | 6,67E-06   | 1,59031841 | microRNA 139                                               |
| GPR55     | 0,00047136 | 1,57999724 | G protein-coupled receptor 55                              |
| PROB1     | 0,0005829  | 1,56871517 | proline-rich basic protein 1                               |
| LANCL2    | 0,00014411 | 1,5665287  | LanC lantibiotic synthetase component C-like 2 (bacterial) |
| APOD      | 0,00257231 | 1,56335639 | apolipoprotein D                                           |
| HCG27     | 0,01322876 | 1,56225611 | HLA complex group 27 (non-protein coding)                  |
| ZXDA      | 5,63E-05   | 1,5583292  | zinc finger, X-linked, duplicated A                        |
| SMCO4     | 0,00123748 | 1,55131649 | single-pass membrane protein with coiled-coil domains 4    |
| RNF150    | 0,0371703  | 1,55113827 | ring finger protein 150                                    |
| STEAP1B   | 0,00141887 | 1,54927896 | STEAP family member 1B                                     |
| LDHAL6B   | 0,00075682 | 1,54810039 | lactate dehydrogenase A-like 6B                            |
| IL2RG     | 0,00100744 | 1,54245025 | interleukin 2 receptor, gamma                              |
| MIR3685   | 0,01553237 | 1,53328738 | microRNA 3685                                              |
| SFMBT2    | 0,0014358  | 1,5328886  | Scm-like with four mbt domains 2                           |
| MEX3C     | 0,00120115 | 1,52966529 | mex-3 RNA binding family member C                          |
| MXRA5     | 5,42E-05   | 1,52860501 | matrix-remodelling associated 5                            |
| DENND5B   | 0,00010815 | 1,52798282 | DENN/MADD domain containing 5B                             |
| PRKCA     | 0,01786917 | 1,52512252 | protein kinase C, alpha                                    |
| MIR1183   | 0,00932307 | 1,51660195 | microRNA 1183                                              |
| LINC00467 | 0,0044964  | 1,51415048 | long intergenic non-protein coding RNA 467                 |
| ENO3      | 0,0006588  | 1,51358243 | enolase 3 (beta, muscle)                                   |
| STX17-AS1 | 0,00052805 | 1,50973665 | STX17 antisense RNA 1                                      |
| PXDC1     | 0,00032209 | 1,50812138 | PX domain containing 1                                     |
| GEMIN8P4  | 0,00423541 | 1,50661887 | gem (nuclear organelle) associated protein 8 pseudogene 4  |
| RGS6      | 0,00037009 | 1,50482214 | regulator of G-protein signaling 6                         |
| ULK4P3    | 0,01574078 | 1,50387441 | ULK4 pseudogene 3                                          |



|           |            |            |                                                                |
|-----------|------------|------------|----------------------------------------------------------------|
| MIR196A2  | 0,00209078 | 1,50194427 | microRNA 196a-2                                                |
| NCAPG     | 0,01888124 | 1,49591556 | non-SMC condensin I complex, subunit G                         |
| MIR4529   | 0,00360645 | 1,4923092  | microRNA 4529                                                  |
| SGOL1     | 0,00982665 | 1,48777803 | shugoshin-like 1 (S. pombe)                                    |
| KRT6B     | 0,00942411 | 1,48515873 | keratin 6B                                                     |
| DAPL1     | 0,00888402 | 1,48494793 | death associated protein-like 1                                |
| HTR2B     | 0,00011349 | 1,48443539 | 5-hydroxytryptamine (serotonin) receptor 2B, G protein-coupled |
| ARHGAP22  | 0,03134851 | 1,48039582 | Rho GTPase activating protein 22                               |
| LINC00540 | 0,00103639 | 1,48014961 | long intergenic non-protein coding RNA 540                     |
| C6orf226  | 0,00117497 | 1,47610627 | chromosome 6 open reading frame 226                            |
| CXorf65   | 0,00254515 | 1,4732676  | chromosome X open reading frame 65                             |
| OR6P1     | 0,01352039 | 1,47318569 | olfactory receptor, family 6, subfamily P, member 1            |
| PACSN2    | 0,03136255 | 1,47107583 | protein kinase C and casein kinase substrate in neurons 2      |
| CXCL6     | 0,00930794 | 1,46769959 | chemokine (C-X-C motif) ligand 6                               |
| IL1R1     | 0,02477091 | 1,46731032 | interleukin 1 receptor, type I                                 |
| C6orf106  | 3,74E-06   | 1,46698461 | chromosome 6 open reading frame 106                            |
| DLL4      | 0,01437969 | 1,46557737 | delta-like 4 (Drosophila)                                      |
| ACOT4     | 0,00188839 | 1,46506219 | acyl-CoA thioesterase 4                                        |
| FCHSD2    | 0,00102854 | 1,46373356 | FCH and double SH3 domains 2                                   |
| USP27X    | 0,03486878 | 1,46196775 | ubiquitin specific peptidase 27, X-linked                      |
| PPP1R2    | 3,17E-05   | 1,46163676 | protein phosphatase 1, regulatory (inhibitor) subunit 2        |
| CAPN6     | 8,30E-05   | 1,46080386 | calpain 6                                                      |
| ENOX1     | 0,00119875 | 1,45984509 | ecto-NOX disulfide-thiol exchanger 1                           |
| LOC401312 | 0,02160285 | 1,45765615 | uncharacterized LOC401312                                      |
| PRB4      | 0,00471365 | 1,45723028 | proline-rich protein BstNI subfamily 4                         |
| RSPH10B   | 0,00010562 | 1,45680468 | radial spoke head 10 homolog B (Chlamydomonas)                 |
| HGF       | 0,0046325  | 1,45370753 | hepatocyte growth factor (hepatopoietin A; scatter factor)     |
| ZNF581    | 0,00063743 | 1,45286845 | zinc finger protein 581                                        |
| SPECC1    | 0,00051929 | 1,44710918 | sperm antigen with calponin homology and coiled-coil domains 1 |

|              |            |            |                                                                     |
|--------------|------------|------------|---------------------------------------------------------------------|
| SNORD11B     | 0,0318753  | 1,44469489 | small nucleolar RNA, C/D box 11B                                    |
| ATP11A       | 0,01015482 | 1,44405273 | ATPase, class VI, type 11A                                          |
| ABCD1        | 2,84E-05   | 1,44402406 | ATP-binding cassette, sub-family D (ALD), member 1                  |
| TAC3         | 0,00131159 | 1,4434761  | tachykinin 3                                                        |
| IFT57        | 0,00827512 | 1,44104695 | intraflagellar transport 57                                         |
| CCDC30       | 0,00847249 | 1,44078357 | coiled-coil domain containing 30                                    |
| TRIB1        | 0,01394086 | 1,44007418 | tribbles pseudokinase 1                                             |
| ROR1         | 0,01054616 | 1,43880754 | receptor tyrosine kinase-like orphan receptor 1                     |
| AP1S3        | 0,02730301 | 1,43566508 | adaptor-related protein complex 1, sigma 3 subunit                  |
| OVOL2        | 0,00081475 | 1,4353668  | ovo-like zinc finger 2                                              |
| IL6ST        | 0,00831284 | 1,43444991 | interleukin 6 signal transducer                                     |
| KRTAP19-8    | 0,01650805 | 1,43317239 | keratin associated protein 19-8                                     |
| IL23A        | 0,00425683 | 1,43269329 | interleukin 23, alpha subunit p19                                   |
| MIR4660      | 0,01544226 | 1,42795642 | microRNA 4660                                                       |
| ITPR1        | 0,03116663 | 1,42632538 | inositol 1,4,5-trisphosphate receptor, type 1                       |
| RAPH1        | 0,04005715 | 1,42392107 | Ras association (RalGDS/AF-6) and pleckstrin homology domains 1     |
| CELSR1       | 0,00500063 | 1,42327308 | cadherin, EGF LAG seven-pass G-type receptor 1                      |
| LOX          | 0,00266988 | 1,42296415 | lysyl oxidase                                                       |
| ACTA2        | 0,00130778 | 1,42295786 | actin, alpha 2, smooth muscle, aorta                                |
| LINC01359    | 0,00795274 | 1,42257521 | long intergenic non-protein coding RNA 1359                         |
| LINC01000    | 0,01031066 | 1,42181922 | long intergenic non-protein coding RNA 1000                         |
| ELMSAN1      | 0,00184753 | 1,42079212 | ELM2 and Myb/SANT-like domain containing 1                          |
| COCH         | 0,01842659 | 1,42047763 | cochlin                                                             |
| KRTAP9-8     | 0,00237863 | 1,41891868 | keratin associated protein 9-8                                      |
| LOC93432     | 0,03518739 | 1,41809172 | maltase-glucoamylase (alpha-glucosidase)                            |
| LOC100652931 | 0,00685452 | 1,41691712 | RNA binding motif protein, Y-linked, family 1, member A1 pseudogene |
| SNORD13P2    | 0,01306252 | 1,41604555 | small nucleolar RNA, C/D box 13 pseudogene 2                        |
| RAD51        | 0,00711707 | 1,41481313 | RAD51 recombinase                                                   |
| MKNK2        | 0,00081924 | 1,41440286 | MAP kinase interacting serine/threonine kinase 2                    |

|           |            |            |                                                                            |
|-----------|------------|------------|----------------------------------------------------------------------------|
| FLJ45248  | 0,00954192 | 1,41358928 | FLJ45248 protein                                                           |
| EGOT      | 0,00245647 | 1,41285667 | eosinophil granule ontogeny transcript (non-protein coding)                |
| CYP2J2    | 0,0026036  | 1,41274795 | cytochrome P450, family 2, subfamily J, polypeptide 2                      |
| TBC1D1    | 0,00219963 | 1,41142462 | TBC1 (tre-2/USP6, BUB2, cdc16) domain family, member 1                     |
| RPS27A    | 0,0024681  | 1,40790602 | ribosomal protein S27a                                                     |
| S100A3    | 0,01328032 | 1,40771728 | S100 calcium binding protein A3                                            |
| YME1L1    | 0,02456638 | 1,40492576 | YME1-like 1 ATPase                                                         |
| AES       | 0,01600998 | 1,40276491 | amino-terminal enhancer of split                                           |
| SNORA77   | 0,04166989 | 1,40241387 | small nucleolar RNA, H/ACA box 77                                          |
| RNF17     | 0,00059201 | 1,40158172 | ring finger protein 17                                                     |
| HTR1D     | 0,00112043 | 1,40076279 | 5-hydroxytryptamine (serotonin) receptor 1D, G protein-coupled             |
| ASH1L-AS1 | 0,00060153 | 1,39714523 | ASH1L antisense RNA 1                                                      |
| DRD4      | 0,01605167 | 1,39576584 | dopamine receptor D4                                                       |
| BAALCOS   | 0,01247766 | 1,39562286 | BAALC opposite strand                                                      |
| MGAT3     | 0,00011293 | 1,39252214 | mannosyl (beta-1,4-)-glycoprotein beta-1,4-N-acetylglucosaminyltransferase |
| LINC01391 | 0,00752353 | 1,39201298 | long intergenic non-protein coding RNA 1391                                |
| SLC36A4   | 0,00625696 | 1,3917917  | solute carrier family 36 (proton/amino acid symporter), member 4           |
| ENDOU     | 0,00880484 | 1,39157632 | endonuclease, polyU-specific                                               |
| TNKS1BP1  | 0,00040895 | 1,39108887 | tankyrase 1 binding protein 1, 182kDa                                      |
| STRN3     | 0,01786917 | 1,38928344 | striatin, calmodulin binding protein 3                                     |
| FAM117A   | 4,16E-06   | 1,38883488 | family with sequence similarity 117, member A                              |
| GABARAPL2 | 0,00447648 | 1,38867166 | GABA(A) receptor-associated protein-like 2                                 |
| NDC80     | 0,00179936 | 1,38854244 | NDC80 kinetochore complex component                                        |
| TGFA      | 0,0448859  | 1,3884865  | transforming growth factor, alpha                                          |
| MIR665    | 0,03660083 | 1,38845172 | microRNA 665                                                               |
| FANCI     | 0,02297811 | 1,386688   | Fanconi anemia, complementation group I                                    |
| OR6C4     | 0,02915088 | 1,38473674 | olfactory receptor, family 6, subfamily C, member 4                        |
| LOC643085 | 0,00031463 | 1,38457791 | uncharacterized LOC643085                                                  |
| STAG3L4   | 0,00233665 | 1,38396832 | stromal antigen 3-like 4 (pseudogene)                                      |

|            |            |            |                                                                                       |
|------------|------------|------------|---------------------------------------------------------------------------------------|
| ARRB2      | 2,78E-05   | 1,3827333  | arrestin, beta 2                                                                      |
| TOR4A      | 0,01855731 | 1,38152471 | torsin family 4, member A                                                             |
| MIR3189    | 0,02312562 | 1,38123283 | microRNA 3189                                                                         |
| LOC389607  | 0,01452049 | 1,376713   | uncharacterized LOC389607                                                             |
| ARHGEF3    | 0,02567796 | 1,37580606 | Rho guanine nucleotide exchange factor (GEF) 3                                        |
| CUTC       | 0,00297318 | 1,37569816 | cutC copper transporter                                                               |
| DEXI       | 0,0016965  | 1,37518346 | Dexi homolog (mouse)                                                                  |
| CLSTN1     | 0,00088831 | 1,37472969 | calsyntenin 1                                                                         |
| CST2       | 0,0203123  | 1,37046626 | cystatin SA                                                                           |
| MYOZ1      | 0,00848976 | 1,37043232 | myozenin 1                                                                            |
| LOC723805  | 0,0273346  | 1,37020169 | interleukin-like                                                                      |
| EDIL3      | 0,02298555 | 1,36916241 | EGF-like repeats and discoidin I-like domains 3                                       |
| ERVK13-1   | 0,03203536 | 1,3680835  | endogenous retrovirus group K13, member 1                                             |
| GTF2IRD2B  | 0,0435421  | 1,36670142 | GTF2I repeat domain containing 2B                                                     |
| TAL2       | 0,00633731 | 1,36570417 | T-cell acute lymphocytic leukemia 2                                                   |
| APOA1      | 0,00105014 | 1,36525984 | apolipoprotein A-I                                                                    |
| OAF        | 0,00172334 | 1,36506981 | OAF homolog (Drosophila)                                                              |
| FAHD2CP    | 0,04042811 | 1,36386175 | fumarylacetoacetate hydrolase domain containing 2C, pseudogene                        |
| TMEM72-AS1 | 0,01395915 | 1,36365019 | TMEM72 antisense RNA 1                                                                |
| CDCA4      | 0,00109383 | 1,361577   | cell division cycle associated 4                                                      |
| CHRNA10    | 0,01224152 | 1,36145245 | cholinergic receptor, nicotinic, alpha 10 (neuronal)                                  |
| FGFR1OP    | 0,00050546 | 1,36079769 | FGFR1 oncogene partner                                                                |
| LAMB1      | 0,04265295 | 1,35936966 | laminin, beta 1                                                                       |
| PTCD2      | 0,02509316 | 1,35860582 | pentatricopeptide repeat domain 2                                                     |
| CHIAP2     | 0,04695095 | 1,3576481  | chitinase, acidic pseudogene 2                                                        |
| ARL13B     | 0,01509087 | 1,35542273 | ADP-ribosylation factor-like 13B                                                      |
| MIRLET7A1  | 0,01689638 | 1,35437064 | microRNA let-7a-1                                                                     |
| PTGS2      | 0,02323166 | 1,3529559  | prostaglandin-endoperoxide synthase 2 (prostaglandin G/H synthase and cyclooxygenase) |
| FABP5      | 0,02478833 | 1,35157664 | fatty acid binding protein 5 (psoriasis-associated)                                   |

|              |            |            |                                                                       |
|--------------|------------|------------|-----------------------------------------------------------------------|
| SERPINB3     | 0,02009834 | 1,35148534 | serpin peptidase inhibitor, clade B (ovalbumin), member 3             |
| GFPT2        | 0,00098748 | 1,35115151 | glutamine-fructose-6-phosphate transaminase 2                         |
| TECTA        | 0,0046488  | 1,3510723  | tectorin alpha                                                        |
| FAM71B       | 0,00894823 | 1,34707329 | family with sequence similarity 71, member B                          |
| THAP9        | 0,02234681 | 1,3465939  | THAP domain containing 9                                              |
| ZNF600       | 0,03617649 | 1,34658659 | zinc finger protein 600                                               |
| SPTSSB       | 0,00032345 | 1,34651278 | serine palmitoyltransferase, small subunit B                          |
| CEACAM22P    | 0,00851193 | 1,3463478  | carcinoembryonic antigen-related cell adhesion molecule 2, pseudogene |
| ASMTL        | 0,02557718 | 1,34546095 | acetylserotonin O-methyltransferase-like                              |
| LOC100507564 | 0,00577303 | 1,34487766 | uncharacterized LOC100507564                                          |
| MYH7         | 0,01049147 | 1,34355082 | myosin, heavy chain 7, cardiac muscle, beta                           |
| OR3A3        | 0,02295028 | 1,34209189 | olfactory receptor, family 3, subfamily A, member 3                   |
| EHD1         | 0,01972088 | 1,34072972 | EH-domain containing 1                                                |
| FNIP2        | 0,02569521 | 1,33881817 | folliculin interacting protein 2                                      |
| TMTC2        | 0,00192777 | 1,33874333 | transmembrane and tetratricopeptide repeat containing 2               |
| DUSP16       | 0,02777451 | 1,33773927 | dual specificity phosphatase 16                                       |
| DEFB108B     | 0,03285613 | 1,33747565 | defensin, beta 108B                                                   |
| SLC35D1      | 0,00809797 | 1,33661353 | solute carrier family 35 (UDP-GlcA/UDP-GalNAc transporter), member D1 |
| LINC01482    | 0,01816117 | 1,33568994 | long intergenic non-protein coding RNA 1482                           |
| AXIN2        | 0,0074874  | 1,33565995 | axin 2                                                                |
| LINC01101    | 0,00890403 | 1,33505614 | long intergenic non-protein coding RNA 1101                           |
| FIZ1         | 0,00825088 | 1,33320874 | FLT3-interacting zinc finger 1                                        |
| POM121L10P   | 0,02022838 | 1,33315072 | POM121 transmembrane nucleoporin-like 10, pseudogene                  |
| SYNJ2        | 0,01935401 | 1,3316833  | synaptojanin 2                                                        |
| MIR500A      | 0,00121283 | 1,33110893 | microRNA 500a                                                         |
| LINC00173    | 0,02367898 | 1,33075497 | long intergenic non-protein coding RNA 173                            |
| MRGPRX1      | 0,02104274 | 1,32989957 | MAS-related GPR, member X1                                            |
| OR1L6        | 0,0463079  | 1,32932522 | olfactory receptor, family 1, subfamily L, member 6                   |
| SRP19        | 0,00352481 | 1,32903366 | signal recognition particle 19kDa                                     |

|            |            |            |                                                                                     |
|------------|------------|------------|-------------------------------------------------------------------------------------|
| GCKR       | 0,00160376 | 1,32865899 | glucokinase (hexokinase 4) regulator                                                |
| ZNF260     | 0,02206843 | 1,3286024  | zinc finger protein 260                                                             |
| DLGAP4-AS1 | 0,00306129 | 1,32856673 | DLGAP4 antisense RNA 1                                                              |
| CAMTA1     | 0,00019902 | 1,32747457 | calmodulin binding transcription activator 1                                        |
| NUDT15     | 0,02190818 | 1,32514332 | nudix (nucleoside diphosphate linked moiety X)-type motif 15                        |
| LOC440982  | 0,00557025 | 1,32444386 | uncharacterized LOC440982                                                           |
| PIGX       | 0,00587423 | 1,32405698 | phosphatidylinositol glycan anchor biosynthesis, class X                            |
| TARP       | 0,02005161 | 1,32105843 | TCR gamma alternate reading frame protein                                           |
| PALLD      | 0,00094364 | 1,31978867 | palladin, cytoskeletal associated protein                                           |
| FAM83G     | 0,02127246 | 1,31968213 | family with sequence similarity 83, member G                                        |
| RABGAP1    | 0,00050115 | 1,31935638 | RAB GTPase activating protein 1                                                     |
| CCDC90B    | 0,00755509 | 1,31791839 | coiled-coil domain containing 90B                                                   |
| RRM2       | 0,00739034 | 1,31656357 | ribonucleotide reductase M2                                                         |
| NRXN2      | 0,02782997 | 1,31639368 | neurexin 2                                                                          |
| OR1F2P     | 0,00779448 | 1,31617419 | olfactory receptor, family 1, subfamily F, member 2                                 |
| C2CD4A     | 0,01108996 | 1,31576446 | C2 calcium-dependent domain containing 4A                                           |
| RRN3P3     | 0,0059694  | 1,315292   | RNA polymerase I transcription factor homolog ( <i>S. cerevisiae</i> ) pseudogene 3 |
| THNSL2     | 0,00226623 | 1,3140497  | threonine synthase-like 2 ( <i>S. cerevisiae</i> )                                  |
| MIR4804    | 0,02782986 | 1,31211361 | microRNA 4804                                                                       |
| STK11      | 0,00194406 | 1,31209095 | serine/threonine kinase 11                                                          |
| ANGPTL4    | 0,00583191 | 1,31169177 | angiopoietin-like 4                                                                 |
| RAPGEF1    | 0,00347238 | 1,31063594 | Rap guanine nucleotide exchange factor (GEF) 1                                      |
| PSG10P     | 0,03251818 | 1,30971374 | pregnancy specific beta-1-glycoprotein 10, pseudogene                               |
| LOC728989  | 0,04094152 | 1,30934792 | phosphodiesterase 4D interacting protein pseudogene                                 |
| ANKRD20A9P | 0,03004043 | 1,30715513 | ankyrin repeat domain 20 family, member A9, pseudogene                              |
| FAM78B     | 0,01667191 | 1,30511785 | family with sequence similarity 78, member B                                        |
| TBC1D19    | 0,01712013 | 1,30471176 | TBC1 domain family, member 19                                                       |
| RASA1      | 0,02839614 | 1,30355847 | RAS p21 protein activator (GTPase activating protein) 1                             |
| CASC4      | 0,00151231 | 1,30335462 | cancer susceptibility candidate 4                                                   |

|          |            |            |                                                 |
|----------|------------|------------|-------------------------------------------------|
| ZBTB21   | 0,00109899 | 1,30319679 | zinc finger and BTB domain containing 21        |
| CEP89    | 0,00086334 | 1,30302137 | centrosomal protein 89kDa                       |
| C7orf66  | 0,02366215 | 1,30231678 | chromosome 7 open reading frame 66              |
| MIRLET7I | 0,02160285 | 1,30202918 | microRNA let-7i                                 |
| RGS20    | 0,02079368 | 1,30170476 | regulator of G-protein signaling 20             |
| AP4M1    | 0,00177067 | 1,30126013 | adaptor-related protein complex 4, mu 1 subunit |

**Supplemental Table 6: LPS down regulated genes in CD16- MDDCs**

| Symbol   | adj. p      | FC         | description                                                                    |
|----------|-------------|------------|--------------------------------------------------------------------------------|
| CD24     | 0,000499533 | -20,001668 | CD24 molecule                                                                  |
| STEAP4   | 1,75E-06    | -8,6502205 | STEAP family member 4                                                          |
| SLC40A1  | 1,60E-06    | -5,4747125 | solute carrier family 40 (iron-regulated transporter), member 1                |
| CD163L1  | 2,21E-06    | -5,379027  | CD163 molecule-like 1                                                          |
| RXFP1    | 1,60E-06    | -5,2782444 | relaxin/insulin-like family peptide receptor 1                                 |
| MIR146B  | 3,43E-06    | -5,068615  | microRNA 146b                                                                  |
| PAK7     | 6,72E-11    | -4,9638446 | p21 protein (Cdc42/Rac)-activated kinase 7                                     |
| CCL18    | 5,12E-05    | -4,4359942 | chemokine (C-C motif) ligand 18 (pulmonary and activation-regulated)           |
| GPR34    | 0,002101415 | -3,2156477 | G protein-coupled receptor 34                                                  |
| CADM3    | 0,000123844 | -3,178473  | cell adhesion molecule 3                                                       |
| IL17RB   | 2,36E-05    | -3,1411647 | interleukin 17 receptor B                                                      |
| CD207    | 0,03974339  | -3,1022789 | CD207 molecule, langerin                                                       |
| CD180    | 0,002048505 | -3,0789129 | CD180 molecule                                                                 |
| FOLR2    | 2,61E-05    | -3,0046642 | folate receptor 2 (fetal)                                                      |
| SH3PXD2B | 3,34E-06    | -2,9031087 | SH3 and PX domains 2B                                                          |
| COL14A1  | 1,54E-05    | -2,9022029 | collagen, type XIV, alpha 1                                                    |
| SNORD75  | 2,20E-06    | -2,7974126 | small nucleolar RNA, C/D box 75                                                |
| LGMN     | 0,001107383 | -2,7157909 | legumain                                                                       |
| SLC25A23 | 0,000364522 | -2,6188486 | solute carrier family 25 (mitochondrial carrier; phosphate carrier), member 23 |
| MS4A7    | 0,005428892 | -2,5804042 | membrane-spanning 4-domains, subfamily A, member 7                             |
| MIR3174  | 0,00063092  | -2,4401554 | microRNA 3174                                                                  |
| CRH      | 1,92E-07    | -2,4097644 | corticotropin releasing hormone                                                |
| CLEC4M   | 1,64E-05    | -2,3682708 | C-type lectin domain family 4, member M                                        |
| ME1      | 0,006232556 | -2,3560572 | malic enzyme 1, NADP(+)-dependent, cytosolic                                   |
| TSPAN15  | 8,08E-05    | -2,3304277 | tetraspanin 15                                                                 |
| SNORD104 | 0,017892754 | -2,3245559 | small nucleolar RNA, C/D box 104                                               |
| CACNA1D  | 0,001428839 | -2,3058106 | calcium channel, voltage-dependent, L type, alpha 1D subunit                   |



|           |             |            |                                                                                                   |
|-----------|-------------|------------|---------------------------------------------------------------------------------------------------|
| TIMP1     | 0,001177993 | -2,2935295 | TIMP metalloproteinase inhibitor 1                                                                |
| CD69      | 0,04220658  | -2,275088  | CD69 molecule                                                                                     |
| CD163     | 0,011676421 | -2,2310124 | CD163 molecule                                                                                    |
| SMARCA1   | 0,000179892 | -2,1800704 | SWI/SNF related, matrix associated, actin dependent regulator of chromatin, subfamily a, member 1 |
| IL10      | 0,003749465 | -2,1780732 | interleukin 10                                                                                    |
| ESAM      | 1,40E-07    | -2,1705069 | endothelial cell adhesion molecule                                                                |
| MIR4520-1 | 0,006763103 | -2,1425697 | microRNA 4520-1                                                                                   |
| NOV       | 1,63E-05    | -2,1013819 | nephroblastoma overexpressed                                                                      |
| HIST1H2AJ | 0,007629355 | -2,0730082 | histone cluster 1, H2aj                                                                           |
| TREML2    | 0,005753383 | -2,0454538 | triggering receptor expressed on myeloid cells-like 2                                             |
| ITGA9     | 0,030961006 | -1,9982146 | integrin, alpha 9                                                                                 |
| NCR3LG1   | 0,000208661 | -1,9827211 | natural killer cell cytotoxicity receptor 3 ligand 1                                              |
| SERPINI1  | 0,008100131 | -1,9818424 | serpin peptidase inhibitor, clade I (neuroserpin), member 1                                       |
| HSPA2     | 0,000597491 | -1,942542  | heat shock 70kDa protein 2                                                                        |
| HSD17B14  | 0,001339216 | -1,9394908 | hydroxysteroid (17-beta) dehydrogenase 14                                                         |
| MPO       | 0,034448903 | -1,9368248 | myeloperoxidase                                                                                   |
| RHPN1-AS1 | 3,38E-07    | -1,9340079 | RHPN1 antisense RNA 1 (head to head)                                                              |
| FAM95B1   | 4,07E-05    | -1,9212645 | family with sequence similarity 95, member B1                                                     |
| SNHG8     | 9,46E-05    | -1,916005  | small nucleolar RNA host gene 8 (non-protein coding)                                              |
| ATP13A2   | 0,000107102 | -1,910537  | ATPase type 13A2                                                                                  |
| LINC00967 | 4,34E-05    | -1,8992503 | long intergenic non-protein coding RNA 967                                                        |
| LAIR1     | 0,002790157 | -1,8978046 | leukocyte-associated immunoglobulin-like receptor 1                                               |
| SLC35F3   | 0,001753925 | -1,8952076 | solute carrier family 35, member F3                                                               |
| SEPP1     | 0,000225915 | -1,8902953 | selenoprotein P, plasma, 1                                                                        |
| ANTXR1    | 0,000452928 | -1,8700233 | anthrax toxin receptor 1                                                                          |
| EDDM3A    | 0,000148935 | -1,867113  | epididymal protein 3A                                                                             |
| MOCOS     | 0,002877427 | -1,8656038 | molybdenum cofactor sulfurase                                                                     |
| COLEC12   | 0,006844418 | -1,8653507 | collectin sub-family member 12                                                                    |
| ID1       | 0,000478973 | -1,8539048 | inhibitor of DNA binding 1, dominant negative helix-loop-helix protein                            |

|           |             |            |                                                                                    |
|-----------|-------------|------------|------------------------------------------------------------------------------------|
| GATSL2    | 0,000109505 | -1,8408549 | GATS protein-like 2                                                                |
| ADRB2     | 0,003802233 | -1,8407055 | adrenoceptor beta 2, surface                                                       |
| RNF138P1  | 0,000188216 | -1,8363838 | ring finger protein 138, E3 ubiquitin protein ligase pseudogene 1                  |
| ATP6V0D2  | 0,013742496 | -1,8348259 | ATPase, H <sup>+</sup> transporting, lysosomal 38kDa, V0 subunit d2                |
| HR        | 2,05E-07    | -1,8287868 | hair growth associated                                                             |
| SLC11A2   | 0,000294502 | -1,8234123 | solute carrier family 11 (proton-coupled divalent metal ion transporter), member 2 |
| RHO       | 0,000100989 | -1,8210092 | rhodopsin                                                                          |
| BCRP3     | 0,044028168 | -1,8106542 | breakpoint cluster region pseudogene 3                                             |
| MIR3143   | 0,001857726 | -1,7952666 | microRNA 3143                                                                      |
| ZFP14     | 0,005515905 | -1,7946576 | ZFP14 zinc finger protein                                                          |
| SLC16A10  | 0,000386458 | -1,7807195 | solute carrier family 16 (aromatic amino acid transporter), member 10              |
| LINC00264 | 0,0056115   | -1,7805193 | long intergenic non-protein coding RNA 264                                         |
| CD99P1    | 0,003101948 | -1,7701808 | CD99 molecule pseudogene 1                                                         |
| RASD1     | 0,00067543  | -1,761895  | RAS, dexamethasone-induced 1                                                       |
| MIR425    | 0,002063472 | -1,7586574 | microRNA 425                                                                       |
| CD34      | 0,008222423 | -1,7584199 | CD34 molecule                                                                      |
| SHROOM2   | 5,04E-06    | -1,7530949 | shroom family member 2                                                             |
| GPX3      | 1,37E-05    | -1,7425819 | glutathione peroxidase 3 (plasma)                                                  |
| CRYM-AS1  | 4,76E-05    | -1,7255143 | CRYM antisense RNA 1                                                               |
| DNASE2    | 0,028941828 | -1,7220985 | deoxyribonuclease II, lysosomal                                                    |
| TMEM37    | 0,00014734  | -1,7169021 | transmembrane protein 37                                                           |
| ESCO2     | 0,000463582 | -1,7137675 | establishment of sister chromatid cohesion N-acetyltransferase 2                   |
| ACKR1     | 0,001235875 | -1,7063119 | atypical chemokine receptor 1 (Duffy blood group)                                  |
| SNORA26   | 0,001260323 | -1,7021998 | small nucleolar RNA, H/ACA box 26                                                  |
| IQCK      | 0,000141109 | -1,7015971 | IQ motif containing K                                                              |
| HCAR1     | 0,00017281  | -1,7000946 | hydroxycarboxylic acid receptor 1                                                  |
| RCAN1     | 0,000268924 | -1,6852945 | regulator of calcineurin 1                                                         |
| IFT88     | 2,62E-05    | -1,6845418 | intraflagellar transport 88                                                        |
| SMAGP     | 0,000121436 | -1,6784331 | small cell adhesion glycoprotein                                                   |

|              |             |            |                                                                        |
|--------------|-------------|------------|------------------------------------------------------------------------|
| RRS1-AS1     | 0,000273802 | -1,677287  | RRS1 antisense RNA 1 (head to head)                                    |
| MIR938       | 0,000604885 | -1,6772719 | microRNA 938                                                           |
| HHLA2        | 0,029556541 | -1,6696313 | HERV-H LTR-associating 2                                               |
| LINC01150    | 8,65E-06    | -1,6628515 | long intergenic non-protein coding RNA 1150                            |
| LOC100288814 | 0,000116889 | -1,6622281 | uncharacterized LOC100288814                                           |
| NDUFA6-AS1   | 0,000286547 | -1,6533974 | NDUFA6 antisense RNA 1 (head to head)                                  |
| BMPR1A       | 0,028101578 | -1,6531444 | bone morphogenetic protein receptor, type IA                           |
| RTN4IP1      | 3,07E-06    | -1,6491016 | reticulon 4 interacting protein 1                                      |
| AKR7A3       | 0,000454975 | -1,643009  | aldo-keto reductase family 7, member A3 (aflatoxin aldehyde reductase) |
| CTSD         | 0,002812954 | -1,6428395 | cathepsin D                                                            |
| ZNF724P      | 0,025678991 | -1,6416131 | zinc finger protein 724, pseudogene                                    |
| LOC648987    | 0,00026769  | -1,6310908 | uncharacterized LOC648987                                              |
| PPFIBP2      | 6,66E-05    | -1,6306711 | PTPRF interacting protein, binding protein 2 (liprin beta 2)           |
| COLGALT2     | 0,000617804 | -1,6257704 | collagen beta(1-O)galactosyltransferase 2                              |
| NFE2         | 4,70E-05    | -1,6253116 | nuclear factor, erythroid 2                                            |
| HSPA4L       | 0,010513341 | -1,6247748 | heat shock 70kDa protein 4-like                                        |
| LOC389641    | 1,88E-06    | -1,6174877 | uncharacterized LOC389641                                              |
| MAGED2       | 0,008411199 | -1,613271  | melanoma antigen family D, 2                                           |
| B3GNTL1      | 0,000116605 | -1,6131269 | UDP-GlcNAc:betaGal beta-1,3-N-acetylglucosaminyltransferase-like 1     |
| ICA1         | 0,000231873 | -1,6116932 | islet cell autoantigen 1, 69kDa                                        |
| IBA57-AS1    | 5,91E-05    | -1,60445   | IBA57 antisense RNA 1 (head to head)                                   |
| FAM95B1      | 0,004920554 | -1,6030774 | family with sequence similarity 95, member B1                          |
| MAFA         | 1,44E-05    | -1,6003577 | v-maf avian musculoaponeurotic fibrosarcoma oncogene homolog A         |
| ZNF17        | 0,002692983 | -1,6002171 | zinc finger protein 17                                                 |
| DNAJC5B      | 0,002217369 | -1,5972639 | DnaJ (Hsp40) homolog, subfamily C, member 5 beta                       |
| ZNF567       | 0,000437961 | -1,5963279 | zinc finger protein 567                                                |
| ZNF763       | 0,021909973 | -1,5920757 | zinc finger protein 763                                                |
| PMFBP1       | 3,19E-05    | -1,5906457 | polyamine modulated factor 1 binding protein 1                         |
| TRIM15       | 0,000221752 | -1,5878638 | tripartite motif containing 15                                         |

|           |             |            |                                                                                 |
|-----------|-------------|------------|---------------------------------------------------------------------------------|
| TFAP2C    | 0,000709137 | -1,5873363 | transcription factor AP-2 gamma (activating enhancer binding protein 2 gamma)   |
| HS3ST2    | 0,011996668 | -1,5832958 | heparan sulfate (glucosamine) 3-O-sulfotransferase 2                            |
| MTMR9LP   | 1,33E-05    | -1,5797289 | myotubularin related protein 9-like, pseudogene                                 |
| GPR135    | 0,000295619 | -1,5752243 | G protein-coupled receptor 135                                                  |
| PKD1L3    | 8,06E-05    | -1,5711118 | polycystic kidney disease 1-like 3                                              |
| PLEKHG3   | 0,004280724 | -1,5645901 | pleckstrin homology domain containing, family G (with RhoGef domain) member 3   |
| RAB3IL1   | 0,000405219 | -1,5645282 | RAB3A interacting protein (rabin3)-like 1                                       |
| LINC01132 | 9,88E-05    | -1,563179  | long intergenic non-protein coding RNA 1132                                     |
| ARMCX3    | 3,27E-06    | -1,5627845 | armadillo repeat containing, X-linked 3                                         |
| CHDH      | 0,000148298 | -1,5559747 | choline dehydrogenase                                                           |
| TMEM150B  | 0,003484912 | -1,5527812 | transmembrane protein 150B                                                      |
| ROR2      | 0,002354816 | -1,5507566 | receptor tyrosine kinase-like orphan receptor 2                                 |
| PTENP1    | 0,02171795  | -1,5500667 | phosphatase and tensin homolog pseudogene 1 (functional)                        |
| B3GNT6    | 0,000559733 | -1,5499351 | UDP-GlcNAc:betaGal beta-1,3-N-acetylglucosaminyltransferase 6 (core 3 synthase) |
| CLDN4     | 0,000583168 | -1,5484976 | claudin 4                                                                       |
| SID2      | 0,001539311 | -1,5479397 | SID1 transmembrane family, member 2                                             |
| TNFRSF10A | 0,000309141 | -1,5444218 | tumor necrosis factor receptor superfamily, member 10a                          |
| TRAM1     | 0,030510727 | -1,5409062 | translocation associated membrane protein 1                                     |
| LTB       | 0,00172893  | -1,5358124 | lymphotoxin beta (TNF superfamily, member 3)                                    |
| PLEKHA8P1 | 2,47E-06    | -1,5349961 | pleckstrin homology domain containing, family A member 8 pseudogene 1           |
| WLS       | 0,00362655  | -1,5328912 | wntless Wnt ligand secretion mediator                                           |
| NDUFV2    | 0,00099165  | -1,5312554 | NADH dehydrogenase (ubiquinone) flavoprotein 2, 24kDa                           |
| MIR4671   | 0,000496438 | -1,5300675 | microRNA 4671                                                                   |
| TRIM15    | 0,000415028 | -1,5298216 | tripartite motif containing 15                                                  |
| TRIM15    | 0,000415028 | -1,5298216 | tripartite motif containing 15                                                  |
| TRIM15    | 0,000415028 | -1,5298216 | tripartite motif containing 15                                                  |
| RDH13     | 0,000872749 | -1,5298191 | retinol dehydrogenase 13 (all-trans/9-cis)                                      |
| FRAT1     | 8,38E-05    | -1,5296878 | frequently rearranged in advanced T-cell lymphomas 1                            |
| CACNA2D4  | 0,00030621  | -1,5276534 | calcium channel, voltage-dependent, alpha 2/delta subunit 4                     |

|             |             |            |                                                                  |
|-------------|-------------|------------|------------------------------------------------------------------|
| SNORD116-11 | 0,015127534 | -1,5272132 | small nucleolar RNA, C/D box 116-11                              |
| TRIM15      | 0,000555952 | -1,5233475 | tripartite motif containing 15                                   |
| TRIM15      | 0,000555952 | -1,5233475 | tripartite motif containing 15                                   |
| TRIM15      | 0,000555952 | -1,5233475 | tripartite motif containing 15                                   |
| TTC9        | 0,0172245   | -1,5222683 | tetratricopeptide repeat domain 9                                |
| C1orf115    | 0,00100919  | -1,5214047 | chromosome 1 open reading frame 115                              |
| FKTN        | 0,000829689 | -1,5195164 | fukutin                                                          |
| GSTM3       | 0,037404423 | -1,518168  | glutathione S-transferase mu 3 (brain)                           |
| TRIM15      | 0,000671306 | -1,517382  | tripartite motif containing 15                                   |
| TRIQQ       | 9,20E-06    | -1,5166249 | triple QxxK/R motif containing                                   |
| PEAK1       | 0,001264474 | -1,5163937 | pseudopodium-enriched atypical kinase 1                          |
| ZNF814      | 0,000263179 | -1,5157512 | zinc finger protein 814                                          |
| MRRF        | 0,005814283 | -1,5151306 | mitochondrial ribosome recycling factor                          |
| STOX2       | 0,000366418 | -1,5149426 | storkhead box 2                                                  |
| MIR4499     | 0,007930989 | -1,5146017 | microRNA 4499                                                    |
| MYO1B       | 0,010095522 | -1,5108576 | myosin IB                                                        |
| NTPCR       | 0,000362556 | -1,5108409 | nucleoside-triphosphatase, cancer-related                        |
| APCDD1      | 0,011900934 | -1,51045   | adenomatosis polyposis coli down-regulated 1                     |
| PUS7L       | 0,00036193  | -1,5086352 | pseudouridylate synthase 7 homolog ( <i>S. cerevisiae</i> )-like |
| CD99        | 0,002986311 | -1,5079482 | CD99 molecule                                                    |
| CTSS        | 9,26E-05    | -1,5070188 | cathepsin S                                                      |
| LPP         | 0,007003942 | -1,5059348 | LIM domain containing preferred translocation partner in lipoma  |
| LOC284023   | 1,05E-05    | -1,5036375 | uncharacterized LOC284023                                        |
| CES3        | 0,000693926 | -1,5019248 | carboxylesterase 3                                               |
| MOB3B       | 0,026926317 | -1,5014536 | MOB kinase activator 3B                                          |
| TRIM10      | 0,000194463 | -1,5003544 | tripartite motif containing 10                                   |
| GAB1        | 0,000736781 | -1,4991865 | GRB2-associated binding protein 1                                |
| C3orf33     | 7,37E-05    | -1,4975384 | chromosome 3 open reading frame 33                               |
| GRK4        | 0,002078272 | -1,4969547 | G protein-coupled receptor kinase 4                              |

|            |             |            |                                                                                       |
|------------|-------------|------------|---------------------------------------------------------------------------------------|
| C15orf65   | 0,001641063 | -1,4944593 | chromosome 15 open reading frame 65                                                   |
| SMPDL3A    | 0,030446028 | -1,4938267 | sphingomyelin phosphodiesterase, acid-like 3A                                         |
| ZNF774     | 0,000509808 | -1,4913138 | zinc finger protein 774                                                               |
| TAF1L      | 0,013555116 | -1,4906843 | TAF1 RNA polymerase II, TATA box binding protein (TBP)-associated factor, 210kDa-like |
| TJP2       | 0,02949097  | -1,4892559 | tight junction protein 2                                                              |
| MIR3198-1  | 0,001884935 | -1,488524  | microRNA 3198-1                                                                       |
| CST6       | 0,002477082 | -1,4877758 | cystatin E/M                                                                          |
| PAPSS2     | 0,007001729 | -1,4877048 | 3'-phosphoadenosine 5'-phosphosulfate synthase 2                                      |
| TPI1       | 0,000118396 | -1,4872695 | triosephosphate isomerase 1                                                           |
| DMXL2      | 0,027197238 | -1,4852174 | Dmx-like 2                                                                            |
| LOC339874  | 0,001840173 | -1,4846588 | uncharacterized LOC339874                                                             |
| TRAM2-AS1  | 0,004248964 | -1,4810875 | TRAM2 antisense RNA 1 (head to head)                                                  |
| ZNF790-AS1 | 0,001530823 | -1,4788879 | ZNF790 antisense RNA 1                                                                |
| ZNF493     | 0,031789466 | -1,4754588 | zinc finger protein 493                                                               |
| ZNF571     | 0,001052739 | -1,4739368 | zinc finger protein 571                                                               |
| SRGAP1     | 0,004897989 | -1,4720222 | SLIT-ROBO Rho GTPase activating protein 1                                             |
| IFI16      | 0,000366236 | -1,4701312 | interferon, gamma-inducible protein 16                                                |
| TRIM51EP   | 0,031100444 | -1,46964   | tripartite motif-containing 51E, pseudogene                                           |
| TMEM44     | 0,000170953 | -1,4693214 | transmembrane protein 44                                                              |
| LOC643339  | 0,000571161 | -1,4678041 | uncharacterized LOC643339                                                             |
| PRSS21     | 0,027710696 | -1,4658206 | protease, serine, 21 (testisin)                                                       |
| PTAR1      | 1,51E-05    | -1,4652626 | protein prenyltransferase alpha subunit repeat containing 1                           |
| GSTM2      | 0,015041291 | -1,4640603 | glutathione S-transferase mu 2 (muscle)                                               |
| RCN3       | 0,003048702 | -1,4630873 | reticulocalbin 3, EF-hand calcium binding domain                                      |
| PFKFB2     | 0,001201665 | -1,4623959 | 6-phosphofructo-2-kinase/fructose-2,6-biphosphatase 2                                 |
| GIMAP8     | 0,016886437 | -1,4622552 | GTPase, IMAP family member 8                                                          |
| ADD3       | 0,008795926 | -1,4607276 | adducin 3 (gamma)                                                                     |
| RRM2B      | 0,000194599 | -1,4606587 | ribonucleotide reductase M2 B (TP53 inducible)                                        |
| HAMP       | 0,024250068 | -1,4599418 | hepcidin antimicrobial peptide                                                        |

|            |             |            |                                                                    |
|------------|-------------|------------|--------------------------------------------------------------------|
| CYP1B1-AS1 | 0,001465045 | -1,4589009 | CYP1B1 antisense RNA 1                                             |
| GIMAP2     | 0,001342809 | -1,4579091 | GTPase, IMAP family member 2                                       |
| HKR1       | 2,16E-05    | -1,4579002 | HKR1, GLI-Kruppel zinc finger family member                        |
| PPIP5K1    | 0,015041291 | -1,4569024 | diphosphoinositol pentakisphosphate kinase 1                       |
| CHST13     | 0,000489157 | -1,4566426 | carbohydrate (chondroitin 4) sulfotransferase 13                   |
| LOC113230  | 0,005571695 | -1,4556958 | uncharacterized protein LOC113230                                  |
| DCAF13P3   | 0,011533051 | -1,4545063 | DDB1 and CUL4 associated factor 13 pseudogene 3                    |
| CD44       | 0,000575287 | -1,4511236 | CD44 molecule (Indian blood group)                                 |
| MAP7       | 0,007597033 | -1,4505506 | microtubule-associated protein 7                                   |
| PGM2L1     | 0,000562372 | -1,4498554 | phosphoglucomutase 2-like 1                                        |
| MSL3P1     | 0,014358136 | -1,4473552 | male-specific lethal 3 homolog (Drosophila) pseudogene 1           |
| POM121L8P  | 0,001130682 | -1,445684  | POM121 transmembrane nucleoporin-like 8 pseudogene                 |
| SEMA4A     | 0,016484092 | -1,4451056 | semaphorin 4A                                                      |
| OR2L1P     | 0,005749868 | -1,4449099 | olfactory receptor, family 2, subfamily L, member 1 pseudogene     |
| ITPKB      | 0,018114213 | -1,4429284 | inositol-trisphosphate 3-kinase B                                  |
| RMI1       | 0,004622491 | -1,4421338 | RecQ mediated genome instability 1                                 |
| MIR543     | 0,008227333 | -1,4380608 | microRNA 543                                                       |
| DIP2A-IT1  | 0,027274203 | -1,4365062 | DIP2A intronic transcript 1 (non-protein coding)                   |
| FAM13A-AS1 | 0,011244971 | -1,4358684 | FAM13A antisense RNA 1                                             |
| REXO2      | 0,000128416 | -1,4327103 | RNA exonuclease 2                                                  |
| LINC01114  | 0,029251052 | -1,4322814 | long intergenic non-protein coding RNA 1114                        |
| NBEAL1     | 0,002737261 | -1,4309839 | neurobeachin-like 1                                                |
| CWF19L1    | 0,00250501  | -1,4296623 | CWF19-like 1, cell cycle control (S. pombe)                        |
| LRRCC1     | 0,008741457 | -1,4288482 | leucine rich repeat and coiled-coil centrosomal protein 1          |
| FOSB       | 0,008169809 | -1,4281672 | FBJ murine osteosarcoma viral oncogene homolog B                   |
| GPR162     | 0,002636471 | -1,4256495 | G protein-coupled receptor 162                                     |
| ACO1       | 0,027849739 | -1,4252253 | aconitase 1, soluble                                               |
| GNB4       | 0,015260386 | -1,4250966 | guanine nucleotide binding protein (G protein), beta polypeptide 4 |
| GATAD1     | 0,000312825 | -1,4250777 | GATA zinc finger domain containing 1                               |

|           |             |            |                                                                                       |
|-----------|-------------|------------|---------------------------------------------------------------------------------------|
| ZNF823    | 0,004907445 | -1,4250128 | zinc finger protein 823                                                               |
| ZNF699    | 0,014307858 | -1,4239135 | zinc finger protein 699                                                               |
| PMS2      | 0,005438942 | -1,4223821 | PMS2 postmeiotic segregation increased 2 ( <i>S. cerevisiae</i> )                     |
| TTC30A    | 0,037354248 | -1,4222317 | tetratricopeptide repeat domain 30A                                                   |
| LINC01137 | 0,008072514 | -1,4219179 | long intergenic non-protein coding RNA 1137                                           |
| USPL1     | 0,002545148 | -1,4213205 | ubiquitin specific peptidase like 1                                                   |
| ZNF484    | 0,000153788 | -1,4210163 | zinc finger protein 484                                                               |
| ERO1LB    | 0,000412017 | -1,4197643 | ERO1-like beta ( <i>S. cerevisiae</i> )                                               |
| NOP16     | 0,000215659 | -1,4194031 | NOP16 nucleolar protein                                                               |
| RBM41     | 0,000419817 | -1,419083  | RNA binding motif protein 41                                                          |
| LOC731157 | 0,026933689 | -1,4168306 | uncharacterized LOC731157                                                             |
| ATP6V1B1  | 0,012882297 | -1,4140243 | ATPase, H <sup>+</sup> transporting, lysosomal 56/58kDa, V1 subunit B1                |
| PLCG1     | 0,000700287 | -1,4136578 | phospholipase C, gamma 1                                                              |
| COL24A1   | 0,000341179 | -1,4133049 | collagen, type XXIV, alpha 1                                                          |
| LIMD1-AS1 | 0,001020484 | -1,4121847 | LIMD1 antisense RNA 1                                                                 |
| SPAG5-AS1 | 0,001344877 | -1,4104449 | SPAG5 antisense RNA 1                                                                 |
| TCTN1     | 1,47E-05    | -1,4099007 | tectonic family member 1                                                              |
| FAM210B   | 0,00590983  | -1,4085436 | family with sequence similarity 210, member B                                         |
| RCBTB1    | 0,007091952 | -1,4076109 | regulator of chromosome condensation (RCC1) and BTB (POZ) domain containing protein 1 |
| DEPDC1B   | 0,025076335 | -1,4048836 | DEP domain containing 1B                                                              |
| ZMIZ1     | 0,001595712 | -1,4046333 | zinc finger, MIZ-type containing 1                                                    |
| GUSBP4    | 0,008930638 | -1,4044534 | glucuronidase, beta pseudogene 4                                                      |
| DCTPP1    | 0,000731143 | -1,4029193 | dCTP pyrophosphatase 1                                                                |
| FAM195A   | 0,007890011 | -1,4021874 | family with sequence similarity 195, member A                                         |
| NMT2      | 2,83E-05    | -1,4012554 | N-myristoyltransferase 2                                                              |
| ACSS1     | 0,000246014 | -1,3996559 | acyl-CoA synthetase short-chain family member 1                                       |
| HSPA6     | 0,010783394 | -1,3983845 | heat shock 70kDa protein 6 (HSP70B')                                                  |
| COA6      | 0,001461722 | -1,3981544 | cytochrome c oxidase assembly factor 6 homolog ( <i>S. cerevisiae</i> )               |
| MAGED1    | 8,89E-05    | -1,3981024 | melanoma antigen family D, 1                                                          |



|              |             |            |                                                                        |
|--------------|-------------|------------|------------------------------------------------------------------------|
| EPHB6        | 0,000239825 | -1,3975778 | EPH receptor B6                                                        |
| COPS4        | 7,68E-05    | -1,3968423 | COP9 signalosome subunit 4                                             |
| TRIM5        | 0,019701874 | -1,3967297 | tripartite motif containing 5                                          |
| LOC286058    | 0,000510816 | -1,3966374 | uncharacterized LOC286058                                              |
| CLIP4        | 0,009199265 | -1,3964564 | CAP-GLY domain containing linker protein family, member 4              |
| LOC100129940 | 0,017086302 | -1,3960118 | uncharacterized LOC100129940                                           |
| G6PC3        | 0,000533704 | -1,3958501 | glucose 6 phosphatase, catalytic, 3                                    |
| CYP4A11      | 0,013330556 | -1,3958163 | cytochrome P450, family 4, subfamily A, polypeptide 11                 |
| MTURN        | 0,004350172 | -1,3950918 | maturin, neural progenitor differentiation regulator homolog (Xenopus) |
| BMP1         | 0,002666463 | -1,3948265 | bone morphogenetic protein 1                                           |
| MAT2A        | 0,008543603 | -1,394354  | methionine adenosyltransferase II, alpha                               |
| KLHL25       | 0,000248875 | -1,3942661 | kelch-like family member 25                                            |
| LRP5L        | 0,001395625 | -1,392415  | low density lipoprotein receptor-related protein 5-like                |
| FAM160A1     | 0,002576123 | -1,3918841 | family with sequence similarity 160, member A1                         |
| EIF2B3       | 0,003552378 | -1,3916595 | eukaryotic translation initiation factor 2B, subunit 3 gamma, 58kDa    |
| SLC16A7      | 0,001600712 | -1,3916315 | solute carrier family 16 (monocarboxylate transporter), member 7       |
| C11orf54     | 7,68E-05    | -1,3906022 | chromosome 11 open reading frame 54                                    |
| ALG6         | 0,000454618 | -1,3897371 | ALG6, alpha-1,3-glucosyltransferase                                    |
| GPR146       | 0,026442512 | -1,387915  | G protein-coupled receptor 146                                         |
| MIR486-1     | 0,000146293 | -1,387846  | microRNA 486-1                                                         |
| C8orf37-AS1  | 7,19E-05    | -1,3878237 | C8orf37 antisense RNA 1                                                |
| KIAA1462     | 0,008033162 | -1,3875029 | KIAA1462                                                               |
| USP51        | 0,002304744 | -1,3872944 | ubiquitin specific peptidase 51                                        |
| BDKRB2       | 0,012532432 | -1,3853948 | bradykinin receptor B2                                                 |
| ZNF850       | 0,021356228 | -1,3850618 | zinc finger protein 850                                                |
| FLJ22447     | 0,004390116 | -1,3838559 | uncharacterized LOC400221                                              |
| FAM35A       | 0,000551568 | -1,3827439 | family with sequence similarity 35, member A                           |
| HIST1H2BO    | 0,02324354  | -1,3825361 | histone cluster 1, H2bo                                                |
| CLN3         | 0,001840487 | -1,3806518 | ceroid-lipofuscinosis, neuronal 3                                      |

|              |             |            |                                                              |
|--------------|-------------|------------|--------------------------------------------------------------|
| SELENBP1     | 0,010788641 | -1,3800147 | selenium binding protein 1                                   |
| LOC100129033 | 0,000919935 | -1,3789632 | QIQN5815                                                     |
| NEGR1        | 0,012730827 | -1,3787719 | neuronal growth regulator 1                                  |
| DUOX2        | 0,003807377 | -1,3782909 | dual oxidase 2                                               |
| LOC100507306 | 0,007899283 | -1,3777919 | uncharacterized LOC100507306                                 |
| GNS          | 0,002327632 | -1,3777885 | glucosamine (N-acetyl)-6-sulfatase                           |
| OSCAR        | 0,004820499 | -1,3776465 | osteoclast associated, immunoglobulin-like receptor          |
| MIR4720      | 0,044411823 | -1,3763442 | microRNA 4720                                                |
| ARRDC5       | 1,62E-05    | -1,3760884 | arrestin domain containing 5                                 |
| CMC1         | 0,019217283 | -1,3759334 | C-x(9)-C motif containing 1                                  |
| WDR35        | 0,001915369 | -1,3750625 | WD repeat domain 35                                          |
| TCEAL3       | 0,004473901 | -1,3747298 | transcription elongation factor A (SII)-like 3               |
| CETN2        | 0,000700287 | -1,3738461 | centrin, EF-hand protein, 2                                  |
| ITPKB-IT1    | 0,012106388 | -1,3735976 | ITPKB intronic transcript 1 (non-protein coding)             |
| SLC35C2      | 0,00051025  | -1,3730373 | solute carrier family 35 (GDP-fucose transporter), member C2 |
| GAS2L1       | 0,001011416 | -1,3705783 | growth arrest-specific 2 like 1                              |
| HCG11        | 0,02181167  | -1,370411  | HLA complex group 11 (non-protein coding)                    |
| LINC00630    | 0,002000047 | -1,3699071 | long intergenic non-protein coding RNA 630                   |
| LINC00294    | 0,018321511 | -1,3698779 | long intergenic non-protein coding RNA 294                   |
| PIK3IP1      | 0,022959076 | -1,368881  | phosphoinositide-3-kinase interacting protein 1              |
| ARHGEF15     | 0,000293167 | -1,3686806 | Rho guanine nucleotide exchange factor (GEF) 15              |
| USP6NL       | 0,030510727 | -1,3685442 | USP6 N-terminal like                                         |
| TRG-AS1      | 0,025805716 | -1,3673025 | T cell receptor gamma locus antisense RNA 1                  |
| LOC100131510 | 0,022716831 | -1,365628  | uncharacterized LOC100131510                                 |
| TRMT12       | 0,012209822 | -1,3649663 | tRNA methyltransferase 12 homolog (S. cerevisiae)            |
| PTPRJ        | 0,00347278  | -1,364882  | protein tyrosine phosphatase, receptor type, J               |
| MIR4440      | 0,003561277 | -1,3647104 | microRNA 4440                                                |
| LOC100506804 | 0,002257275 | -1,364249  | uncharacterized LOC100506804                                 |
| ZNF286A      | 0,005081192 | -1,364218  | zinc finger protein 286A                                     |

|           |             |            |                                                                                    |
|-----------|-------------|------------|------------------------------------------------------------------------------------|
| PHYHD1    | 7,40E-05    | -1,3630876 | phytanoyl-CoA dioxygenase domain containing 1                                      |
| VSIG10L   | 0,003818406 | -1,3630407 | V-set and immunoglobulin domain containing 10 like                                 |
| EDDM3B    | 0,01853872  | -1,3628867 | epididymal protein 3B                                                              |
| PEX11A    | 0,004012746 | -1,3602833 | peroxisomal biogenesis factor 11 alpha                                             |
| PACRGL    | 0,002585619 | -1,3600652 | PARK2 co-regulated-like                                                            |
| LINC01125 | 0,000644448 | -1,3598387 | long intergenic non-protein coding RNA 1125                                        |
| MYOM1     | 0,003733369 | -1,3591299 | myomesin 1                                                                         |
| SLC39A14  | 0,010670794 | -1,3586849 | solute carrier family 39 (zinc transporter), member 14                             |
| SH3YL1    | 0,000323352 | -1,3580948 | SH3 and SYLF domain containing 1                                                   |
| HDHD1     | 0,007039279 | -1,3579963 | haloacid dehalogenase-like hydrolase domain containing 1                           |
| HSD17B8   | 0,000165203 | -1,3575603 | hydroxysteroid (17-beta) dehydrogenase 8                                           |
| HSD17B8   | 0,000165203 | -1,3575603 | hydroxysteroid (17-beta) dehydrogenase 8                                           |
| HSD17B8   | 0,000165203 | -1,3575603 | hydroxysteroid (17-beta) dehydrogenase 8                                           |
| HSD17B8   | 0,000165203 | -1,3575603 | hydroxysteroid (17-beta) dehydrogenase 8                                           |
| HSD17B8   | 0,000165203 | -1,3575603 | hydroxysteroid (17-beta) dehydrogenase 8                                           |
| HSD17B8   | 0,000165203 | -1,3575603 | hydroxysteroid (17-beta) dehydrogenase 8                                           |
| LINC00032 | 0,009199726 | -1,3569656 | long intergenic non-protein coding RNA 32                                          |
| DUOXA2    | 0,014471117 | -1,3557451 | dual oxidase maturation factor 2                                                   |
| LOC553103 | 0,000253998 | -1,3554473 | uncharacterized LOC553103                                                          |
| TAS2R4    | 0,029790983 | -1,3551161 | taste receptor, type 2, member 4                                                   |
| PKIA      | 0,006591557 | -1,3550631 | protein kinase (cAMP-dependent, catalytic) inhibitor alpha                         |
| SLC17A7   | 0,000712759 | -1,3534706 | solute carrier family 17 (vesicular glutamate transporter), member 7               |
| DOLK      | 0,002060571 | -1,3531737 | dolichol kinase                                                                    |
| ACAP2     | 0,001868308 | -1,352932  | ArfGAP with coiled-coil, ankyrin repeat and PH domains 2                           |
| SLC11A1   | 0,03493697  | -1,3528685 | solute carrier family 11 (proton-coupled divalent metal ion transporter), member 1 |
| SLC25A30  | 0,022852452 | -1,3527998 | solute carrier family 25, member 30                                                |
| POLR3F    | 0,000790869 | -1,3524854 | polymerase (RNA) III (DNA directed) polypeptide F, 39 kDa                          |
| NDST2     | 0,001935974 | -1,3523293 | N-deacetylase/N-sulfotransferase (heparan glucosaminyl) 2                          |
| UBXN8     | 0,01616741  | -1,3521127 | UBX domain protein 8                                                               |

|              |             |            |                                                                  |
|--------------|-------------|------------|------------------------------------------------------------------|
| KBTBD11      | 0,003571968 | -1,351386  | kelch repeat and BTB (POZ) domain containing 11                  |
| C3orf79      | 0,004526856 | -1,3508558 | chromosome 3 open reading frame 79                               |
| MIR3118-4    | 0,011692439 | -1,3499107 | microRNA 3118-4                                                  |
| MIR3118-4    | 0,011692439 | -1,3499107 | microRNA 3118-4                                                  |
| DCAF17       | 0,000123673 | -1,3477949 | DDB1 and CUL4 associated factor 17                               |
| OSBPL10      | 0,002313495 | -1,3475067 | oxysterol binding protein-like 10                                |
| CYTH3        | 7,75E-05    | -1,3460582 | cytohesin 3                                                      |
| ADI1         | 0,00316008  | -1,3455353 | acireductone dioxygenase 1                                       |
| RABL3        | 0,001555548 | -1,3454712 | RAB, member of RAS oncogene family-like 3                        |
| LOC284513    | 0,001112    | -1,3450594 | uncharacterized LOC284513                                        |
| ADAL         | 0,026450724 | -1,3446248 | adenosine deaminase-like                                         |
| PRMT6        | 0,002350785 | -1,3445433 | protein arginine methyltransferase 6                             |
| HSPA12B      | 0,024053678 | -1,3443937 | heat shock 70kD protein 12B                                      |
| CAPN2        | 0,009711111 | -1,3443498 | calpain 2, (m/II) large subunit                                  |
| COL4A3BP     | 0,006874022 | -1,3430889 | collagen, type IV, alpha 3 (Goodpasture antigen) binding protein |
| LIPA         | 0,004520748 | -1,342897  | lipase A, lysosomal acid, cholesterol esterase                   |
| ZSCAN26      | 0,000181306 | -1,3427562 | zinc finger and SCAN domain containing 26                        |
| ZNF568       | 0,000268535 | -1,3427371 | zinc finger protein 568                                          |
| SOX8         | 0,046507243 | -1,3426507 | SRY (sex determining region Y)-box 8                             |
| SNX25        | 0,011340685 | -1,3426066 | sorting nexin 25                                                 |
| LOC100129473 | 0,011533051 | -1,3425911 | uncharacterized LOC100129473                                     |
| ZNF583       | 0,001696945 | -1,3422278 | zinc finger protein 583                                          |
| GPR85        | 0,002304744 | -1,3421533 | G protein-coupled receptor 85                                    |
| TOMM40       | 0,037903094 | -1,3410932 | translocase of outer mitochondrial membrane 40 homolog (yeast)   |
| PPP1R12B     | 0,002220758 | -1,3398506 | protein phosphatase 1, regulatory subunit 12B                    |
| CETN3        | 0,028881835 | -1,3385272 | centrin, EF-hand protein, 3                                      |
| SPG7         | 0,004733672 | -1,3364935 | spastic paraplegia 7 (pure and complicated autosomal recessive)  |
| ZNF529       | 0,000253678 | -1,3355919 | zinc finger protein 529                                          |
| DHODH        | 0,001392747 | -1,3350546 | dihydroorotate dehydrogenase (quinone)                           |

|              |             |            |                                                                                             |
|--------------|-------------|------------|---------------------------------------------------------------------------------------------|
| SCN5A        | 0,020801651 | -1,3346584 | sodium channel, voltage-gated, type V, alpha subunit                                        |
| ANO8         | 0,000505613 | -1,3342568 | anoctamin 8                                                                                 |
| PICK1        | 0,007532039 | -1,3341758 | protein interacting with PRKCA 1                                                            |
| MAP4K2       | 0,004338812 | -1,333747  | mitogen-activated protein kinase kinase kinase kinase 2                                     |
| LOC100505501 | 0,046389098 | -1,3331681 | uncharacterized LOC100505501                                                                |
| GLCC1        | 0,00359157  | -1,3330513 | glucocorticoid induced transcript 1                                                         |
| TIGD7        | 0,000586222 | -1,3330274 | tigger transposable element derived 7                                                       |
| WWP1         | 0,012321611 | -1,3321218 | WW domain containing E3 ubiquitin protein ligase 1                                          |
| PRTN3        | 0,026518809 | -1,3316916 | proteinase 3                                                                                |
| BTN2A3P      | 0,041430329 | -1,3316115 | butyrophilin, subfamily 2, member A3, pseudogene                                            |
| LEPROTL1     | 0,00052555  | -1,3314097 | leptin receptor overlapping transcript-like 1                                               |
| PAFAH2       | 0,001088906 | -1,3300401 | platelet-activating factor acetylhydrolase 2, 40kDa                                         |
| IGF2R        | 0,016478017 | -1,3296409 | insulin-like growth factor 2 receptor                                                       |
| ZNF597       | 0,000411582 | -1,3295353 | zinc finger protein 597                                                                     |
| POP5         | 0,002283477 | -1,3273461 | processing of precursor 5, ribonuclease P/MRP subunit ( <i>S. cerevisiae</i> )              |
| CTGLF12P     | 0,004819567 | -1,327185  | centaurin, gamma-like family, member 12 pseudogene                                          |
| WDHD1        | 0,010795352 | -1,3270463 | WD repeat and HMG-box DNA binding protein 1                                                 |
| SCGB1D2      | 0,021003823 | -1,3267899 | secretoglobin, family 1D, member 2                                                          |
| SLC24A1      | 0,001967434 | -1,3257515 | solute carrier family 24 (sodium/potassium/calcium exchanger), member 1                     |
| FCF1         | 0,000893052 | -1,3253516 | FCF1 rRNA-processing protein                                                                |
| FUZ          | 0,001702425 | -1,3252056 | fuzzy planar cell polarity protein                                                          |
| SLC22A18     | 0,007251161 | -1,324906  | solute carrier family 22, member 18                                                         |
| ATP5G2       | 0,000709645 | -1,3248081 | ATP synthase, H <sup>+</sup> transporting, mitochondrial Fo complex, subunit C2 (subunit 9) |
| RORA         | 0,006631345 | -1,3234951 | RAR-related orphan receptor A                                                               |
| EMC3         | 0,008169809 | -1,3229588 | ER membrane protein complex subunit 3                                                       |
| SLC48A1      | 0,039669834 | -1,3222461 | solute carrier family 48 (heme transporter), member 1                                       |
| FAM114A2     | 0,00708291  | -1,3216804 | family with sequence similarity 114, member A2                                              |
| SH3BP1       | 0,011792514 | -1,321656  | SH3-domain binding protein 1                                                                |
| TSHZ1        | 0,014596959 | -1,3211625 | teashirt zinc finger homeobox 1                                                             |

|              |             |            |                                                              |
|--------------|-------------|------------|--------------------------------------------------------------|
| C12orf66     | 0,000203941 | -1,3210868 | chromosome 12 open reading frame 66                          |
| ELMOD3       | 0,020024314 | -1,3208707 | ELMO/CED-12 domain containing 3                              |
| ZFAND4       | 0,012688677 | -1,3197611 | zinc finger, AN1-type domain 4                               |
| ZNF552       | 0,016306817 | -1,3193199 | zinc finger protein 552                                      |
| AAMDC        | 0,001439407 | -1,3189167 | adipogenesis associated, Mth938 domain containing            |
| CCDC80       | 0,012785421 | -1,3176459 | coiled-coil domain containing 80                             |
| 01-mars      | 0,002144075 | -1,3170426 | mitochondrial amidoxime reducing component 1                 |
| COPZ2        | 0,00446735  | -1,3168432 | coatamer protein complex, subunit zeta 2                     |
| FGFR1OP2     | 0,044780384 | -1,3166358 | FGFR1 oncogene partner 2                                     |
| FAM188A      | 0,003648237 | -1,3165661 | family with sequence similarity 188, member A                |
| LOC100129831 | 0,011641242 | -1,3164446 | EPWW6493                                                     |
| NAT2         | 0,002680263 | -1,316322  | N-acetyltransferase 2 (arylamine N-acetyltransferase)        |
| GTF2E1       | 0,001884065 | -1,3161585 | general transcription factor IIE, polypeptide 1, alpha 56kDa |
| DSTYK        | 0,007108797 | -1,3157935 | dual serine/threonine and tyrosine protein kinase            |
| SIPA1L2      | 0,047313325 | -1,3148525 | signal-induced proliferation-associated 1 like 2             |
| LOC284926    | 0,024090944 | -1,3145791 | uncharacterized LOC284926                                    |
| KMT2C        | 0,009645868 | -1,3144941 | lysine (K)-specific methyltransferase 2C                     |
| BOD1         | 0,002680423 | -1,3138467 | biorientation of chromosomes in cell division 1              |
| KLK7         | 0,022303523 | -1,3136588 | kallikrein-related peptidase 7                               |
| AASS         | 0,006582401 | -1,3135639 | aminoadipate-semialdehyde synthase                           |
| C6orf89      | 0,000611295 | -1,3133824 | chromosome 6 open reading frame 89                           |
| SNORA24      | 0,035296152 | -1,3131291 | small nucleolar RNA, H/ACA box 24                            |
| ZNF181       | 0,001880708 | -1,3129778 | zinc finger protein 181                                      |
| FAM114A1     | 0,018195681 | -1,312034  | family with sequence similarity 114, member A1               |
| NRARP        | 0,020693483 | -1,311789  | NOTCH-regulated ankyrin repeat protein                       |
| MSTN         | 0,022254945 | -1,3117369 | myostatin                                                    |
| PBLD         | 0,002076173 | -1,3116632 | phenazine biosynthesis-like protein domain containing        |
| LINC01220    | 0,00316008  | -1,3104798 | long intergenic non-protein coding RNA 1220                  |
| WASH3P       | 0,045402003 | -1,3096695 | WAS protein family homolog 3 pseudogene                      |

|              |             |            |                                                                                   |
|--------------|-------------|------------|-----------------------------------------------------------------------------------|
| LINC00888    | 0,032781303 | -1,3096368 | long intergenic non-protein coding RNA 888                                        |
| UGP2         | 0,000421148 | -1,3094742 | UDP-glucose pyrophosphorylase 2                                                   |
| HIBCH        | 0,018276002 | -1,3092099 | 3-hydroxyisobutyryl-CoA hydrolase                                                 |
| ZRANB2-AS1   | 0,001225605 | -1,3089163 | ZRANB2 antisense RNA 1                                                            |
| LOC100507642 | 0,0089658   | -1,3085335 | uncharacterized LOC100507642                                                      |
| NARS2        | 0,008072514 | -1,308363  | asparaginyl-tRNA synthetase 2, mitochondrial (putative)                           |
| COQ7         | 0,001663171 | -1,3082361 | coenzyme Q7 homolog, ubiquinone (yeast)                                           |
| ABCC4        | 0,006899952 | -1,3080828 | ATP-binding cassette, sub-family C (CFTR/MRP), member 4                           |
| UNC50        | 0,00045447  | -1,3077205 | unc-50 homolog (C. elegans)                                                       |
| LIN54        | 0,000115584 | -1,307675  | lin-54 DREAM MuvB core complex component                                          |
| ECRP         | 0,049460309 | -1,3075926 | ribonuclease, RNase A family, 2 (liver, eosinophil-derived neurotoxin) pseudogene |
| SMIM8        | 0,009451373 | -1,3075159 | small integral membrane protein 8                                                 |
| FRMD6        | 0,006988321 | -1,3071283 | FERM domain containing 6                                                          |
| SNAI1        | 0,005358947 | -1,3070879 | snail family zinc finger 1                                                        |
| SLC25A37     | 0,012638396 | -1,3068283 | solute carrier family 25 (mitochondrial iron transporter), member 37              |
| STK16        | 0,004456323 | -1,3063921 | serine/threonine kinase 16                                                        |
| APAF1        | 0,016727863 | -1,3056144 | apoptotic peptidase activating factor 1                                           |
| FBN2         | 0,001555372 | -1,3052843 | fibrillin 2                                                                       |
| PTPDC1       | 0,001937868 | -1,3043393 | protein tyrosine phosphatase domain containing 1                                  |
| SNTB1        | 0,011261414 | -1,3039621 | syntrophin, beta 1 (dystrophin-associated protein A1, 59kDa, basic component 1)   |
| HERC2P10     | 0,002247642 | -1,3038698 | hect domain and RLD 2 pseudogene 10                                               |
| NME7         | 0,010830808 | -1,303706  | NME/NM23 family member 7                                                          |
| UBE2H        | 0,003404064 | -1,3035155 | ubiquitin-conjugating enzyme E2H                                                  |
| EFR3B        | 0,009063648 | -1,3033233 | EFR3 homolog B (S. cerevisiae)                                                    |
| FAM111A      | 0,005440964 | -1,3029492 | family with sequence similarity 111, member A                                     |
| RNU6ATAC     | 0,028072235 | -1,3028096 | RNA, U6atac small nuclear (U12-dependent splicing)                                |
| UGGT2        | 0,045455808 | -1,3026241 | UDP-glucose glycoprotein glucosyltransferase 2                                    |
| ARHGEF17     | 0,020246587 | -1,3025311 | Rho guanine nucleotide exchange factor (GEF) 17                                   |
| GOLGA8I      | 0,002905279 | -1,3022005 | golgin A8 family, member I                                                        |

|       |             |            |                                                             |
|-------|-------------|------------|-------------------------------------------------------------|
| OTUD1 | 0,026590855 | -1,3021712 | OTU deubiquitinase 1                                        |
| NUDT1 | 0,001214281 | -1,301479  | nudix (nucleoside diphosphate linked moiety X)-type motif 1 |
| PROX2 | 0,004981875 | -1,3014476 | prospero homeobox 2                                         |
| MED20 | 0,000759746 | -1,301134  | mediator complex subunit 20                                 |
| C1RL  | 0,026241998 | -1,3001489 | complement component 1, r subcomponent-like                 |



**Supplemental Table 7: HIV modulated genes in CD16+ MDDCs**

| <b>Symbol</b> | <b>p-value</b> | <b>FC</b>  | <b>description</b>                                                               |
|---------------|----------------|------------|----------------------------------------------------------------------------------|
| IFI6          | 0,010221956    | 1,968091   | interferon, alpha-inducible protein 6                                            |
| OR56A3        | 0,002357016    | 1,66518148 | olfactory receptor, family 56, subfamily A, member 3                             |
| MIR568        | 0,040890114    | 1,56560746 | microRNA 568                                                                     |
| MIR4718       | 0,024762177    | 1,54548873 | microRNA 4718                                                                    |
| SNORA5A       | 0,003895082    | 1,53541148 | small nucleolar RNA, H/ACA box 5A                                                |
| SNORA30       | 0,007230177    | 1,52762718 | small nucleolar RNA, H/ACA box 30                                                |
| KRTAP6-3      | 0,00694776     | 1,45609    | keratin associated protein 6-3                                                   |
| FANCM         | 0,000270071    | 1,45062457 | Fanconi anemia, complementation group M                                          |
| CD101         | 0,008782713    | 1,44986461 | CD101 molecule                                                                   |
| MIR4717       | 0,001891888    | 1,44467935 | microRNA 4717                                                                    |
| ZNF714        | 0,007858588    | 1,43397999 | zinc finger protein 714                                                          |
| LINC00864     | 0,019410526    | 1,41647605 | long intergenic non-protein coding RNA 864                                       |
| ZNF429        | 0,045714769    | 1,41191091 | zinc finger protein 429                                                          |
| LOC101927780  | 0,003900453    | 1,3959715  | uncharacterized LOC101927780                                                     |
| LOC645513     | 0,025011597    | 1,39384275 | uncharacterized LOC645513                                                        |
| KBTBD7        | 0,007735633    | 1,38795765 | kelch repeat and BTB (POZ) domain containing 7                                   |
| SKP1          | 0,027506979    | 1,38561761 | S-phase kinase-associated protein 1                                              |
| SIGLEC1       | 0,008329708    | 1,38177798 | sialic acid binding Ig-like lectin 1, sialoadhesin                               |
| MIR3692       | 0,021478142    | 1,38015051 | microRNA 3692                                                                    |
| OR1F1         | 0,0097904      | 1,37583921 | olfactory receptor, family 1, subfamily F, member 1                              |
| ZNHIT6        | 0,002811787    | 1,37084049 | zinc finger, HIT-type containing 6                                               |
| CCDC122       | 0,033813873    | 1,36929275 | coiled-coil domain containing 122                                                |
| MIR3188       | 0,008186345    | 1,36920461 | microRNA 3188                                                                    |
| MIR4441       | 0,036939034    | 1,35856016 | microRNA 4441                                                                    |
| TAF1          | 0,003414014    | 1,35846164 | TAF1 RNA polymerase II, TATA box binding protein (TBP)-associated factor, 250kDa |
| YTHDC1        | 0,018870484    | 1,35066555 | YTH domain containing 1                                                          |
| OSTCP1        | 0,013699726    | 1,34066132 | oligosaccharyltransferase complex subunit pseudogene 1                           |

|              |             |            |                                                                                 |
|--------------|-------------|------------|---------------------------------------------------------------------------------|
| SCARNA1      | 0,039900606 | 1,34036652 | small Cajal body-specific RNA 1                                                 |
| KLF10        | 0,037547325 | 1,32951119 | Kruppel-like factor 10                                                          |
| MIR4672      | 0,029647765 | 1,32760385 | microRNA 4672                                                                   |
| MIR548S      | 0,018225471 | 1,32654998 | microRNA 548s                                                                   |
| RFC4         | 0,002375303 | 1,32432101 | replication factor C (activator 1) 4, 37kDa                                     |
| RBM5-AS1     | 0,005270973 | 1,3221625  | RBM5 antisense RNA 1                                                            |
| ZNF461       | 0,022592554 | 1,31688106 | zinc finger protein 461                                                         |
| EIF2AK2      | 0,03560488  | 1,316649   | eukaryotic translation initiation factor 2-alpha kinase 2                       |
| DSTNP2       | 0,004970196 | 1,31626219 | destrin (actin depolymerizing factor) pseudogene 2                              |
| SLC9A9-AS1   | 0,000229358 | 1,31484914 | SLC9A9 antisense RNA 1                                                          |
| KRTAP19-3    | 0,014239561 | 1,31475759 | keratin associated protein 19-3                                                 |
| CASP6        | 0,013581768 | 1,31155655 | caspase 6, apoptosis-related cysteine peptidase                                 |
| ZNF671       | 0,026552925 | 1,31064429 | zinc finger protein 671                                                         |
| DDIAS        | 0,013119191 | 1,30711789 | DNA damage-induced apoptosis suppressor                                         |
| MIR583       | 0,004009033 | 1,30573938 | microRNA 583                                                                    |
| ZNF502       | 0,007326323 | 1,30490537 | zinc finger protein 502                                                         |
| MIR4491      | 0,047645655 | 1,30048258 | microRNA 4491                                                                   |
| CACHD1       | 0,022633845 | -1,3003855 | cache domain containing 1                                                       |
| LINC01227    | 0,011920412 | -1,3017127 | long intergenic non-protein coding RNA 1227                                     |
| LOC101927048 | 0,031657254 | -1,302562  | uncharacterized LOC101927048                                                    |
| IGHG1        | 0,023429579 | -1,3025629 | immunoglobulin heavy constant gamma 1 (G1m marker)                              |
| MIR668       | 0,006754652 | -1,3038167 | microRNA 668                                                                    |
| CPB2         | 0,006969596 | -1,304655  | carboxypeptidase B2 (plasma)                                                    |
| OR4Q3        | 0,038772054 | -1,3046751 | olfactory receptor, family 4, subfamily Q, member 3                             |
| PTGIR        | 0,045493925 | -1,3053578 | prostaglandin I2 (prostacyclin) receptor (IP)                                   |
| YME1L1       | 0,006586036 | -1,3080892 | YME1-like 1 ATPase                                                              |
| FUT3         | 0,000930999 | -1,309466  | fucosyltransferase 3 (galactoside 3(4)-L-fucosyltransferase, Lewis blood group) |
| MIR4535      | 0,009038383 | -1,3128914 | microRNA 4535                                                                   |
| LOC100507600 | 0,042026527 | -1,3149904 | uncharacterized LOC100507600                                                    |

|              |             |            |                                                           |
|--------------|-------------|------------|-----------------------------------------------------------|
| SCUBE2       | 0,00467118  | -1,3186049 | signal peptide, CUB domain, EGF-like 2                    |
| MIR4660      | 0,022351703 | -1,3188539 | microRNA 4660                                             |
| GPR157       | 0,02667323  | -1,319101  | G protein-coupled receptor 157                            |
| KRT33A       | 0,011441411 | -1,3200227 | keratin 33A                                               |
| CEACAM3      | 0,039753348 | -1,3201396 | carcinoembryonic antigen-related cell adhesion molecule 3 |
| OR4C15       | 0,012683765 | -1,320524  | olfactory receptor, family 4, subfamily C, member 15      |
| ADH4         | 9,07E-06    | -1,3256659 | alcohol dehydrogenase 4 (class II), pi polypeptide        |
| PRDM8        | 0,032879378 | -1,3264211 | PR domain containing 8                                    |
| DPPA2P3      | 0,027837763 | -1,3276574 | developmental pluripotency associated 2 pseudogene 3      |
| ACTR3BP2     | 0,012585715 | -1,3289025 | ACTR3B pseudogene 2                                       |
| FNDC9        | 5,53E-05    | -1,3315931 | fibronectin type III domain containing 9                  |
| IGKC         | 0,004790646 | -1,3326149 | immunoglobulin kappa constant                             |
| OR4C46       | 0,002924049 | -1,3339919 | olfactory receptor, family 4, subfamily C, member 46      |
| ROR1         | 0,013954291 | -1,3372708 | receptor tyrosine kinase-like orphan receptor 1           |
| GTF2IRD2B    | 0,019655188 | -1,3418047 | GTF2I repeat domain containing 2B                         |
| CNR1         | 0,000118855 | -1,3454607 | cannabinoid receptor 1 (brain)                            |
| LCE2D        | 0,000220042 | -1,3482892 | late cornified envelope 2D                                |
| PSG5         | 0,019579212 | -1,3495535 | pregnancy specific beta-1-glycoprotein 5                  |
| MIR3138      | 0,004340243 | -1,3513563 | microRNA 3138                                             |
| MIR4450      | 0,001278039 | -1,3535304 | microRNA 4450                                             |
| COX6A2       | 0,001239072 | -1,3550833 | cytochrome c oxidase subunit VIa polypeptide 2            |
| OR8G2        | 0,035758808 | -1,3575106 | olfactory receptor, family 8, subfamily G, member 2       |
| LINC01005    | 0,003473389 | -1,3579652 | long intergenic non-protein coding RNA 1005               |
| CCR4         | 0,033393456 | -1,3595554 | chemokine (C-C motif) receptor 4                          |
| IFNA16       | 0,003641616 | -1,3612035 | interferon, alpha 16                                      |
| OR1D2        | 0,034194074 | -1,3623369 | olfactory receptor, family 1, subfamily D, member 2       |
| LOC101927123 | 0,035194429 | -1,3632814 | uncharacterized LOC101927123                              |
| XKRX         | 0,004620171 | -1,36333   | XK, Kell blood group complex subunit-related, X-linked    |
| ATF3         | 0,040012329 | -1,3641792 | activating transcription factor 3                         |

|            |             |            |                                                                    |
|------------|-------------|------------|--------------------------------------------------------------------|
| STX17-AS1  | 0,002002675 | -1,3642297 | STX17 antisense RNA 1                                              |
| LOC641746  | 0,005818948 | -1,3681907 | glycine cleavage system protein H (aminomethyl carrier) pseudogene |
| OR2T27     | 0,018329986 | -1,3693531 | olfactory receptor, family 2, subfamily T, member 27               |
| MED27      | 0,038605833 | -1,3719773 | mediator complex subunit 27                                        |
| MYO1G      | 0,027554106 | -1,3745789 | myosin IG                                                          |
| DPCR1      | 0,005393344 | -1,3751977 | diffuse panbronchiolitis critical region 1                         |
| CCDC30     | 0,005556183 | -1,3834838 | coiled-coil domain containing 30                                   |
| SNORD114-2 | 0,005264758 | -1,385326  | small nucleolar RNA, C/D box 114-2                                 |
| MRGPRF     | 0,00155234  | -1,385951  | MAS-related GPR, member F                                          |
| OR7E91P    | 0,046244484 | -1,3869837 | olfactory receptor, family 7, subfamily E, member 91 pseudogene    |
| ARHGDI3    | 0,01742141  | -1,3878794 | Rho GDP dissociation inhibitor (GDI) gamma                         |
| LGALS17A   | 0,007934522 | -1,3967619 | Charcot-Leyden crystal protein pseudogene                          |
| OR1E2      | 0,010562849 | -1,4033784 | olfactory receptor, family 1, subfamily E, member 2                |
| PIM1       | 0,016264855 | -1,4034802 | Pim-1 proto-oncogene, serine/threonine kinase                      |
| TM4SF1     | 0,015272953 | -1,4125108 | transmembrane 4 L six family member 1                              |
| SYNPO2     | 0,045636933 | -1,4232858 | synaptopodin 2                                                     |
| TNC        | 0,044861797 | -1,4357688 | tenascin C                                                         |
| GPRC5D     | 0,003437914 | -1,4386597 | G protein-coupled receptor, class C, group 5, member D             |
| GADD45B    | 0,006868853 | -1,4394911 | growth arrest and DNA-damage-inducible, beta                       |
| ANXA3      | 0,047021491 | -1,4436867 | annexin A3                                                         |
| KRTAP5-2   | 0,006475139 | -1,4493416 | keratin associated protein 5-2                                     |
| LRRC32     | 0,004734083 | -1,469846  | leucine rich repeat containing 32                                  |
| CYP7B1     | 0,014564978 | -1,4711518 | cytochrome P450, family 7, subfamily B, polypeptide 1              |
| VAT1L      | 0,044666471 | -1,4713233 | vesicle amine transport 1-like                                     |
| SSX6       | 0,002804592 | -1,4730097 | synovial sarcoma, X breakpoint 6 (pseudogene)                      |
| RNU6-71P   | 0,011547322 | -1,4780684 | RNA, U6 small nuclear 71, pseudogene                               |
| OR5L2      | 0,03045223  | -1,4870442 | olfactory receptor, family 5, subfamily L, member 2                |
| JADE3      | 0,006203094 | -1,4982212 | jade family PHD finger 3                                           |
| OR10K2     | 0,008998587 | -1,5110778 | olfactory receptor, family 10, subfamily K, member 2               |

|          |             |            |                                                                                      |
|----------|-------------|------------|--------------------------------------------------------------------------------------|
| ASB9     | 0,000103973 | -1,5211856 | ankyrin repeat and SOCS box containing 9                                             |
| OR2J3    | 0,004540337 | -1,5242646 | olfactory receptor, family 2, subfamily J, member 3                                  |
| OR6C75   | 0,010914591 | -1,5303631 | olfactory receptor, family 6, subfamily C, member 75                                 |
| USP17L15 | 0,04663262  | -1,536454  | ubiquitin specific peptidase 17-like family member 15                                |
| IL2RA    | 0,049518186 | -1,5714987 | interleukin 2 receptor, alpha                                                        |
| FLT3     | 0,041744562 | -1,6068745 | fms-related tyrosine kinase 3                                                        |
| TMEM176A | 0,019301509 | -1,6180501 | transmembrane protein 176A                                                           |
| MFI2     | 0,013617843 | -1,6447771 | antigen p97 (melanoma associated) identified by monoclonal antibodies 133.2 and 96.5 |
| IFNA1    | 9,19E-05    | -1,6458915 | interferon, alpha 1                                                                  |
| MIR509-3 | 0,006282835 | -1,7023894 | microRNA 509-3                                                                       |
| MIR548I3 | 0,002205234 | -1,7798673 | microRNA 548i-3                                                                      |
| CRLF2    | 0,037775954 | -1,8259217 | cytokine receptor-like factor 2                                                      |
| USP17L5  | 0,002405697 | -1,8370337 | ubiquitin specific peptidase 17-like family member 5                                 |
| ROCK1P1  | 0,03887543  | -1,8946092 | Rho-associated, coiled-coil containing protein kinase 1 pseudogene 1                 |

**Supplemental Table 8: HIV modulated genes in CD16- MDDCs**

| Symbol       | p-value    | FC         | description                                                         |
|--------------|------------|------------|---------------------------------------------------------------------|
| MIR1271      | 0,00320353 | 1,68465532 | microRNA 1271                                                       |
| MIR516A2     | 0,0066327  | 1,55339607 | microRNA 516a-2                                                     |
| MIR3911      | 0,01464117 | 1,43881251 | microRNA 3911                                                       |
| PKP2         | 0,00132011 | 1,42950038 | plakophilin 2                                                       |
| PNRC2        | 0,01478631 | 1,40814485 | proline-rich nuclear receptor coactivator 2                         |
| LINC01482    | 0,00158313 | 1,39425015 | long intergenic non-protein coding RNA 1482                         |
| MIR196A1     | 0,00107515 | 1,38737478 | microRNA 196a-1                                                     |
| S100B        | 0,00379993 | 1,38731961 | S100 calcium binding protein B                                      |
| OR14J1       | 0,02526722 | 1,38335967 | olfactory receptor, family 14, subfamily J, member 1                |
| DAPL1        | 0,01117891 | 1,37696886 | death associated protein-like 1                                     |
| LINC00424    | 0,00353778 | 1,36513011 | long intergenic non-protein coding RNA 424                          |
| MIR320C1     | 0,03420108 | 1,35681946 | microRNA 320c-1                                                     |
| CFHR4        | 0,0225081  | 1,35064297 | complement factor H-related 4                                       |
| LINC00971    | 0,00194834 | 1,34401165 | long intergenic non-protein coding RNA 971                          |
| MIR3665      | 0,03484974 | 1,33711721 | microRNA 3665                                                       |
| MRGPRX1      | 0,00567116 | 1,33233456 | MAS-related GPR, member X1                                          |
| SLC15A1      | 0,00046748 | 1,33209542 | solute carrier family 15 (oligopeptide transporter), member 1       |
| LOC100132781 | 0,03086186 | 1,3245989  | cyclin Y-like 1 pseudogene                                          |
| MIR3201      | 0,03550733 | 1,32251538 | microRNA 3201                                                       |
| NOV          | 0,03681012 | 1,31873791 | nephroblastoma overexpressed                                        |
| MYH8         | 0,02901191 | 1,31650693 | myosin, heavy chain 8, skeletal muscle, perinatal                   |
| MIR523       | 0,00261917 | 1,31519087 | microRNA 523                                                        |
| LINC00841    | 0,00286886 | 1,3108561  | long intergenic non-protein coding RNA 841                          |
| TOMM20L      | 0,0003556  | 1,3093606  | translocase of outer mitochondrial membrane 20 homolog (yeast)-like |
| PRR29        | 0,00310369 | 1,30516836 | proline rich 29                                                     |
| HAVCR1P1     | 0,04764594 | -1,3022709 | hepatitis A virus cellular receptor 1 pseudogene 1                  |
| BUB1         | 0,03401889 | -1,305262  | BUB1 mitotic checkpoint serine/threonine kinase                     |

|           |            |            |                                                                   |
|-----------|------------|------------|-------------------------------------------------------------------|
| POLR3G    | 0,00724593 | -1,3077108 | polymerase (RNA) III (DNA directed) polypeptide G (32kD)          |
| GSTA3     | 0,01108908 | -1,3169463 | glutathione S-transferase alpha 3                                 |
| OR52B4    | 0,01880424 | -1,3226039 | olfactory receptor, family 52, subfamily B, member 4              |
| MIR4308   | 0,00721187 | -1,3301939 | microRNA 4308                                                     |
| CCNE2     | 0,00687041 | -1,3430922 | cyclin E2                                                         |
| ADAMTS7   | 0,00170555 | -1,3459929 | ADAM metallopeptidase with thrombospondin type 1 motif, 7         |
| LINC01146 | 0,00077437 | -1,3516697 | long intergenic non-protein coding RNA 1146                       |
| TNKS      | 0,04313061 | -1,3523867 | tankyrase, TRF1-interacting ankyrin-related ADP-ribose polymerase |
| MIR130B   | 0,0498077  | -1,3524797 | microRNA 130b                                                     |
| SNORD12C  | 0,02671416 | -1,357668  | small nucleolar RNA, C/D box 12C                                  |
| TAPT1-AS1 | 0,01481401 | -1,3628192 | TAPT1 antisense RNA 1 (head to head)                              |
| GPR139    | 2,12E-05   | -1,3763213 | G protein-coupled receptor 139                                    |
| OR2M1P    | 0,01444679 | -1,3834148 | olfactory receptor, family 2, subfamily M, member 1 pseudogene    |
| CD99P1    | 0,03658546 | -1,391496  | CD99 molecule pseudogene 1                                        |
| ANTXR1    | 0,02106583 | -1,3973597 | anthrax toxin receptor 1                                          |
| MIR545    | 0,04325518 | -1,3975958 | microRNA 545                                                      |
| SNORD75   | 0,03014721 | -1,4204792 | small nucleolar RNA, C/D box 75                                   |
| HIST2H3D  | 0,00490891 | -1,4336476 | histone cluster 2, H3d                                            |
| TUBB4A    | 2,59E-05   | -1,434088  | tubulin, beta 4A class IVa                                        |
| SNORA70B  | 0,02683601 | -1,4438313 | small nucleolar RNA, H/ACA box 70B                                |
| DDIT3     | 0,00026278 | -1,4683294 | DNA-damage-inducible transcript 3                                 |
| HIST1H2BL | 0,00704575 | -1,4787993 | histone cluster 1, H2bl                                           |
| MIR4263   | 0,0234331  | -1,4971114 | microRNA 4263                                                     |
| TACC1     | 0,04009342 | -1,562148  | transforming, acidic coiled-coil containing protein 1             |
| MIR3975   | 0,01988061 | -1,5686144 | microRNA 3975                                                     |
| MIR4499   | 0,00078196 | -1,5810924 | microRNA 4499                                                     |
| SNORD99   | 0,01060176 | -1,6034008 | small nucleolar RNA, C/D box 99                                   |
| HIST1H2AJ | 0,00672921 | -1,8646805 | histone cluster 1, H2aj                                           |
